# Supplementary material for: Effect of Peg-IFN on the viral kinetics of patients with HDV infection treated with bulevirtide
Source: PubMed Central journal article supplement — JHEP Rep. 2024 Mar 24;6(8):101070. doi: 10.1016/j.jhepr.2024.101070 (PMC11295569; doi:10.1016/j.jhepr.2024.101070), 2024-03-24
Supplement: mmc1.pdf [file mmc1.pdf]

# Effect of Peg-IFN on the viral kinetics of HDV infected patients treated with bulevirtide

## Supplementary materials

Selma El Messaoudi, Ségolène Brichler, Claire Fougerou-Leurent, Emmanuel Gordien, Athenais Gerber, Amal Kortebi, Garance Lagadic, Miroslava Subic-Levrero, Sophie Metivier, Stanislas Pol, Anne Minello, Vlad Ratziu, Vincent Leroy, Philippe Mathurin, Laurent Alric, Fatoumata Coulibaly, Jean-Michel Pawlotsky, Fabien Zoulim, Victor de Lédighen, Jérémie Guedj and the ANRS HD EP01 BULEDELTA study group

|                                                                       |    |
|-----------------------------------------------------------------------|----|
| Table of contents                                                     |    |
| List of investigators.....                                            | 2  |
| Additional text.....                                                  | 3  |
| 1. Calibration curves.....                                            | 3  |
| 2. Model prediction : results of the intention-to-treat scenario..... | 4  |
| 2. Model code.....                                                    | 4  |
| Figures.....                                                          | 8  |
| 1. Observations and treatment assigned.....                           | 8  |
| 2. Doses of Peg-IFN.....                                              | 10 |
| 3. Treatment response.....                                            | 11 |
| 4. Calibration curves.....                                            | 15 |
| 5. Survival analysis : Probability of stopping treatment.....         | 17 |
| 6. Model evaluation.....                                              | 19 |
| Tables.....                                                           | 22 |
| 1. Limit of quantification.....                                       | 22 |
| 2. Estimation of treatment effect.....                                | 23 |
| 3. Sensitivity analysis taking into account the dose of Peg-IFN.....  | 24 |
| 4. Model prediction : comparison to MY204 study.....                  | 25 |

## 31 List of investigators

32  
33 Sophie Metivier<sup>1</sup>, Victor de Ledinghen<sup>2</sup>, Stanislas Pol<sup>3</sup>, Anne Minello<sup>4</sup>, Vlad Ratziu<sup>5</sup>, Vincent Leroy<sup>6</sup>,  
34 Philippe Mathurin<sup>7</sup>, Laurent Alric<sup>8</sup>, Nathalie Ganne<sup>9</sup>, Fabien Zoulim<sup>10</sup>, Véronique Loustaud-Ratti<sup>11</sup>,  
35 Dominique Roulot<sup>9</sup>, Karine Lacombe<sup>12</sup>, Caroline Lascoux-Combe<sup>12</sup>, Georges-Philippe Pageaux<sup>13</sup>,  
36 Isabelle Rosa<sup>14</sup>, Caroline Jezequel<sup>15</sup>, Jérôme Dumortier<sup>16</sup>, Ghassan Riachi<sup>17</sup>, Olivier  
37 Chazaouilleres<sup>12</sup>, Dulce Alfaiate<sup>18</sup>, Dider Samuel<sup>19</sup>, Xavier Causse<sup>20</sup>, Armando Abergel<sup>21</sup>, Julie  
38 Chas<sup>22</sup>, Anne Gervais<sup>23</sup>, Marc Bourlière<sup>24</sup>, Louis d'Alteroche<sup>25</sup>

- 39  
40  
41 1. Department of Hepatology, CHU Rangueil, Toulouse, France  
42 2. Centre d'Investigation de la Fibrose Hépatique, Bordeaux University Hospital, Pessac,  
43 France; INSERM U1312, Bordeaux University, Bordeaux, France.  
  
44 3. Department of Hepatology, Hôpital Cochin, AP-HP, Université Paris-René Descartes,  
45 INSERM U1016, Paris, France.  
46 4. Department of Hepatology and Gastroenterology, University hospital Dijon, INSERM UMR  
47 1231, France.  
48 5. Sorbonne Université, Assistance Publique-Hôpitaux de Paris, Hôpital Pitié Salpêtrière-,  
49 Institute of Cardiometabolism and Nutrition (ICAN), Paris, France.  
50 6. Department of Hepatology and Gastroenterology, Centre Hospitalo-Universitaire, INSERM  
51 U1209, Université Grenoble Alpes, Grenoble, France.  
52 7. Service des maladies de l'appareil digestif, Université Lille 2 and Inserm U795, France.  
53 8. Department of Internal Medicine and Digestive Diseases, UMR-152, Toulouse III University,  
54 France.  
55 9. Department of Hepatology, Hôpital Avicenne AP-HP, Bobigny, France  
56 10. Department of Hepatology, Hospices Civils de Lyon, France.  
57 11. Department of Hepatology ; Dupuytren Hospital, Limoges, France  
58 12. Department of Infectious and Tropical Diseases, Saint-Antoine Hospital- APHP, Paris,  
59 France  
60 13. Department of Hepatology, Saint Eloi Hospital, Montpellier, France .  
61 14. Department of Hepatology, CHIC, Créteil, France.  
62 15. Department of Hepatology, Pontchaillou Hospital, Rennes, France.  
63 16. Department of Hepatology, Edouard Herriot Hospital, Lyon, France.  
64 17. Department of Hepatology, Charles Nicolle Hospital, Rouen, France  
65 18. Department of Infectious and Tropical Diseases, Hospices Civils de Lyon, France.  
66 19. Department of Hepatology, Paul Brousse Hospital- APHP, Villejuif, France

- 67 20. Department of Hepatology, La Source Hospital, Orléans, France  
68 21. Department of Hepatology, Estaing Hospital, Clermont-Ferrand, France  
69 22. Department of Infectious and Tropical Diseases, Tenon Hospital- APHP, Paris, France  
70 23. Department of Infectious and Tropical Diseases, Bichat Hospital- APHP, Paris, France  
71 24. Department of Hepatology, Saint Joseph Hospital- APHP, Paris, France  
72 25. Department of Hepatology, Trousseau Hospital- APHP, Paris, France

73  
74  
75  
76

77 Additional text

78

### 79 *1. Calibration curves*

80

81 We identified heterogeneity in the units informed in the data, with some observations informed in  
82 cp/mL, and others in IU/mL. We developed calibration curves to homogenize the concentrations.

### 83 *Methods*

84 The French National Reference Center for HDV organizes each year a program for external quality  
85 assessment of HDV RNA quantification. Therefore, the same samples are measured using both  
86 home-made techniques (in cp/mL), and the reference technique (in IU/mL). (**Figure S9**). Those data  
87 were used to derive linear regression curves.

88

89 For each center, linear regression (relationship between the concentration measured with the  
90 reference technique and in each center (home-made technique) to predict the concentration in  
91 IU/mL.

$$92 C_{Avicenne} = aC_{centre}^i + b$$

93 with  $C_{Avicenne}$  the concentration measured in Avicenne,  $C_{centre}^i$  : concentration measured in center  $i$ ,  
94  $a$  the slope,  $b$  the intercept

95 The linear regression curves are represented in **Figure S10**.

96

### 97 *2. Survival analysis*

98 The probability of treatment discontinuation (**Figure S11**) was estimated for each treatment  
99 independently with an exponential model as follow :

100

$$S(t) = \exp(-\lambda t)$$

101 The event was defined as a definitive cessation of treatment.

102

## 103 *2. Model prediction : results of the intention-to-treat scenario*

104

105 In the intention-to-treat scenario, where the risk of treatment discontinuation of both BLV and Peg-  
106 IFN is accounted for, these rates were slightly lower. After 48 weeks, we predicted a virological  
107 response of 48.2% (PI 95% = [41.2 ; 56.2]) and 78.3% (PI 95% = [66.7 ; 88.4]) in patients treated  
108 with BLV and BLV+Peg-IFN, respectively (**Figure 4B**).

109 After 144 weeks of treatment, these values were equal to 60.5% (95% PI = [54.4 ; 70.2]) and 85.5%  
110 (95% PI = [76.8 ; 92.8]), respectively, and 79.7% (95% PI = [71.0 ; 88.4]) for the  
111 intermediate treatment strategy.

112 The rates of combined response after 48 weeks were predicted to be 19.3% (PI 95% = [14.0 ; 27.42])  
113 and 30.4% (PI 95% = [20.3 ; 42.0]), with BLV monotherapy and BLV+Peg-IFN, respectively and  
114 increased to 24.6% (PI 95% = [17.5 ; 33.3]), 34.8% (PI 95% = [24.6 ; 44.9]) and 31.9% (PI 95% =  
115 [21.7 ; 43.5]) with BLV monotherapy, BLV+Peg-IFN, and the intermediate treatment strategy,  
116 respectively.

117 Regarding the rates of undetectability, after 48 weeks we predicted rates of 30.7% (PI 95% = [22.8  
118 ; 37.7]) and 55.8% (PI 95% = [43.5 ; 69.6]) with BLV monotherapy or BLV + Peg-IFN, respectively  
119 and after 144 weeks of treatment, those rates increased to 50% (PI 95% = [41.3 ; 58.7]), 73.9% (PI  
120 95% = [63.8 ; 85.5]) and 62.3% (PI 95% = [52.2 ; 76.8]) with BLV monotherapy, BLV+Peg-IFN and  
121 the intermediate treatment strategy, respectively.

122 The rate of viral cure would drop to 7.0% (95% PI = 2.6 ; 12.3]) and 15.9% (95% PI = [7.2 ; 24.6]) in  
123 patients treated with BLV and BLV+Peg-IFN, respectively, after 48 weeks. After 96 weeks, these  
124 rates were equal to 19.7% (95% PI = 14.0 ; 36.3]), 36.2% (95% PI = [24.6 ; 47.9]) and 23.2 (95% PI  
125 = [14.5 ; 34.8]) , for the monotherapy, the combination therapy and the intermediate treatment  
126 strategy, respectively.

127 The rate of viral cure would drop to 7.0% (95% PI = 2.6 ; 12.3]) and 15.9% (95% PI = [7.2 ; 24.6]) in  
128 patients treated with BLV and BLV+Peg-IFN, respectively, after 48 weeks. After 96 weeks, these  
129 rates were equal to 19.7% (95% PI = 14.0 ; 36.3]), 36.2% (95% PI = [24.6 ; 47.9]) and 23.2 (95% PI  
130 = [14.5 ; 34.8]) , for the monotherapy, the combination therapy and the intermediate treatment  
131 strategy, respectively.

132

133

## 134 *2. Model code*

135 DESCRIPTION: Neumann-Lam model (Neumann et al., Science, 282, 1998)

136

137 [LONGITUDINAL]

```

138 input = {beta_log, delta, p, c, eps_beta_BLV, eps_p_PEG, An, A0, ca, V0_log, tlag, lambda_BLV,
139 lambda_PEG, Start_PEG, End_PEG_1, Restart_PEG_1, End_PEG_2, Restart_PEG_2,
140 End_PEG_3, First_stop_BLV, Restart_BLV_1, End_BLV_2, Restart_BLV_2}
141 Start_PEG={use=regressor}
142 End_PEG_1={use=regressor}
143 Restart_PEG_1={use=regressor}
144 End_PEG_2={use=regressor}
145 Restart_PEG_2={use=regressor}
146 End_PEG_3={use=regressor}
147 First_stop_BLV={use=regressor}
148 Restart_BLV_1={use=regressor}
149 End_BLV_2={use=regressor}
150 Restart_BLV_2={use=regressor}
151
152 EQUATION:
153 ; Initial conditions
154 t0 = 0
155 beta=10^beta_log
156 V0= 10^V0_log
157 T0= (c*delta)/(beta*p)
158 IC_0 = (beta*V0*T0)/delta
159 VL_0 = V0
160
161
162 ; Before IFN both eta and epsilon equal 0. Once therapy is initiated, both are >0
163 ; inhibition before and after the end of treatment
164
165 ; Dates PEG
166
167 if t <0
168 BLV =0
169 end
170
171 if t >= First_stop_BLV & t < Restart_BLV_1
172 BLV =0
173 end
174

```

```
175  if t >= End_BLV_2 & t < Restart_BLV_2
176  BLV =0
177  end
178  if t >=0 & t < First_stop_BLV
179  BLV=1
180  end
181
182  if t >=Restart_BLV_1 & t < End_BLV_2
183  BLV=1
184  end
185
186  if t >=Restart_BLV_2
187  BLV=1
188  end
189
190  ; Dates PEG
191  if t < Start_PEG + tlag
192  PEG =0
193  end
194
195  if t >= End_PEG_1 & t < Restart_PEG_1
196  PEG =0
197  end
198
199  if t >= End_PEG_2 & t < Restart_BLV_2
200  PEG =0
201  end
202
203  if t >= End_PEG_3
204  PEG =0
205  end
206
207  if t >=Start_PEG + tlag & t < End_PEG_1
208  PEG =1
209  end
210
211  if t >=Restart_PEG_1 + tlag & t < End_PEG_2
```

```

212 PEG=1
213 end
214
215 if t >=Restart_PEG_2 + tlag & t < End_PEG_3
216 PEG=1
217 end
218
219 if BLV==0 & PEG==0
220 eps_beta = 0
221 eps_p = 0
222
223 elseif BLV==1 & PEG==0
224 eps_beta = eps_beta_BLV
225 eps_p = 0
226 elseif BLV==0 & PEG==1
227 eps_beta = 0
228 eps_p= eps_p_PEG
229 else
230 eps_beta =eps_beta_BLV
231 eps_p= eps_p_PEG
232 end
233
234 ALT = An*(1 - (A0-An)/(An*(ca-delta))*(delta*exp(-ca*t)-exp(-delta*t)))
235
236 ; Viral dynamic model
237 ddt_IC = beta*(1-eps_beta)*T0*VL - delta*IC
238 ddt_VL = p*(1-eps_p)*IC - c*VL
239
240 LVL = log10(max(VL,-3)) ; to have LVL positive
241
242 ; Survival model
243 haz_BLV = lambda_BLV
244 haz_PEG = lambda_PEG
245
246 DEFINITION:
247 Event_BLV= {type=event, maxEventNumber=1, hazard=haz_BLV}
248 Event_PEG= {type=event, maxEventNumber=1, hazard=haz_PEG}

```

249

250 OUTPUT:

251 output = {LVL, ALT, Event\_BLV, Event\_PEG}

252

253 Figures

254 1. Observations and treatment assigned

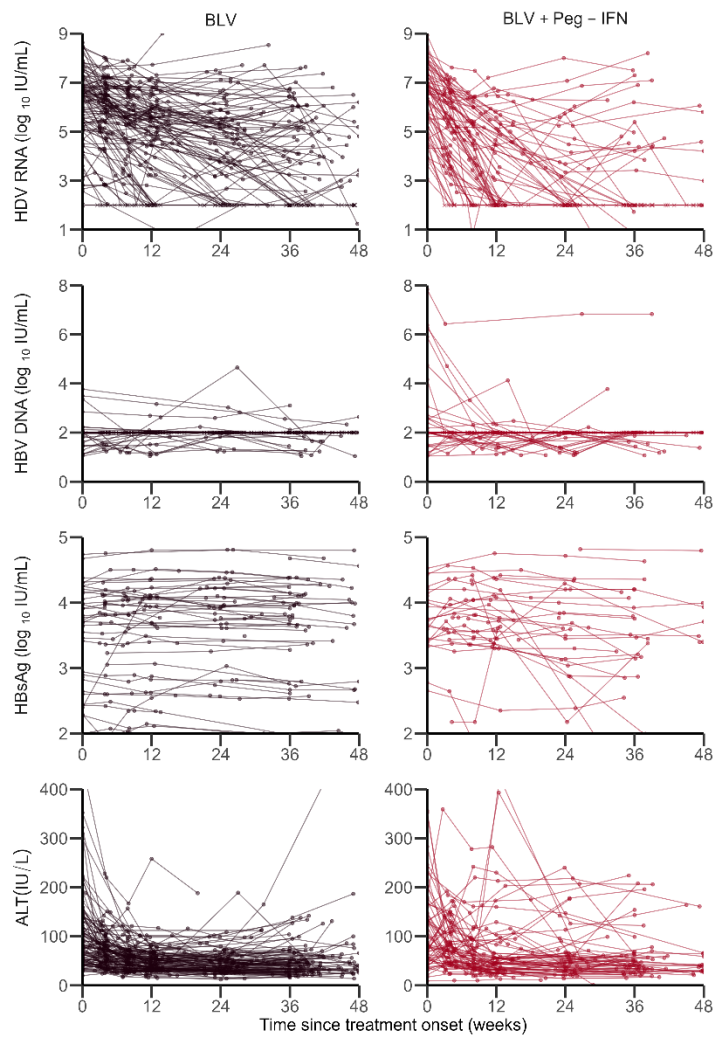

**Figure S1:** Dynamics of HDV RNA, HBV DNA, HBsAg and ALT during treatment in the group treated with bulevirtide alone (BLV) or in combination with Peg-IFN (BLV+Peg-IFN).



270

271

272

273

274

275

276

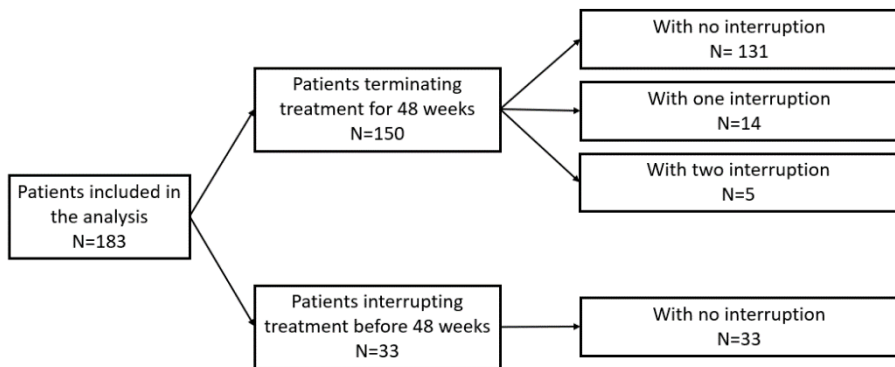

277 **Figure S2:** Workflow of the number of patients interrupting treatment during the analysis.

278

279

280

281

282

283

284

285

286

287

288

289

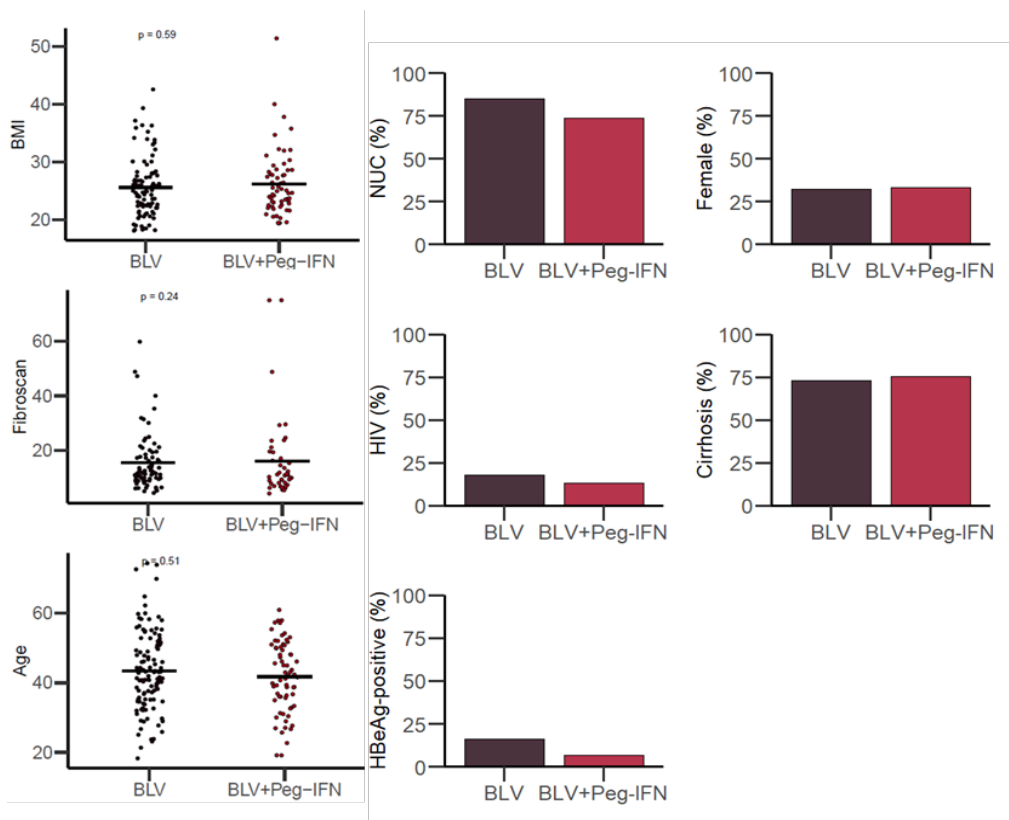

290 **Figure S3:** Patients characteristics versus treatment received at baseline. Black represents the group treated  
291 with monotherapy and red represents the group treated with the combination.

292

293

294 2. Doses of Peg-IFN

295 The dose of Peg-IFN was available in 46 patients. Among them, the dose was adjusted  
296 throughout the analysis in 10 patients (8 for whom the dose was reduced, and 2 for whom  
297 the dose was increased.) For 3 patients, the dose was reduced twice.

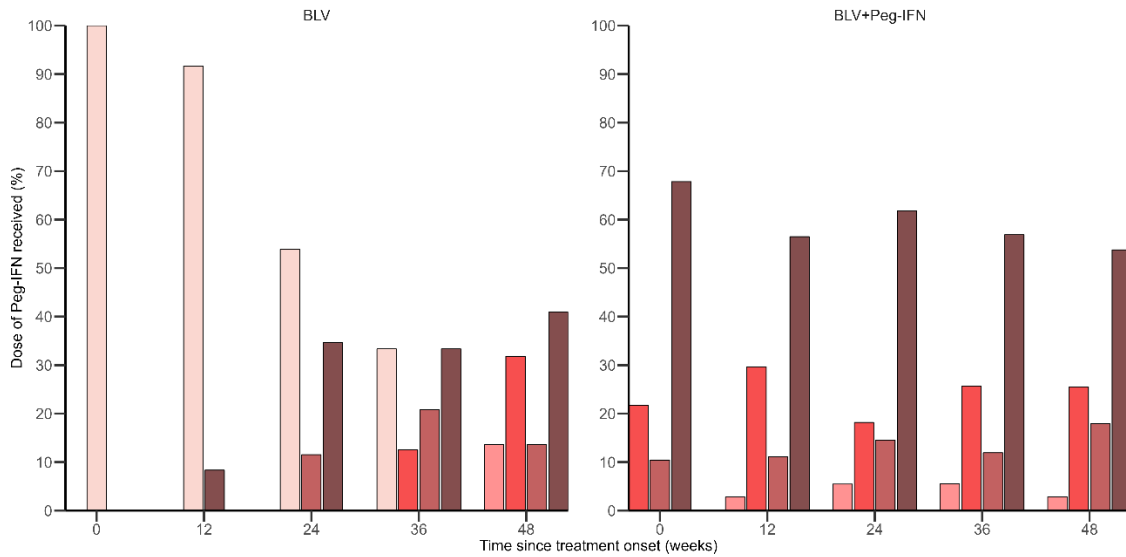

298 **Figure S4:** Percentage of doses of Peg-IFN available during the analysis. Each level of the gradient of reds  
299 correspond to a dose (0, 45, 90, 180), the higher the dose, the darker the red.  
300

301  
302  
303  
304  
305  
306  
307  
308  
309  
310  
311

312 3. Treatment response

313

314

315

316

317

318

319

320

321

322

323

324

325

326

327

328

329

330

331

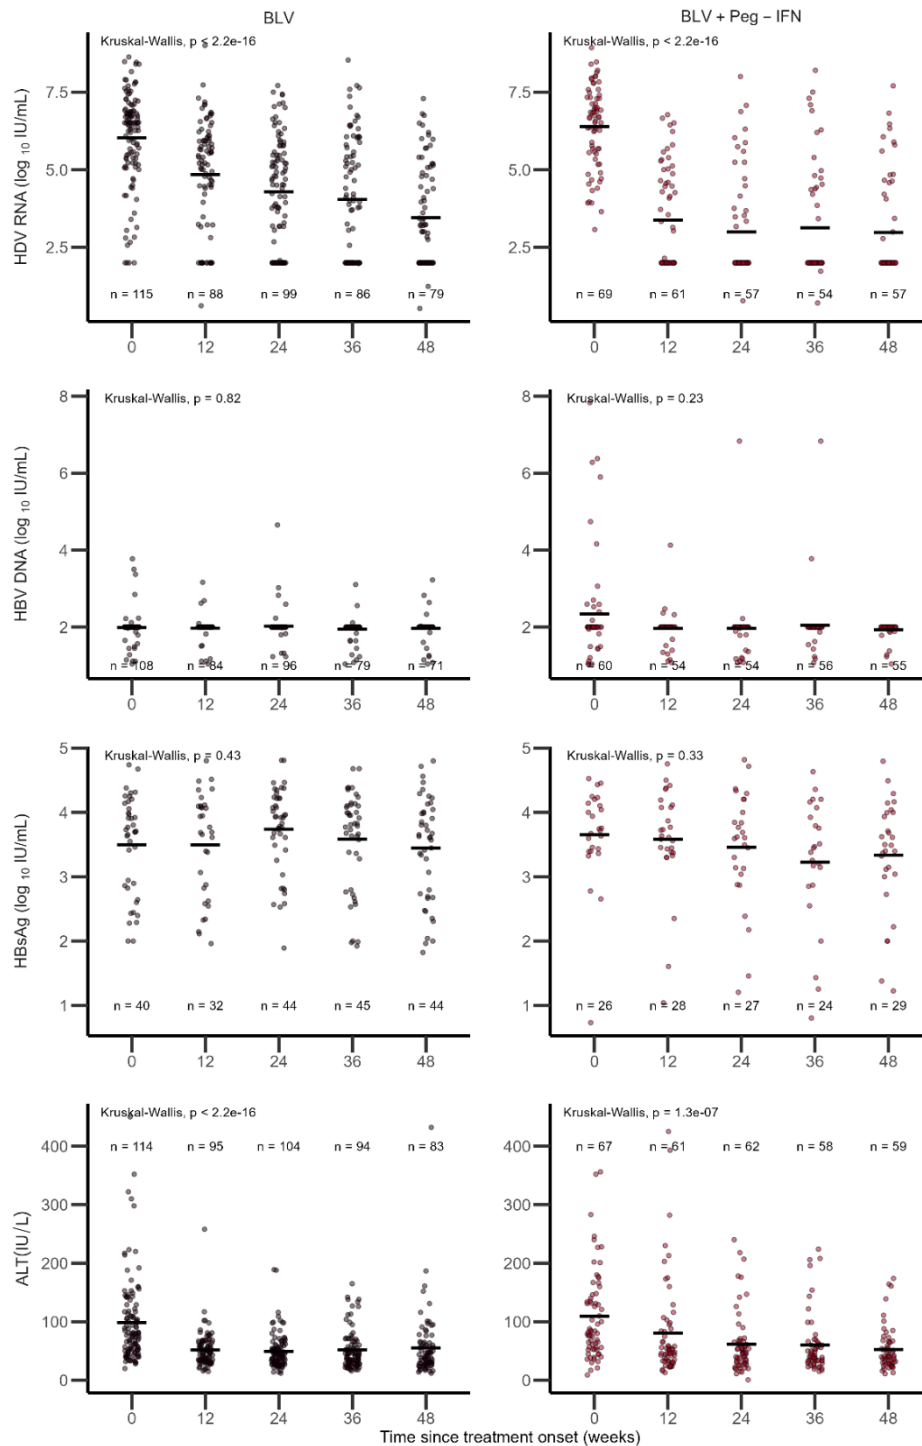

332 **Figure S5:** Virologic and biochemical decline kinetics in each group. The plain line represents the  
333 median, n represent the number of observations

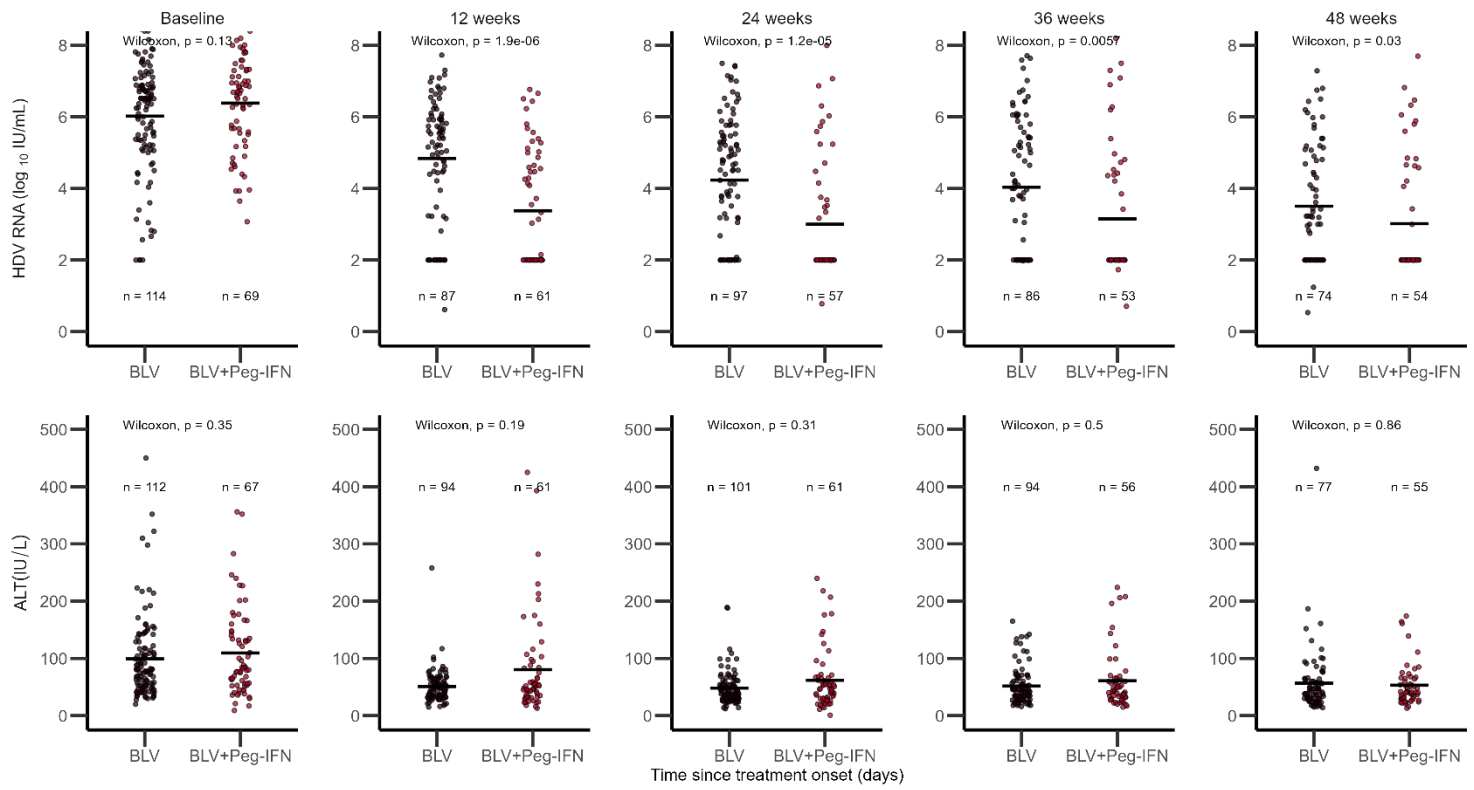

334 **Figure S6:** Distribution of the observed HDV RNA and ALT levels across the study in groups Buleviride (BLV)  
 335 and bulevirite+Peg-IFN (BLV+Peg-IFN). The plain line represents the median concentration, n represent the  
 336 number of observations.  
 337

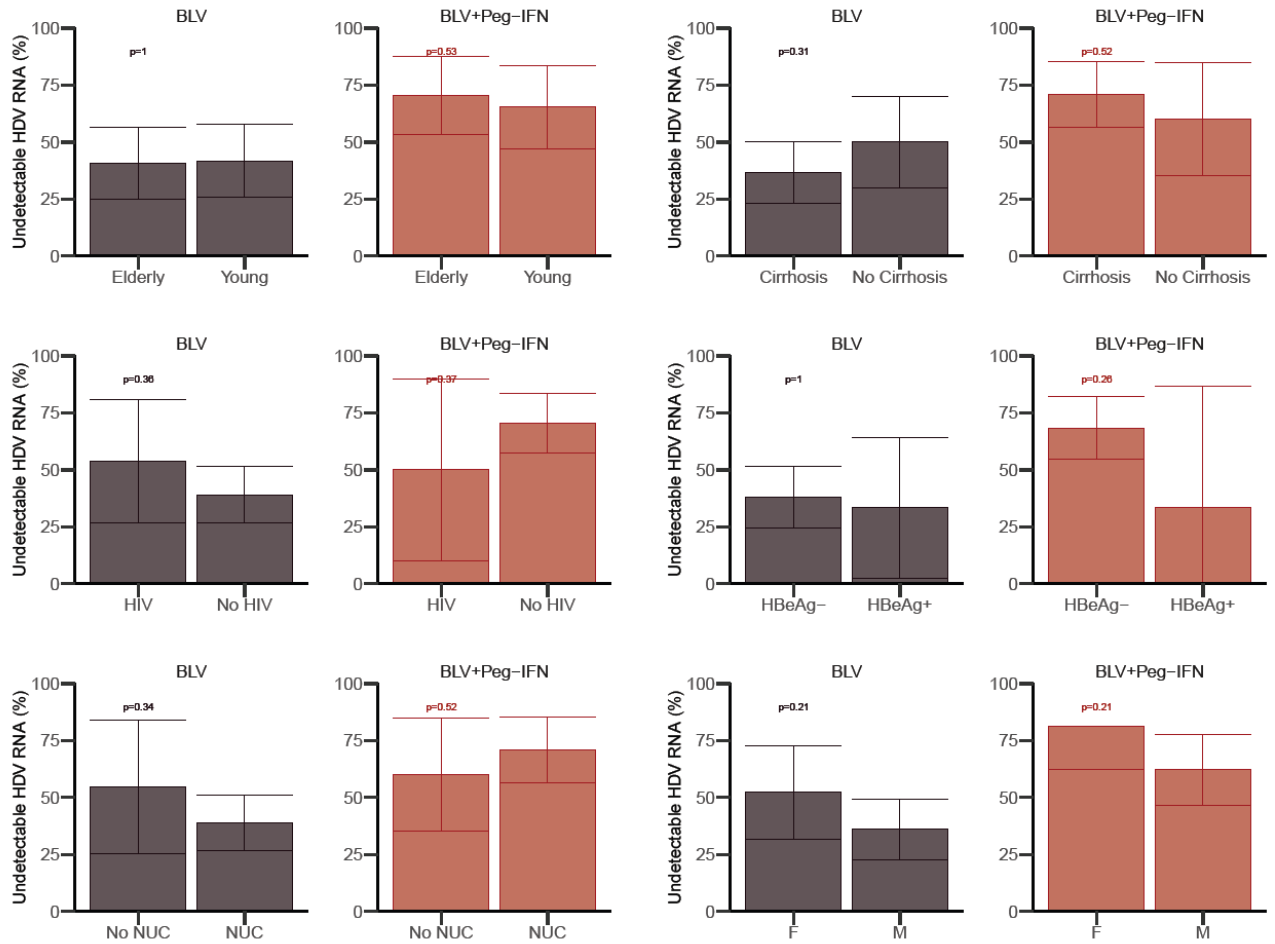

338  
 339  
 340 **Figure S7** : Percentage of undetectable HDV RNA in each group according to baseline covariates. The  
 341 errorbars correspond to the 95% confidence interval of a binomial law.

342  
 343  
 344  
 345  
 346  
 347  
 348  
 349  
 350

351  
352  
353  
354  
355  
356  
357  
358  
359  
360  
361  
362  
363  
364  
365  
366  
367  
368  
369  
370  
371  
372  
373  
374  
375  
376  
377  
378

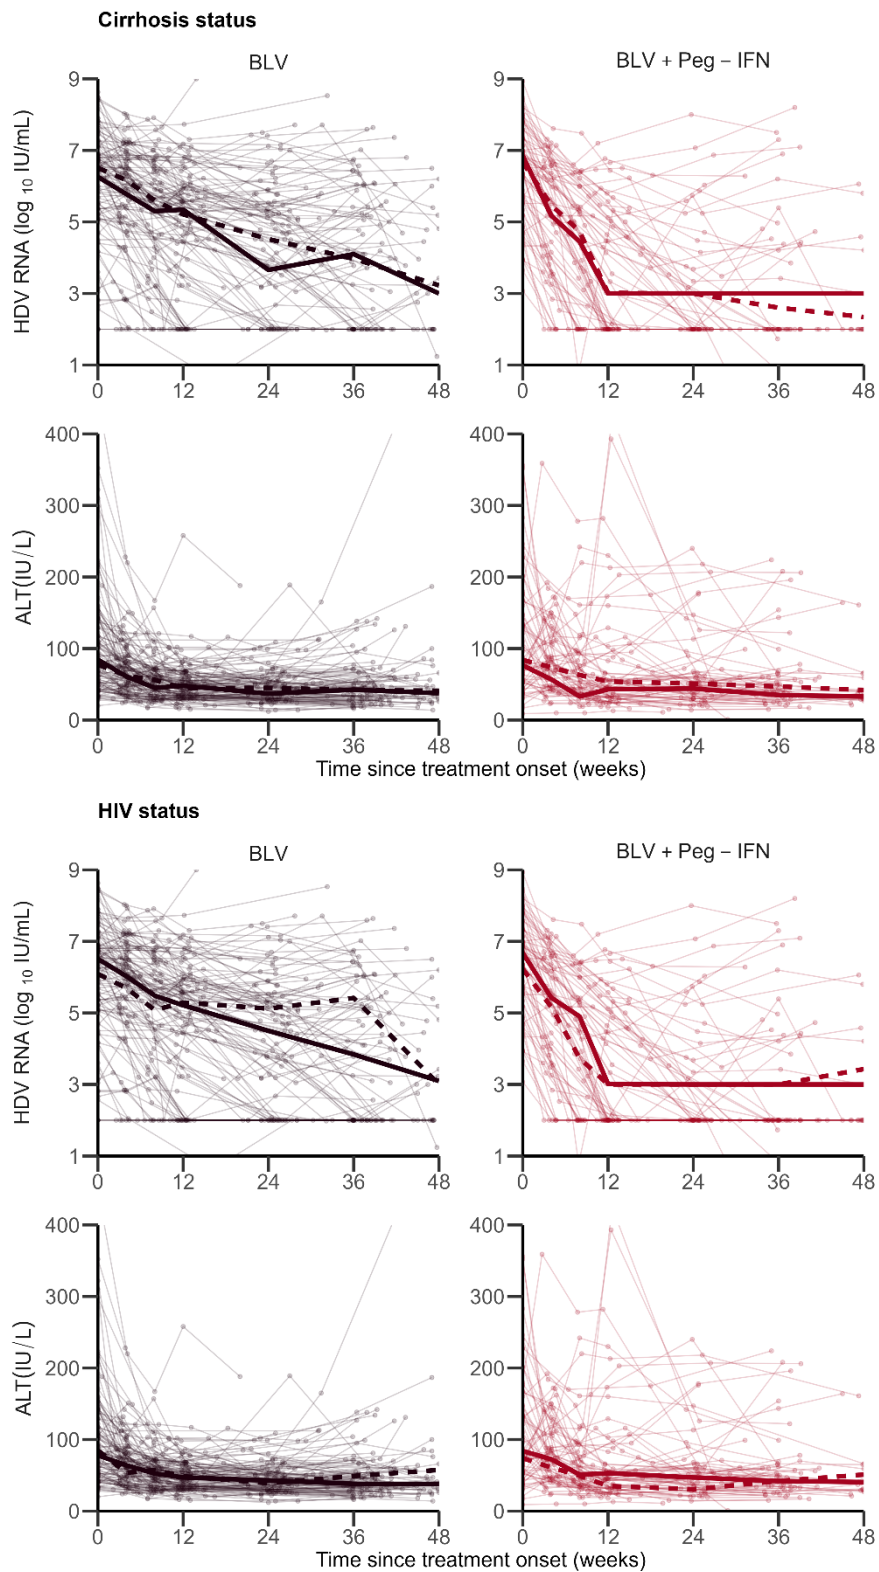

**Figure S8** : HDV RNA and ALT kinetics observed in each group. The large line correspond to the median observed in top : cirrhotic patients (plain line) versus non-cirrhotic patients (dashed line) ; bottom : HIV patients (plain line) versus non-HIV patients (dashed line).

379 4. Calibration curves

380  
381

382  
383  
384  
385  
386

387  
388  
389  
390  
391

392  
393  
394  
395  
396

397  
398

399

400  
401  
402  
403

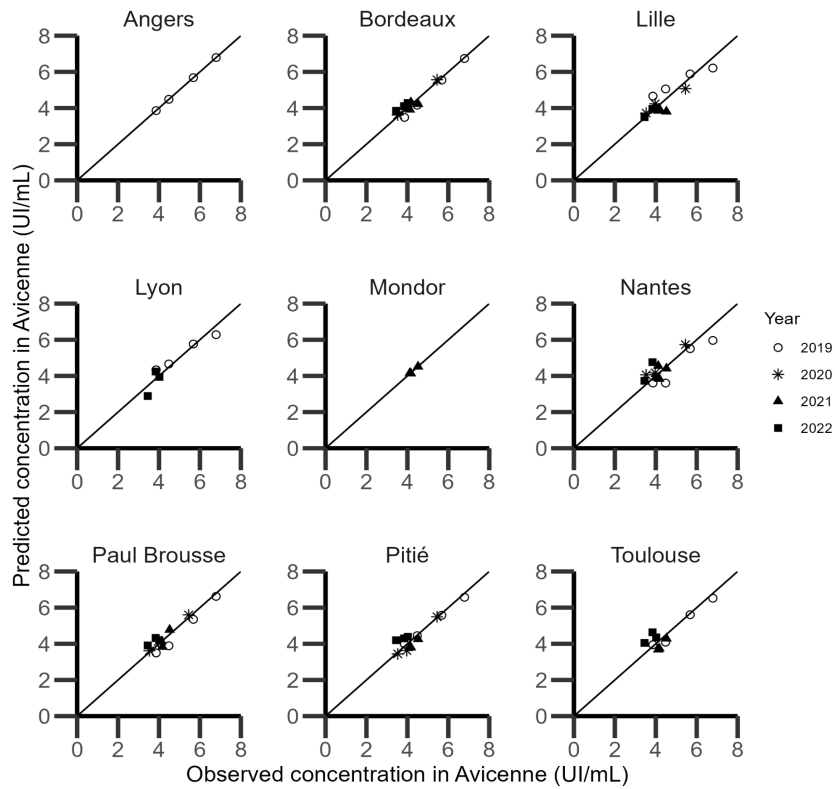

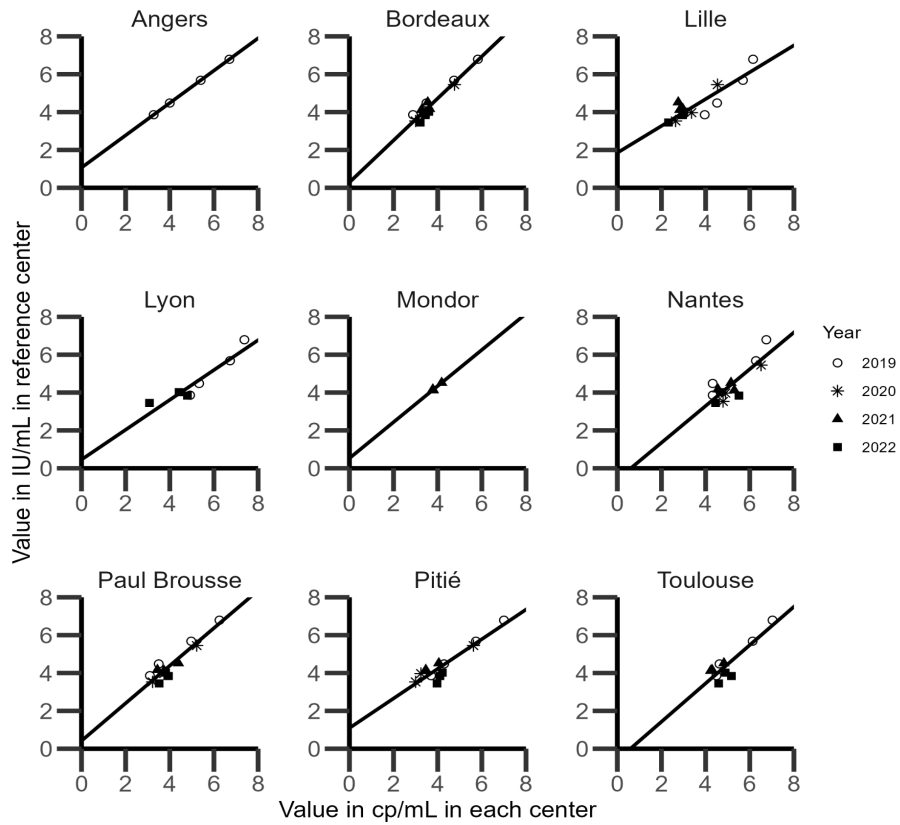

423 **Figure S10:** Linear regression curves allowing to derive concentrations from the reference technique.

424

425

426

427

428

429



430 5. Survival analysis : Probability of stopping treatment

431

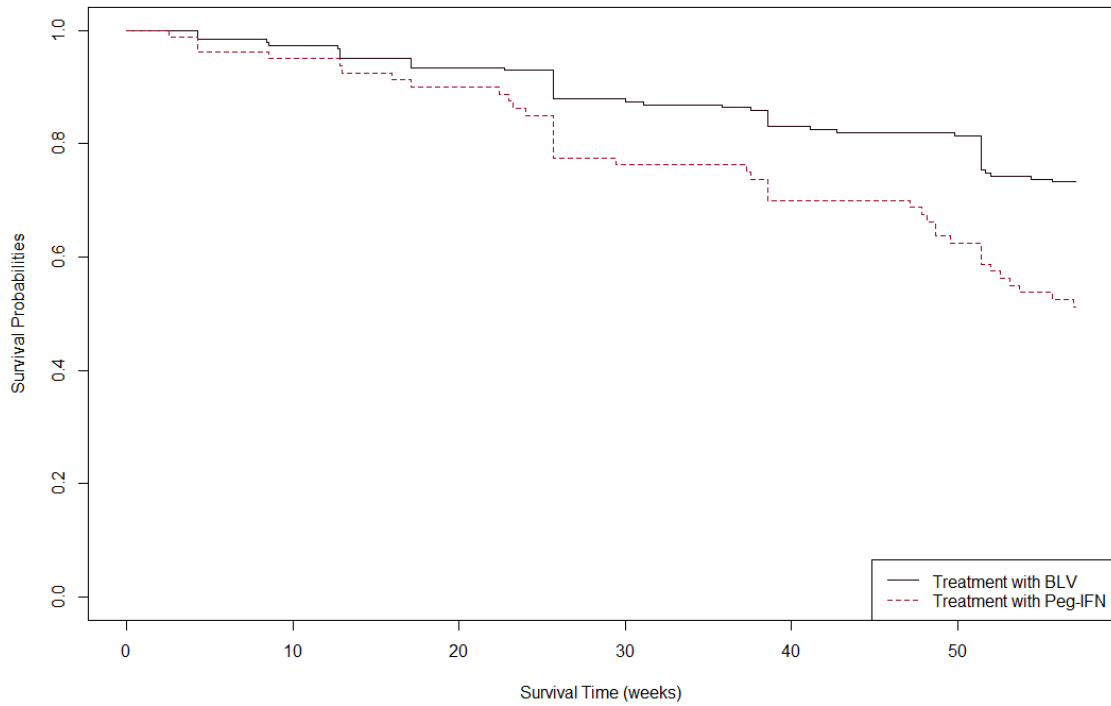

432 **Figure S11:** Kaplan-Meier curves on the survival probability of treatment cessation.

433

434

435

436

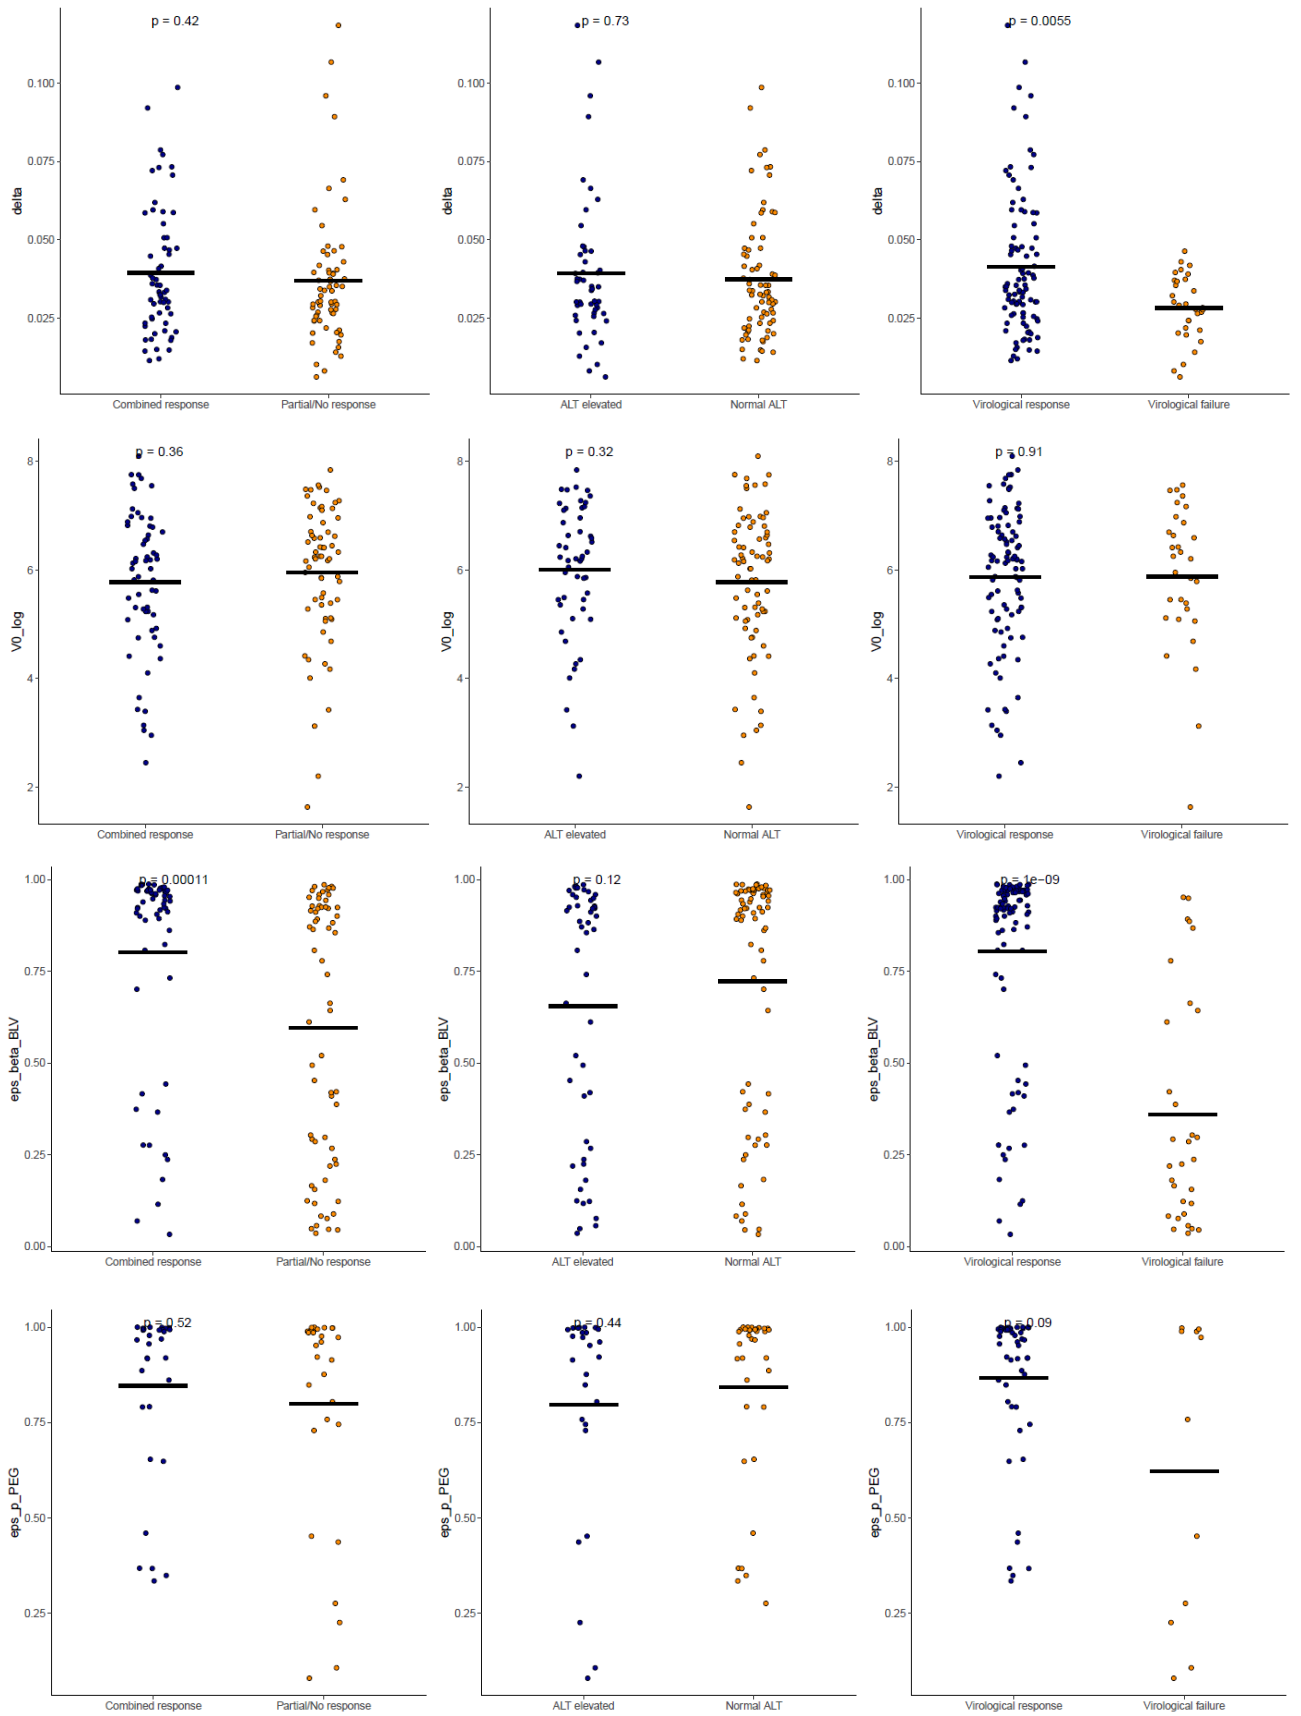

437  
 438 **Figure S12** : Distribution of parameters according to the virological, biochemical or combined response of  
 439 the patients.

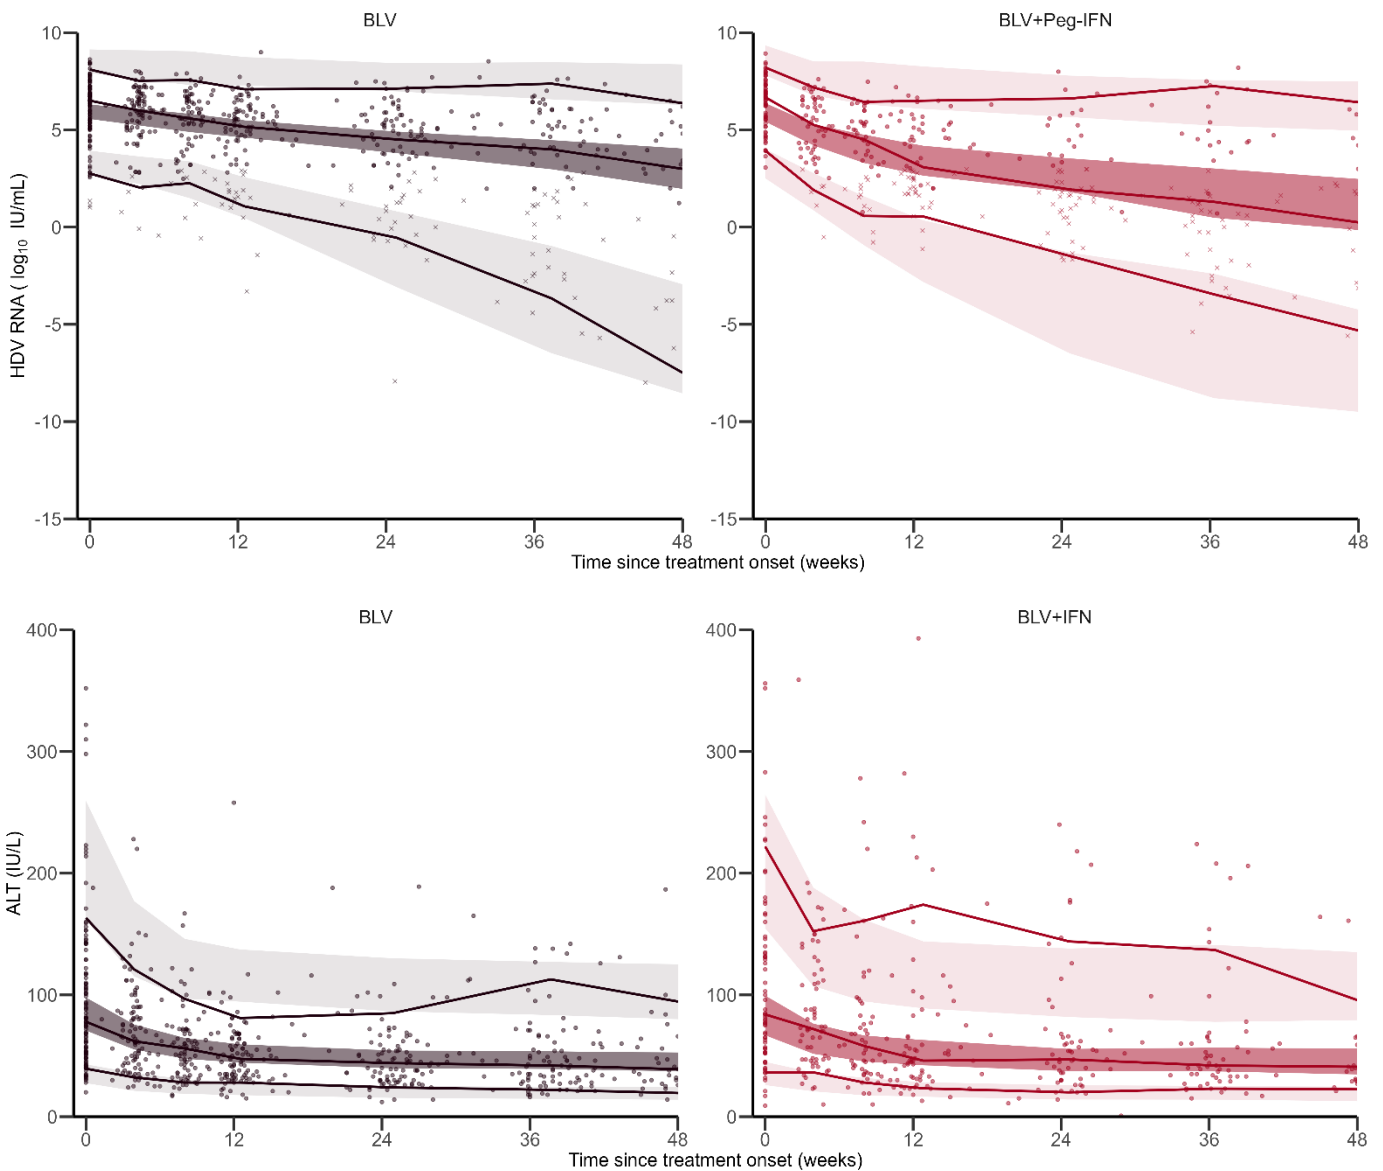

441 The model was evaluated using visual predictive checks (VPCs) and individual fits (Figure S2).

442 **Figure S13:** Visual predictive checks (VPCs) stratified on arms Bulevirtide monotherapy (BLV) or  
 443 in combination with Peg-IFN. Dots represent observed values, plain lines represent the 5th, 50th  
 444 and 95th empirical percentiles on observed data. Shaded areas represent the 95% prediction  
 445 interval around the corresponding percentiles.

446

447

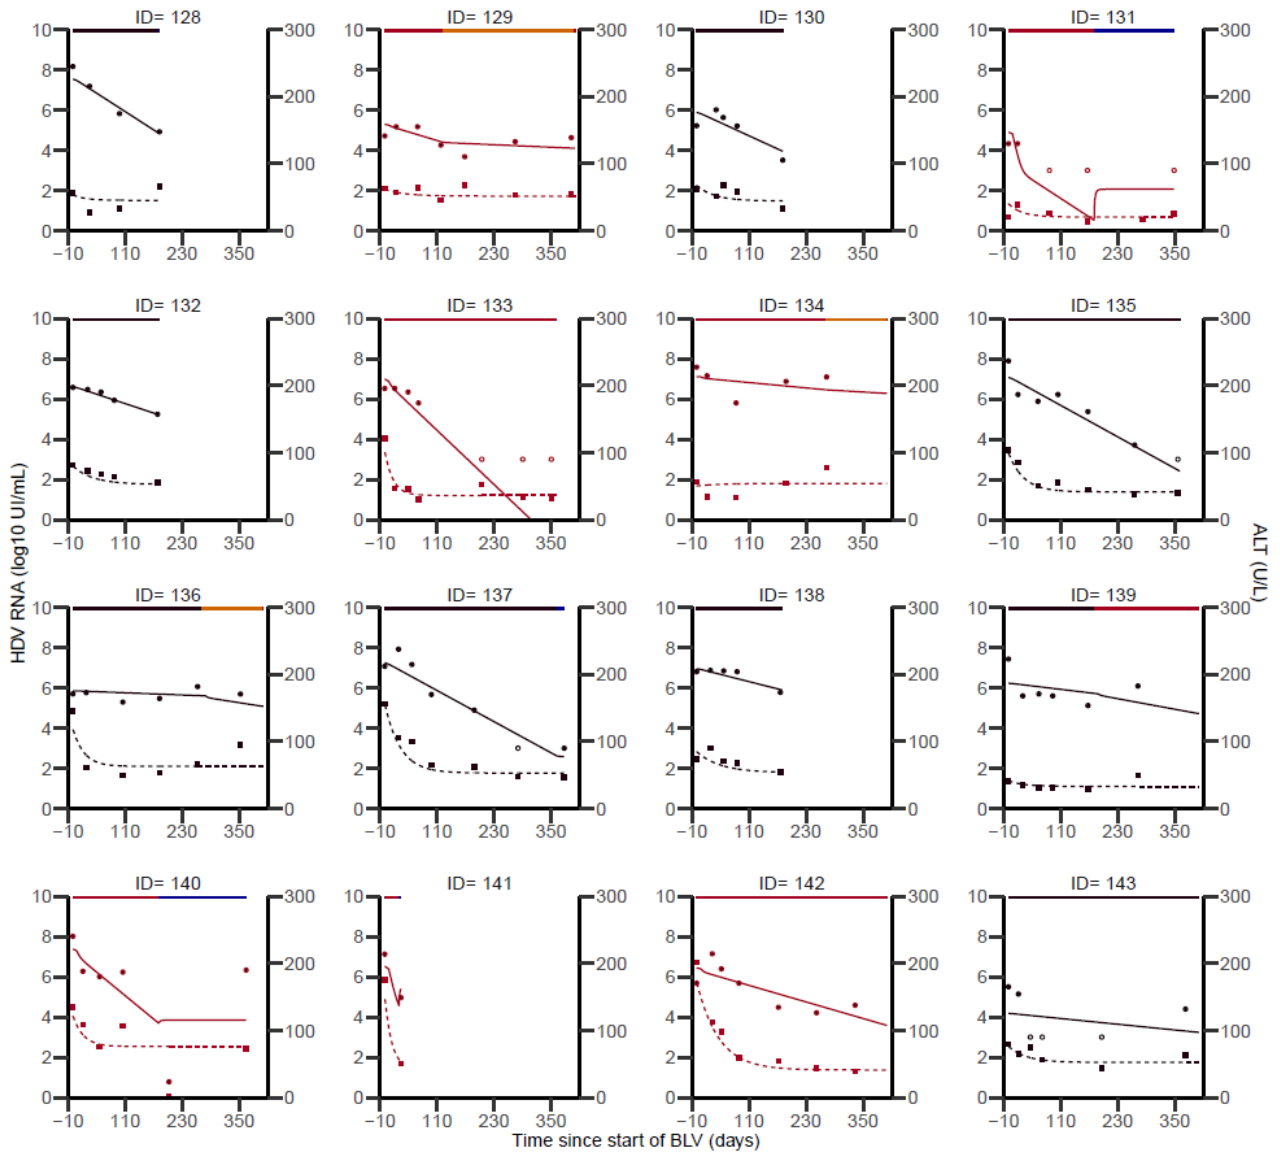

448  
 449 **Figure S14:** Individual predictions of HDV RNA (plain line) and ALT (dotted lines) in patients in the  
 450 group Bulevirtide (black lines) or bulevirtide+Peg-IFN (red lines). The top plain line indicates the  
 451 treatment received at each time (Red, Black, orange and blue for BLV+Peg-IFN, BLV only, Peg-  
 452 IFN only and off-treatment, respectively).

453  
 454  
 455  
 456  
 457  
 458  
 459

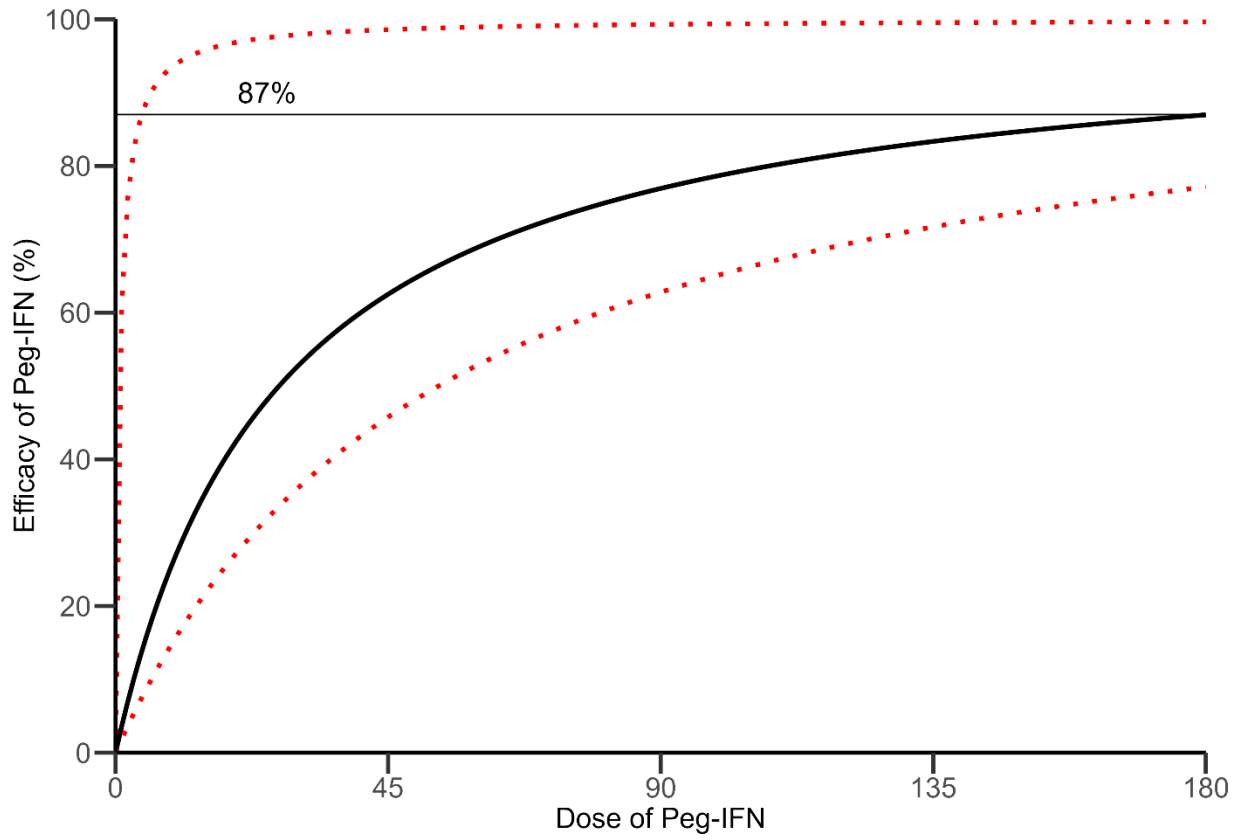

460  
461  
462  
463  
464  
465  
466  
467  
468  
469  
470

**Figure S15:** Relationship between the dose of Peg-IFN and the efficacy on blocking viral production in the sensitivity analysis taking into account the dose.

471 Tables

472 1. Limit of quantification

473

474 **Table S1** : Summary of the number of observation associated with the different limit of quantifications  
475 (LOQ) for HDV RNA available in our data.

| Limit of quantification (IU/mL) | Number of observations (n) |
|---------------------------------|----------------------------|
| 2                               | 117                        |
| 2.2                             | 13                         |
| 2.4                             | 3                          |
| 2.48                            | 3                          |
| 2.6                             | 4                          |
| 3                               | 141                        |

476

477

478

479

480

481

482

483 2. Estimation of treatment effect

484

485 **Table S2** : Results of the model building of drug inclusion

486

---

|                             |                                                                                           | <b>BIC</b> | <b>-2 LL</b> |
|-----------------------------|-------------------------------------------------------------------------------------------|------------|--------------|
| <i>Identifying the main</i> | Effect of BLV on $\beta$ only                                                             | 12567.07   | 12494.13     |
| <i>effect of Peg-IFN</i>    | Effect of BLV on $\beta$ + effect of Peg-IFN on $\beta$                                   | 12556.02   | 12472.67     |
|                             | Effect of BLV on $\beta$ + effect of Peg-IFN on $\delta$                                  | 12546.71   | 12463.36     |
|                             | Effect of BLV on $\beta$ + effect of Peg-IFN on $\rho$                                    | 12481.69   | 12398.34     |
| <i>Exploring additional</i> | Effect of BLV on $\beta$ + effect of Peg-IFN on $\rho$ +<br>effect of Peg-IFN on $\beta$  | 12480.88   | 12397.11     |
| <i>effects of Peg-IFN</i>   | Effect of BLV on $\beta$ + effect of Peg-IFN on $\rho$ +<br>effect of Peg-IFN on $\delta$ | 12490.00   | 12396.23     |

---

487

488

489

490

491

492

493

494

495

496

497

498

499

500

501

502

503

504

505 3. Sensitivity analysis taking into account the dose of Peg-IFN

506

507

**Table S3** : Parameters estimated in the sensitivity analysis accounting for the dose of Peg-IFN.

|                             |                                                           | Parameter estimate<br>(RSE%) | SD of the random<br>effect (RSE%) |
|-----------------------------|-----------------------------------------------------------|------------------------------|-----------------------------------|
| <i>Disease parameters</i>   |                                                           |                              |                                   |
| $\delta$                    | Loss rate of infected cells ( $d^{-1}$ )                  | $2.78 \cdot 10^{-2}$ (14.8)  | 0.814 (15.7)                      |
| $V_0$                       | Number of virions at baseline (log IU/mL)                 | 5.84 (2.15)                  | 1.39 (6.83)                       |
| $c_s$                       | ALT clearance ( $d^{-1}$ )                                | 2.38 (42.8)                  | 0.535 (101)                       |
| $A_0$                       | ALT value at baseline (U/L)                               | 123 (21.1)                   | 0.725 (8.9)                       |
| $A_{\text{co-young male}}$  | ALT value in absence of infection in young males (IU/L)   | 45.4 (9.01)                  | 0.528 (6.93)                      |
| $A_{\text{co-elderly}}$     | ALT value in absence of infection in elderly males (IU/L) | 58.4 (9.35)                  |                                   |
| $A_{\text{co-females}}$     | ALT value in absence of infection in young females (IU/L) | 35.9 (10.1)                  |                                   |
| <i>Drug effects</i>         |                                                           |                              |                                   |
| $\epsilon_s^{\text{BLV}}$   | Effect of BLV on blocking infection                       | 0.933 (10.7)                 | 5.25 (40.0)                       |
| $ED90^{\text{PEG}}$         | Effect of Peg-IFN on blocking viral production            | 243 (124)                    | 5.33 (32.8)                       |
| <i>Residual error model</i> |                                                           |                              |                                   |
| $a_{\text{HDV RNA}}$        | Additive residual error on HDV RNA ( $\log_{10}$ IU/mL)   | 0.754 (3.61)                 |                                   |
| $b_{\text{ALT}}$            | Proportional residual error on ALT                        | 0.310 (3.14)                 |                                   |

508

509

510

511

512

513

514

515



516 4. Model prediction : comparison to MY204 study

517

518 **Table S4** : Comparison of the prediction of the model in the intention-to-treat scenario versus MYR204.

519 The simulated LOQ was set to 50 IU/mL.

|                                              | <i>BLV+ PEG for 1y then BLV</i>          |                      | <i>BLV only (10 mg in MYR204, 2mg in the predictions)</i> |                    |
|----------------------------------------------|------------------------------------------|----------------------|-----------------------------------------------------------|--------------------|
|                                              | <i>Median predictions from the model</i> | <i>Myr 204</i>       | <i>Median predictions from the model</i>                  | <i>Myr 204</i>     |
| <b>Undetectable VL EoT</b>                   | 55%                                      | 44% (CI = [30 ; 60]) | 44%                                                       | 22% (CI=[15 ; 38]) |
| <b>Undetectable VL 24 FU (or Viral cure)</b> | 25%                                      | 32% (IC=[20 ; 45])   | 20%                                                       | 12% (CI=[5 ; 25])  |
| <b>ALT normalisation</b>                     | 40%                                      | 42% (IC=[30 ; 58])   | 39%                                                       | 30% (CI=[20 ; 45]) |

520

521

522

523

524

525

526

527

528

529

530

531

532

533

534

535

536

537

538

539

540

541
