# Supplementary material for: Effect of Peg-IFN on the viral kinetics of patients with HDV infection treated with bulevirtide
Source: PubMed Central journal article supplement — JHEP Rep. 2024 Mar 24;6(8):101070. doi: 10.1016/j.jhepr.2024.101070 (PMC11295569; doi:10.1016/j.jhepr.2024.101070), 2024-03-24
Supplement: mmc4.pdf [file mmc4.pdf]

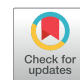

# Effect of Peg-IFN on the viral kinetics of patients with HDV infection treated with bulevirtide

Selma El Messaoudi,<sup>1,\*</sup> Ségolène Brichtler,<sup>2</sup> Claire Fougerou-Leurent,<sup>3,4</sup> Emmanuel Gordien,<sup>2</sup> Athenaïs Gerber,<sup>2</sup> Amal Kortebi,<sup>3,4</sup> Garance Lagadic,<sup>3,4</sup> Miroslava Subic-Levrero,<sup>5</sup> Sophie Metivier,<sup>6</sup> Stanislas Pol,<sup>7</sup> Anne Minello,<sup>8</sup> Vlad Ratziu,<sup>9</sup> Vincent Leroy,<sup>10</sup> Philippe Mathurin,<sup>11</sup> Laurent Alric,<sup>12</sup> Fatoumata Coulibaly,<sup>13</sup> Jean-Michel Pawlotsky,<sup>14</sup> Fabien Zoulim,<sup>5</sup> Victor de Lédighen,<sup>15,†</sup> Jérémie Guedj<sup>1,†</sup>, the ANRS HD EP01 BULEDELTA Study Group

<sup>1</sup>Université Paris Cité, IAME, Inserm, Paris, France; <sup>2</sup>National Reference Center for Viral Hepatitis B, C, and D, Department of Clinical Microbiology, Hôpital Avicenne AP-HP, Université Sorbonne Paris Nord, Bobigny, INSERM U955, Créteil, France; <sup>3</sup>Clinical Pharmacology Department, CHU Rennes, Rennes, France; <sup>4</sup>CIC 1414 (Clinical Investigation Center), INSERM, Rennes, France; <sup>5</sup>Department of Hepatology, Hospices Civils de Lyon; INSERM Unit 1052; Université Claude Bernard Lyon 1, France; <sup>6</sup>Department of Hepatology, CHU Rangueil, Toulouse, France; <sup>7</sup>Department of Hepatology, Hôpital Cochin, AP-HP, Université Paris-René Descartes, INSERM U1016, Paris, France; <sup>8</sup>Department of Hepatology and Gastroenterology, University hospital Dijon, INSERM UMR 1231, France; <sup>9</sup>Sorbonne Université, Assistance Publique-Hôpitaux de Paris, Hôpital Pitié Salpêtrière, Institute of Cardiometabolism and Nutrition (ICAN), Paris, France; <sup>10</sup>Department of Hepatology and Gastroenterology, Centre Hospitalo-Universitaire, INSERM U1209, Université Grenoble Alpes, Grenoble, France; <sup>11</sup>Service des maladies de l'appareil digestif, Université Lille 2 and Inserm U795, Lille, France; <sup>12</sup>Department of Internal Medicine and Digestive Diseases, UMR-152, Toulouse III University, Toulouse, France; <sup>13</sup>Clinical research department, ANRS Maladies infectieuses émergentes, Paris, France; <sup>14</sup>National Reference Center for Viral Hepatitis B, C, and D, Department of Virology, Hôpital Henri Mondor, Université Paris-Est, Inserm U955, Créteil, France; <sup>15</sup>Centre d'Investigation de la Fibrose Hépatique, Bordeaux University Hospital, Pessac, France; INSERM U1312, Bordeaux University, Bordeaux, France

JHEP Reports 2024. <https://doi.org/10.1016/j.jhepr.2024.101070>

**Background & Aims:** Bulevirtide is a first-in-class entry inhibitor antiviral treatment for chronic hepatitis D. The viral kinetics during bulevirtide therapy and the effect of combining bulevirtide with pegylated-interferon (Peg-IFN) are unknown.

**Methods:** We used mathematical modelling to analyze the viral kinetics in two French observational cohorts of 183 patients receiving bulevirtide with or without Peg-IFN for 48 weeks.

**Results:** The efficacy of bulevirtide in blocking cell infection was estimated to 90.3%, whereas Peg-IFN blocked viral production with an efficacy of 92.4%, albeit with large inter-individual variabilities. The addition of Peg-IFN to bulevirtide was associated with a more rapid virological decline, with a rate of virological response (>2 log of decline or undetectability) at week 48 of 86.9% (95% prediction interval [PI] = [79.7–95.0]), compared with 56.1% (95% PI = [46.4–66.7]) with bulevirtide only. The model was also used to predict the probability to achieve a cure of viral infection, with a rate of 8.8% (95% PI = [3.5–13.2]) with bulevirtide compared with 18.8% (95% PI = [11.6–29.0]) with bulevirtide + Peg-IFN. Mathematical modelling suggests that after 144 weeks of treatment, the rates of viral cure could be 42.1% (95% PI = [33.3–52.6]) with bulevirtide and 66.7% (95% PI = [56.5–76.8]) with bulevirtide + Peg-IFN.

**Conclusions:** In this analysis of real-world data, Peg-IFN strongly enhanced the kinetics of viral decline in patients treated with bulevirtide. Randomized clinical trials are warranted to assess the virological and clinical benefit of this combination, and to identify predictors of poor response to treatment.

**Impact and implications:** Bulevirtide has been approved for chronic HDV infection by regulatory agencies in Europe based on its good safety profile and rapid virological response after treatment initiation, but the optimal duration of treatment and the chance to achieve a sustained virological response remain unknown. The results presented in this study have a high impact for clinicians and investigators as they provide important knowledge on the long-term virological benefits of a combination of Peg-IFN and bulevirtide in patients with CHD. Clinical trials are now warranted to confirm those predictions.

© 2024 The Authors. Published by Elsevier B.V. on behalf of European Association for the Study of the Liver (EASL). This is an open access article under the CC BY-NC-ND license (<http://creativecommons.org/licenses/by-nc-nd/4.0/>).

Keywords: Viral kinetics; Hepatitis delta virus; Antiviral treatment; Peg-IFN; Bulevirtide.

Received 30 January 2024; received in revised form 12 March 2024; accepted 14 March 2024; available online 24 March 2024

<sup>†</sup> Contributed equally.

\* Corresponding author. Address: Université Paris Cité, IAME, Inserm, 16 rue Henri Huchard, 75018 Paris, France.

E-mail address: [selma.el-messaoudi@inserm.fr](mailto:selma.el-messaoudi@inserm.fr) (S. El Messaoudi).

## Introduction

Chronic HBV infection is a major global burden affecting approximately 300 million people worldwide.<sup>1</sup> Although antiviral treatments are effective to suppress viral replication and reduce the risk of liver disease, they do not lead to viral eradication, and infected cells continue to produce viral proteins such as HBsAg.<sup>2</sup>

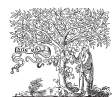

A major complication of HBV infection is the coinfection at the acute stage or superinfection at the chronic carrier stage with HDV. Chronic HDV infection affects at least 15–20 million HBV-carriers worldwide.<sup>3</sup> HDV is a small defective single-stranded RNA virus that requires the presence of empty HBV envelopes carrying HBsAg to infect hepatocytes.<sup>4</sup> Chronic HBV/HDV infection is responsible for the most severe form of chronic viral hepatitis, leading to high rates of cirrhosis, decompensation of cirrhosis, and hepatocellular carcinoma.<sup>5</sup>

Chronic HDV infection (CHD) is still considered as an orphan disease in most parts of the world and the therapeutic options to treat its related liver disease are limited. Until recently the only, yet unapproved, treatment was pegylated interferon (Peg-IFN),<sup>6,7</sup> which has shown poor tolerance and disappointing efficacy, with high rates of relapse after treatment cessation,<sup>8,9</sup> even after several years of treatment.<sup>8</sup> The heterogeneity of patients response to Peg-IFN makes it difficult to estimate its precise impact on HDV RNA kinetics, with estimates of viral undetectability after 48 weeks of treatment ranging from 13% to 41%,<sup>8,10–14</sup> and a rate of virological response (defined as a decline superior to 2 log from baseline or undetectable HDV RNA at week 48) of approximately 40%.<sup>12</sup> In 2020, bulevirtide (BLV, previously known as Myrcludex B) has been conditionally approved by the European Medicines Agency at a dose of 2 mg/day subcutaneously (Hepcludex<sup>®</sup>). BLV is a synthetic lipopeptide corresponding to the 47 N-terminal amino acids of the pre-S1 domain of the large HBsAg protein. It is a first-in-class entry inhibitor that acts by blocking the binding of HDV envelope to the sodium/bile acid cotransporter (NTCP), a membrane receptor responsible for the entry of both HBV and HDV into the hepatocytes through its fixation with the HBV envelope.<sup>15</sup> In phase III clinical trials, BLV at a dose of 2 mg daily has shown promising results, with a rate of virological response of 71% and a rate of viral undetectability of 12% after 48 weeks of treatment.<sup>16</sup> Only few results have been published regarding viral dynamics after treatment cessation, but they suggest that the vast majority of patients experience relapse.<sup>17,18</sup> Studies are ongoing to evaluate virological and clinical effects on longer periods.

BLV has been approved by regulatory agencies as a monotherapy, and the combination of BLV and Peg-IFN has not yet been clinically evaluated in large studies. The virological response of the combination in randomized clinical trials have been so far heterogeneous with rates of viral undetectability ranging from 44% in MYR204<sup>19</sup> to 60% in MYR203<sup>20</sup> after 48 weeks of treatments, but both of these results were obtained on a small number of patients.<sup>21,22</sup> In France, where off-label treatments can be reimbursed by the healthcare system, BLV can be used either alone or in combination with Peg-IFN, at the prescriber's discretion. Patients receiving BLV have been enrolled in two separate, multicentre, retrospective, and prospective cohorts, from which we obtained a unique dataset, allowing us to compare the viral kinetics in patients receiving BLV alone or in combination with Peg-IFN.

Mathematical models have been largely used to decipher and predict the outcome of treatments against hepatitis B, C, or D.<sup>23–33</sup> In the case of HCV, these tools provided important insights regarding treatment duration and the time needed to cure viral infection, *i.e.* achieve a sustained virological response.<sup>25,34,35</sup> Such models can be used to emulate various therapeutic strategies. In this modelling analysis, we aimed to characterize the viral kinetics in patients treated for 48 weeks with BLV alone or in combination with Peg-IFN. We predicted the

potential of the combination to improve the rate of viral cure with longer term administration.<sup>23,25,34,36</sup>

## Materials and methods

### Design of the study

We used data from two French multicentric cohort studies that assessed the efficacy of BLV alone or in combination with Peg-IFN alfa: (1) the French Early Access Program (cATU) and (2) the ANRS HD EP01 BuleDelta study (NCT04166266). The following analysis was performed gathering the data from those two cohorts.

The cATU study was a prospective cohort study, conducted between September 2019 (initiation of the compassionate access program of BLV in France) and September 2020 (conditional marketing authorization) and funded by MYR GmbH (now Gilead Sciences). It included patients with CHD with detectable HDV RNA or anti-HDV antibodies. Inclusion criteria were adults with either a compensated cirrhosis or a high fibrosis (>F3 evaluated with liver biopsy or Fibroscan<sup>®</sup>), or moderate fibrosis (F2) with persistent cytolysis (alanine transaminase [ALT] values > 2 × upper limit of normal for >6 months). BuleDelta study has been initiated in 2019 and was funded and sponsored by ANRS|MIE. BuleDelta study started the inclusions in February 2020 and is still ongoing with prospective and retrospective inclusions of patients with CHD already treated or with an indication for treatment with BLV. Inclusion criteria were adults with compensated liver disease with detectable HDV RNA in plasma or serum.

In both cases, BLV was administered at a dose of 2 mg subcutaneously once daily, as a monotherapy (BLV group) or in combination with Peg-IFN (BLV + Peg-IFN group) once weekly subcutaneously at a dose of 45–180 µg weekly according to physician's choice. Treatment changes, such as the cessation of BLV or Peg-IFN, as well as dose adjustments could be made at the physician's discretion throughout the study. As inclusions could be retrospective in both cases, some patients were enrolled in both studies (Fig. 1). All patients either gave written informed consent or received an information note to participate in these studies.

### Data included in the viral kinetic analysis

Our viral kinetic analysis focused on the virological and biochemical responses during the first 48 weeks of treatment. HDV RNA, HBV DNA, ALT, and HBsAg were measured at week 0 (BLV initiation), 4, 8, 12, 24, 36 and 48 (Fig. S1). Baseline clinical characteristics included age, sex, BMI, HBeAg-status, the presence or absence of cirrhosis, concomitant medication with nucleos(t)ide analogs (NUCs), Fibroscan<sup>®</sup> and platelet count (Table 1, Figs. S2 and S3).

Data obtained after 48 weeks of treatment were excluded, and all data provided before 48 weeks (on- and off-treatment) were taken into account in our analysis (Fig. S4). Patients that were already receiving anti-HDV treatment (*e.g.* Peg-IFN) at the time of inclusion were excluded. We focused our analysis on patients receiving BLV 2 mg (alone or in combination) and data obtained after a potential dose adjustment to 10 mg were excluded. Doses of Peg-IFN were not available for all patients and therefore were not taken into account in the main analysis. However, a subanalysis was performed using only patients for whom the dose was available (Table S1, Figs. S5 and S6). Viral measurements and quantification levels were heterogeneous, with lower limit of quantification (LLOQ) ranging from 100 to

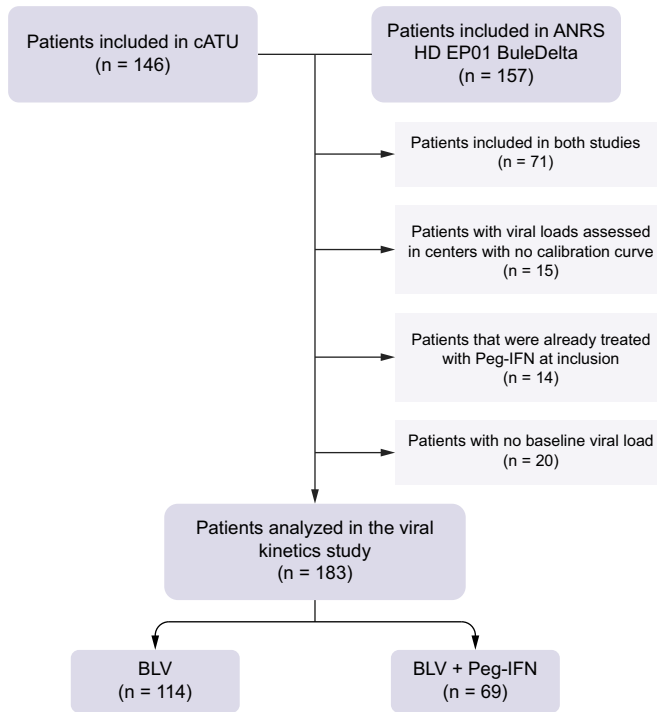

**Fig. 1. Flowchart of the viral kinetics study.** BLV, bulevirtide; Peg-IFN, pegylated interferon.

1,000 IU/ml depending on the centre in which the data were analyzed (Table S2).

Calibration curves provided by the French National Reference Center on HDV (Figs S7 and S8) were used to ensure comparability in HDV RNA measurements across centres. Data originating from centres for which no calibration curves were available were not analyzed.

### Model of HDV and ALT dynamics during BLV therapy

The model is a standard target cell limited model with a pool of target cells (T, HBV mono infected cells) that can be infected by

HDV virions (V) at a rate  $\beta$  and become HDV-HBV coinfecting cells (I). We assumed that T was constant over the study period infection, remaining at its pre-treatment steady-state value,  $T_0$ . BLV acts by blocking cell entry with effectiveness noted  $\eta$ , infected cells are lost at rate  $\delta$ , and produce p virions per day, which are cleared at rate c (Eqs 1 and 2):

$$\frac{dI}{dt} = \beta(1-\eta) VT_0 - \delta I \tag{1}$$

$$\frac{dV}{dt} = pI - cV \tag{2}$$

$$\frac{dA}{dt} = s + a\delta I - c_a A \tag{3}$$

Following the model developed by Ribeiro *et al.*,<sup>37</sup> we also incorporated the dynamics of ALT (A). In this model, ALT is produced at a zero order (s) by dying cells, and are therefore proportional (a) to the loss rate of both HDV/HBV infected cells ( $\delta$ ) and susceptible cells (Eq. 3). Assuming that the number of cell infections was small after treatment initiation, A could be expressed using an analytical solution, where  $c_a$ ,  $A_0$  and  $A_\infty$  are the clearance, the value at baseline and the value in absence of infection of ALT, respectively (Eq. 4).

$$A(t) = A_\infty \left[ 1 - \frac{A_0 - A_\infty}{A_\infty (c_a - \delta)} (\delta e^{-c_a t} - e^{-\delta t}) \right] \tag{4}$$

To ensure model identifiability, a number of hypotheses were done. First, as HDV infection is generally associated with suppression of HBV replication, we neglected the impact of HBV viral replication on HDV kinetics. We also assumed that all hepatocytes were infected with HBV<sup>38</sup> and the total population of HDV susceptible cells was therefore equal to  $T_0 = c/\beta p$ .<sup>39</sup> Without loss of generality<sup>40,41</sup> the infectivity rate ( $\beta$ ) and the rate of production of HDV RNA by infected cells (p) were also fixed to  $10^{-7}$  ml.RNA<sup>-1</sup>.day<sup>-1</sup> and  $10$  RNA cell<sup>-1</sup>.day<sup>-1</sup>.<sup>40</sup> Considering that no early HDV RNA observations were available after treatment initiation, the clearance of HDV RNA was also fixed to  $0.24$  day<sup>-1</sup> based on previous analysis.<sup>41</sup> At baseline, the concentration of virions ( $V_0$ ) was estimated on a logarithmic scale.

**Table 1. Baseline characteristics of the patients included in the analysis.**

|                                                            | Missing data (N) | BLV (n=114)      | BLV+Peg-IFN (n=69) | p value* |
|------------------------------------------------------------|------------------|------------------|--------------------|----------|
| <b>Clinical characteristics</b>                            |                  |                  |                    |          |
| Age <sup>†</sup> , years                                   |                  | 42 [35–51]       | 42 [36–51]         | 0.8      |
| Female <sup>‡</sup>                                        |                  | 37 (32)          | 23 (33)            | 0.9      |
| BMI <sup>†</sup> , kg/m <sup>2</sup>                       | 26               | 25.1 [22.3–27.6] | 24.5 [22.5–28.2]   | 0.8      |
| HIV <sup>‡</sup>                                           | 2                | 21 (19)          | 8 (12)             | 0.2      |
| Liver stiffness measurement (FibroScan <sup>®</sup> ), kPa | 64               | 12 [9–19]        | 11 [8–17]          | 0.3      |
| Cirrhosis <sup>‡</sup>                                     |                  | 83 (73)          | 52 (75)            | 0.7      |
| Platelets <sup>†</sup> , per cm <sup>3</sup>               | 5                | 144 [83–196]     | 163 [122–230]      | 0.01     |
| Co-medication with NUC <sup>‡</sup>                        |                  | 97 (85)          | 51 (74)            | 0.06     |
| <b>Viral and biochemical characteristics</b>               |                  |                  |                    |          |
| HBeAg-negative <sup>‡</sup>                                | 35               | 74 (85)          | 56 (92)            | 0.2      |
| HDV RNA <sup>†</sup> (log <sub>10</sub> IU/ml)             |                  | 6.5 [5.3–6.9]    | 6.7 [5.5–7.3]      | 0.3      |
| Undetectable HBV DNA <sup>‡</sup>                          | 15               | 88 (81)          | 36 (60)            | 0.03     |
| HBsAg <sup>†</sup> (log <sub>10</sub> IU/ml)               | 111              | 3.7 [2.9–4.1]    | 3.7 [3.4–4.1]      | 0.5      |
| ALT <sup>†</sup> (IU/L)                                    | 3                | 78 [51.8–119]    | 84 [54.5–143]      | 0.5      |
| Follow up <sup>†</sup> , days                              |                  | 335 [273–358]    | 341 [331–331]      | 0.2      |

ALT, alanine transaminase; BLV, bulevirtide; NUC, nucleos(t)ide analogs; Peg-IFN, pegylated interferon.

\* Wilcoxon test; Pearson's test.

† Median [IQR].

‡ n (%).

### Estimating effects of Peg-IFN

No *a priori* hypothesis was made for Peg-IFN, which could either block viral production, enhance the loss rate of target cells and/or infected cells, or block cell infection with a pharmacological delay fixed to 8.5 days.<sup>41</sup> For the latter, a multiplicative effect was assumed for the addition of Peg-IFN to BLV. The efficacy of Peg-IFN and/or BLV were set to 0 after treatment interruption. To include the drug effects, a forward selection was performed, where at each step, the model providing the best improvement of likelihood was kept (Table S3), and the procedure continued until no significant improvement was found, using a likelihood-ratio test (LRT,  $p < 5\%$ ).

After the selection of the drug effects, only those that were properly estimated (relative standard error <50%) were kept.

### Building the model of inter-patient variability

After inclusion of the drug effects, a screening was performed to test for association between baseline characteristics and individual parameters. Only baseline covariates with <15% missing data were tested. Patients for whom covariates information were missing were excluded in this step. Continuous covariates were transformed into categorical covariates, based on the median observed in the population. Significant association ( $p < 1\%$  on a Wilcoxon test) were retained. On those pre-selected associations, a forward procedure based on a LRT ( $p < 5\%$ ) was then done, followed by a backward selection ( $p < 1\%$ ) to include the most significant covariate effects.

### Treatment discontinuation

We estimated the probability for each treatment to be discontinued, using an exponential survival model (Fig. S9). A joint model was also tested to evaluate the association between the virological response and the probability of treatment discontinuation.

### Statistical model

HDV RNA log-transformed observations and ALT levels were simultaneously fitted from the solution of our model. The longitudinal data were analyzed with a population approach using non-linear mixed effect models. The model used to describe for each individual  $i$  ( $i = 1, \dots, N$ ) the  $j^{\text{th}}$  observation ( $j = 1, \dots, N_i$ ), in the  $k^{\text{th}}$  marker at time  $t_{ijk}$  was:

$$Y_{ijk} = f(\theta_i, t_{ijk}) + e_{ijk}$$

with  $\theta_i$  the vector of parameters of individual  $i$  and  $e_{ijk}$  the residual error of patient  $i$  at observation  $j$  for each  $k$  marker, assumed to follow a normal distribution centred on zero and a variance equal to  $\sigma^2$ . We assumed an additive error on the HDV log-transformed observations, and tested based on an LRT both a combined and proportional error on ALT levels.

Fixed effects were described by  $\mu$  the vector of population parameters, whereas  $\eta_i$  was the vector of random effects describing inter-individual variability, with variance-covariance matrix  $\Omega^2$ , and  $z_i$  the vector of individual baseline covariates.

All disease parameters followed a log-normal distribution, and the treatment effects followed a logit-normal distribution. Parameter estimation was performed using a stochastic approximation expectation–minimization (SAEM) algorithm implemented in Monolix software, version 2018 R2 ([www.lixoft.com](http://www.lixoft.com)).

### Predicting virological responses with long-term BLV administration

We focused our analysis on the virological response, defined as a virological decline of more than 2 logs or undetectable HDV RNA (with a limit of quantification of  $2 \log_{10}$  IU/mL) and the combined response, defined as a virological and a biochemical response (normalization of transaminases with ALT values lower than 40 IU/L).

Using the parameters estimated, we calculated the proportion of patients achieving a response after 48, 96, and 144 weeks of therapy. We compared the outcome in a group treated with monotherapy, with the combination, or with the combination for 48 weeks and the monotherapy afterwards (designated as intermediate strategy).

Results were given assuming either that (i) all patients would stay on treatment (per protocol scenario) or (ii) they could discontinue therapy (intention-to-treat scenario) with the same rate than observed in our data (see above). In the latter, treatment efficacy was set to 0 after treatment interruption.

We also used the model to project the cure of viral infection. For this purpose, we used the concept of cure boundary developed in HCV,<sup>34,36</sup> which is the theoretical viral concentration corresponding to having less than one virus particle in the whole body ( $< 10^{-4.22}$  IU/ml).

To account for variability, 500 simulations were done using the same number of patients and the patients' characteristics as in the original dataset in each group, and we reported the median, 5 and 95 percentiles. The simulation was performed using Simulx software ([www.lixoft.com](http://www.lixoft.com)).

## Results

### Patients included and population characteristics

A total of 183 patients were included in our viral kinetic analysis, 114 treated with BLV alone and 69 with BLV + Peg-IFN (Fig. 1). Most patients were males (68% and 67% in the monotherapy and combination therapy group, respectively) with a median age of 42 years and negative for HBeAg (85% and 92% in the monotherapy and combination therapy group, respectively). The majority of patients had cirrhosis (73% and 75% in the monotherapy and combination therapy group, respectively), whereas coinfection with HIV was present in 19% and 12% in the monotherapy and combination therapy groups, respectively. Overall, and to the exception of the platelet counts, which was significantly higher in the combination group ( $p = 0.01$ ), the baseline clinical characteristics were balanced between the two groups (Table 1). At inclusion, the proportion of patients that were chronically treated with NUCs was slightly higher in the monotherapy group than in the combination treatment group (85% and 74%, respectively,  $p = 0.06$ ). Consequently, the proportion of undetectable HBV DNA was significantly higher ( $p = 0.03$ ) in the group treated with monotherapy (81% and 60% in the BLV and BLV + Peg-IFN groups, respectively). There were no significant differences in viral levels in both groups, with median levels of HDV RNA, ALT, and HBeAg in the monotherapy group of 6.5 log IU/mL, 78 U/L, and 3.7 log IU/mL, respectively, compared with 6.7 log IU/mL, 84 U/L, and 3.7 log IU/mL in the combination treatment group, respectively.

### Data included in the viral kinetic analysis

Among the 183 patients included at baseline, 150 received a treatment for the total duration of the study (48 weeks). The

majority (N = 131) continued treatment with no interruption, and 19 had one or more temporary interruptions. A total of 33 patients terminated treatment before week 48 (Fig. 2).

Among the 80 patients that received BLV + Peg-IFN throughout the whole analysis, the exact dose of Peg-IFN received was informed at all times in 46 patients. Among these patients, 1, 10, 6 and 29 patients received a dose of 45, 90, 135 and 180 mg/kg at treatment initiation, respectively. The dose was modified at least one time in 10 patients and the detail is given in Figs. S5 and S6.

**Virological and biochemical response during therapy**

In both groups, the virological (HDV RNA) and biochemical (ALT) changes from baseline were statistically significant after 48

weeks of treatment ( $p < 0.0001$ ), whereas no significant change was observed in the levels of HBsAg and HBV DNA (Figs. S10 and S11). The virological response (defined as a decline in viral load  $> 2$  log or undetectability) was significantly more frequent in patients receiving BLV + Peg-IFN, with rates equal to 29.3% after 4 weeks, 83.9% after 12 weeks, 85.2% after 24 weeks, 79.2% after 36 weeks, and 83.3% after 48 weeks, compared with 7.8%, 32.2%, 52.6%, 54.7%, and 66.2% (all  $p < 0.01$ ) in patients receiving BLV alone, respectively.

Accordingly, the proportion of undetectable HDV RNA was higher in the combination group, with rates equal to 10.3%, 47.5%, 64.9%, 62.3%, and 68.5% after 8, 12, 24, 36, and 48 weeks respectively, compared with 5.6%, 18.4%, 26.8%, 34.9, and 36.5% in

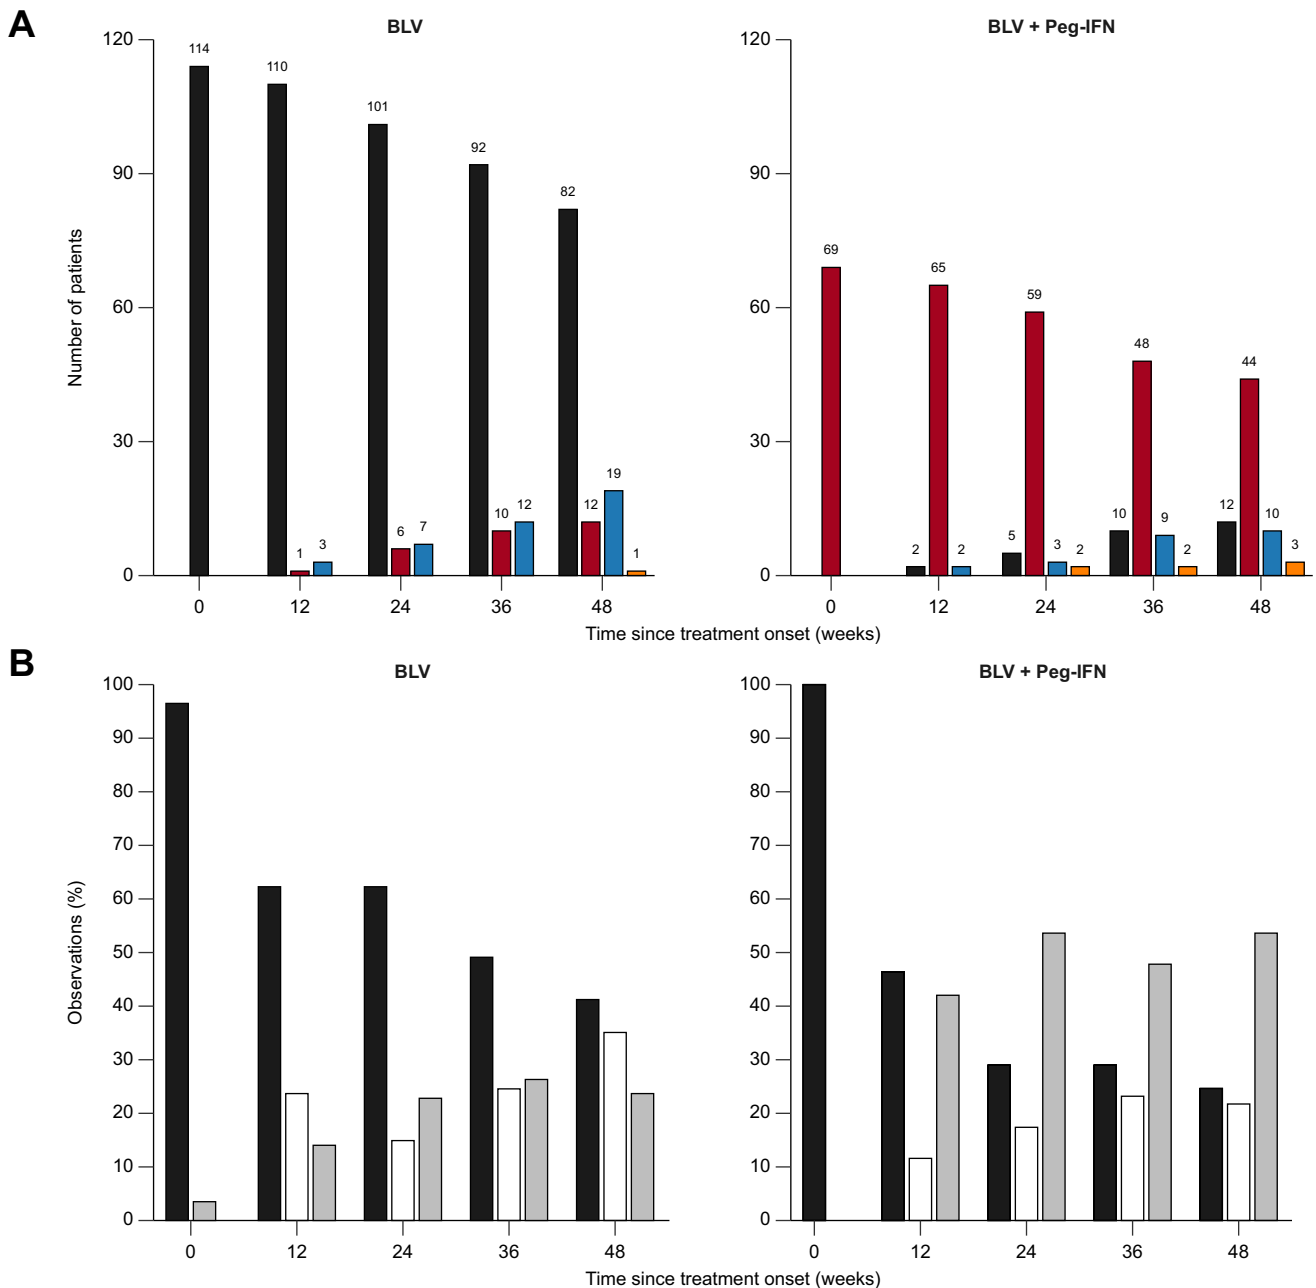

**Fig. 2. Patient treatments and observations.** (A) Number of patients treated with BLV alone (black), BLV + Peg-IFN (red), Peg-IFN alone (orange) and off-treatment (blue). (B) Corresponding proportion of observations. Black bars correspond to detectable HDV RNA, gray bars represent undetectable HDV RNA, white bars represent the proportion of unavailable data at each time. BLV, bulevirtide; Peg-IFN, pegylated interferon.

the monotherapy group. No significant difference was observed in the level of transaminases between the two groups. The observed virological declines are shown in Fig. 3.

### Viral kinetics parameters and antiviral effect of BLV and Peg-IFN

The efficacy of BLV in blocking cell infection was estimated to 90.3%, albeit with a large uncertainty (95% CI = [28.3–99.5]). The main mechanism of action of Peg-IFN was blocking viral production, with an efficacy estimated to 92.4% (95% CI = [73.4–98.2]). It is noteworthy that this estimated value corresponds to a mean estimate in the population, which masks large variability across individuals. Indeed, the efficacy of BLV and Peg-IFN was <50% in 29% and 21% of individuals, respectively, suggesting that these treatments had very limited antiviral activity in a substantial proportion of patients (Figs. S12 and S13). No additional effect of Peg-IFN on the loss rates of susceptible or infected cells, nor on blocking cell infection was found (Table S3).

Consequently, the model predicts that BLV monotherapy leads to a monophasic viral decline (Fig. 4), driven by the loss rate of infected cells ( $\delta$ ), estimated to  $0.030 \text{ day}^{-1}$ , corresponding to a half-life of 23 days (Table 2). In contrast, patients treated with BLV + Peg-IFN mostly had a biphasic decline, with a first phase driven by

the clearance of free virions (c), fixed to be  $0.24 \text{ day}^{-1}$ , corresponding to a half-life of 2.9 days, and a final phase driven by  $\delta$ .

With less infected cells over time, ALT was cleared at a rate ( $c_a$ ) equal to  $1.56 \text{ day}^{-1}$ , corresponding to a half-life of 0.44 day, and declined continuously from a level of 102 ( $A_0$ ) to 42 IU/L ( $A_\infty$ ) in young males (defined as younger than 42 years of age). We estimated a 0.76-fold decrease and a 1.3-fold increase in the levels of ALT at baseline, respectively, in females and older patients ( $p < 0.01$ ). The dynamics of ALT was not impacted by the drugs and no differences across groups could be highlighted (Figs. S10 and S11).

### Prediction of virological response after 48–144 weeks of treatment

The addition of Peg-IFN to BLV translated into an improved response in the long-term.

In the per protocol scenario, assuming no treatment cessation, the rate of virological response after 48 weeks was predicted to be 56.1% (95% prediction interval [PI] = [47.4–66.7]) in patients treated with BLV, and 86.9% (95% PI = [79.7–95.0]) in patients treated with BLV + Peg-IFN. These rates would increase progressively to reach after 144 weeks rates of 75.4% (95% PI = [66.7–82.4]) and 95.6% (95% PI = [91.3–100]), respectively

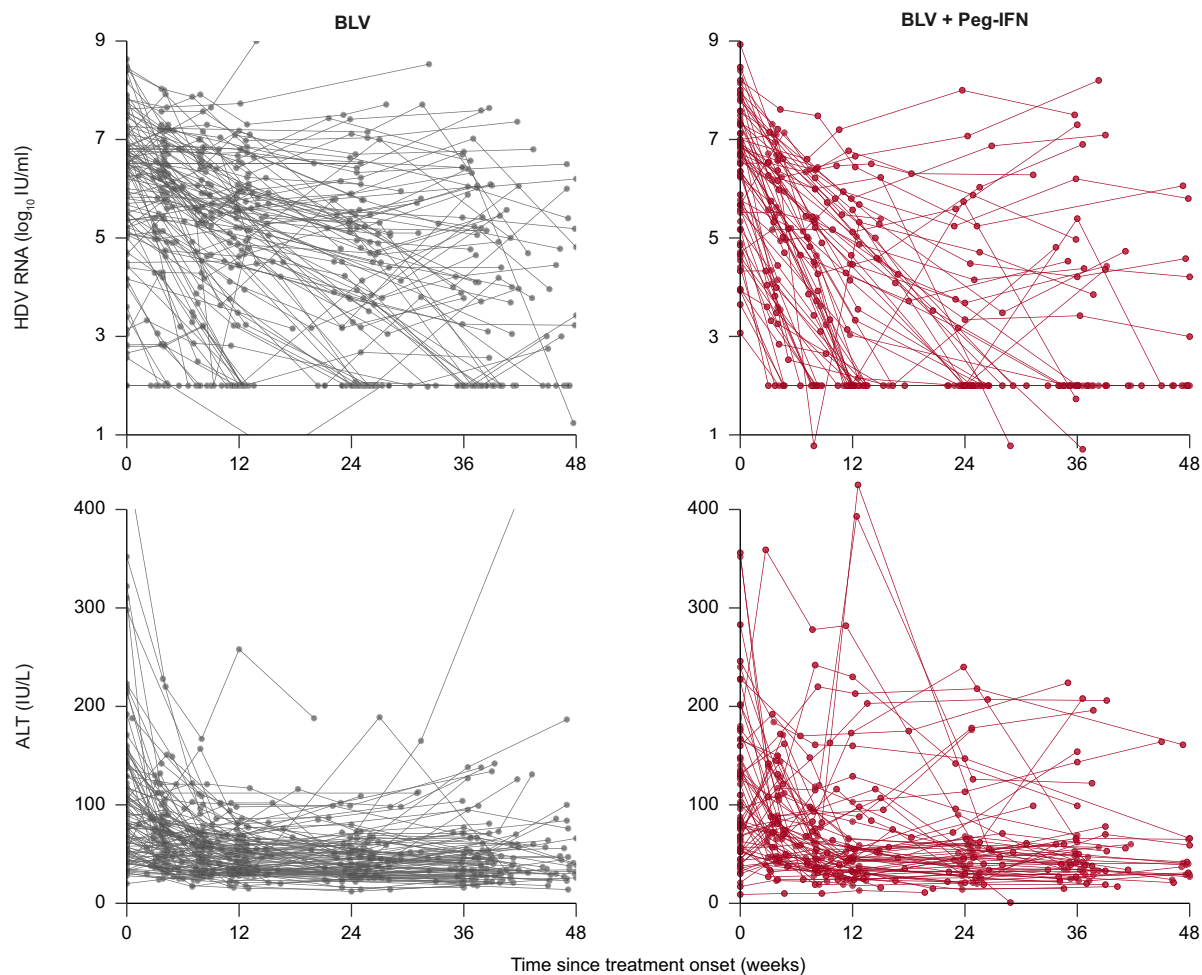

**Fig. 3.** Viral and biochemical kinetics observed during 48 weeks of treatment with BLV alone (BLV) or in combination with Peg-IFN (BLV + Peg-IFN). ALT, alanine transaminase; BLV, bulevirtide; Peg-IFN, pegylated interferon.

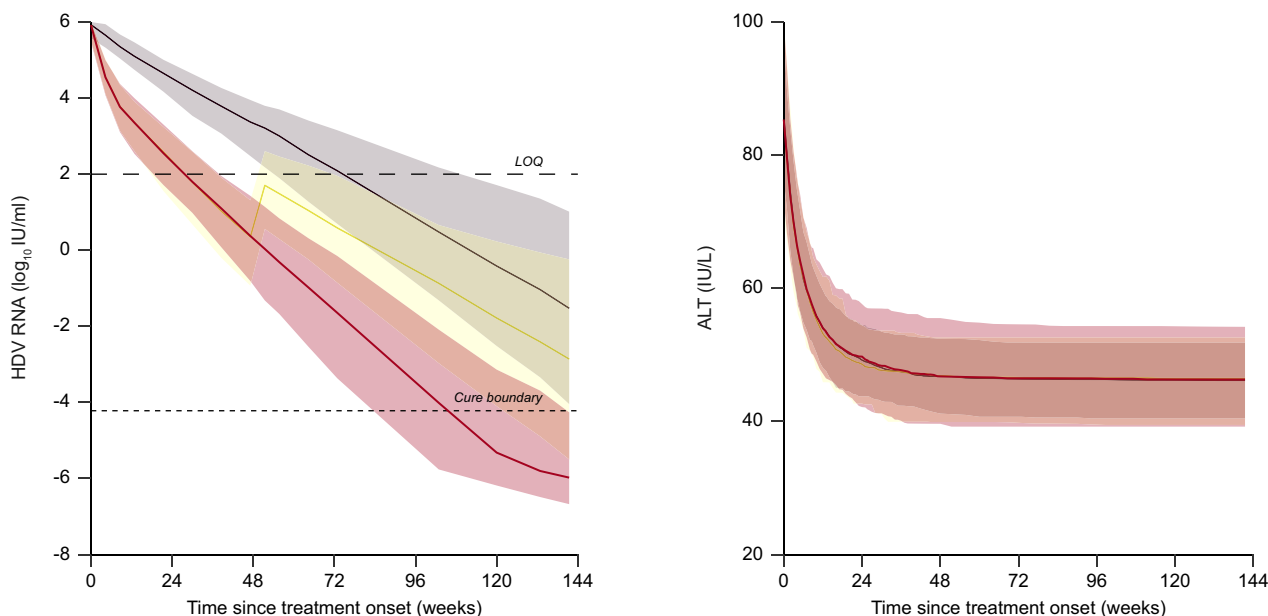

**Fig. 4. Long-term viral and biochemical kinetics predicted by the mathematical model in patients receiving BLV (black), BLV + Peg-IFN for 144 weeks (red), and BLV + Peg-IFN for 48 weeks, followed by BLV alone afterwards (yellow).** The plain line and its shaded area represent the median prediction of 500 simulated data sets and its 95% prediction interval. ALT, alanine transaminase; BLV, bulevirtide; Peg-IFN, pegylated interferon.

(Fig. 5A). In an intermediate treatment strategy of BLV + Peg-IFN for 48 weeks followed by BLV monotherapy afterwards, the predicted response rate was slightly lower and was equal to 89.8% (95% PI = [82.6–97.1]).

The rates of undetectable HDV RNA were predicted to be 36.0% (95% PI = [26.3–44.7]) and 66.7% (95% PI = [56.5–78.3]) after 48 weeks with BLV monotherapy and BLV + Peg-IFN, respectively. After 144 weeks, the predicted rates were equal to 67.5% (95% PI = [57.9–75.0]), 91.3% (95% PI = [84.0–97.1]) and 78.3% (95% PI = [69.6–88.4]), with BLV monotherapy, BLV + Peg-IFN and the intermediate treatment strategy, respectively.

Similarly, the rates of combined response (defined as a virological and biochemical response) after 48 weeks were predicted to be 21.9% (95% PI = [14.9–28.9]) and 34.8% (95% PI = [23.2–46.4]) in patients treated with BLV and BLV + Peg-IFN, respectively. After 144 weeks, these rates increased to 29.8%

(95% PI = 21.9–38.6)], 37.7% (95% PI = [26.1–49.3]), and 36.2% (95% PI = [26.1–47.8]) for the monotherapy, the combination and the intermediate treatment strategy, respectively.

In the intention-to-treat scenario, where the risk of treatment discontinuation of both BLV and Peg-IFN is accounted for, these rates were slightly lower. With rates of treatment discontinuation of  $\lambda_{BLV} = 0.00075 \text{ day}^{-1}$  (95% CI = [0.000570–0.000998]) and  $\lambda_{PEG} = 0.0015 \text{ day}^{-1}$ , we expect approximately 77% and 60% of patients to be still receiving treatment at 48 weeks with BLV and Peg-IFN, respectively. Consequently, the rates of virological response are expected to decrease accordingly. The details of the virological responses using this scenario it can be found in Fig. 5B and in the [Supplementary material](#).

Of note, regardless of the simulation scenario all treatment strategies led to a similar rate of biochemical response after 48 weeks of treatment (defined as a value of ALT <40 IU/L), with

**Table 2. Parameters estimated and their uncertainty, expressed as RSE%.**

|                             |                                                           | Parameter estimate (RSE%)   | SD of the random effect (RSE%) |
|-----------------------------|-----------------------------------------------------------|-----------------------------|--------------------------------|
| <b>Disease parameters</b>   |                                                           |                             |                                |
| $\delta$                    | Loss rate of infected cells ( $\text{day}^{-1}$ )         | $3.04 \cdot 10^{-2}$ (11.2) | 0.718 (12.8)                   |
| $V_0$                       | Number of virions at baseline (log IU/ml)                 | 5.93 (1.90)                 | 1.39 (6.24)                    |
| $c_a$                       | ALT clearance ( $\text{day}^{-1}$ )                       | 1.56 (11.6)                 | 0.288 (29.3)                   |
| $A_0$                       | ALT value at baseline (IU/L)                              | 102 (8.11)                  | 0.725 (8.9)                    |
| $A_{\infty\text{-young}}$   | ALT value in absence of infection in young males (IU/L)   | 43.4 (7.17)                 | 0.542 (6.0)                    |
| $A_{\infty\text{-elderly}}$ | ALT value in absence of infection in elderly males (IU/L) | 58.2 (6.64)                 |                                |
| $A_{\infty\text{-Females}}$ | ALT value in absence of infection in young females (IU/L) | 33.1 (8.74)                 |                                |
| <b>Drug effects</b>         |                                                           |                             |                                |
| $\epsilon_B^{BLV}$          | Effect of BLV on blocking infection                       | 0.903 (15.7)                | 5.48 (43.1)                    |
| $\epsilon_P^{PEG}$          | Effect of Peg-IFN on blocking viral production            | 0.924 (5.75)                | 4.46 (23.2)                    |
| <b>Survival analysis</b>    |                                                           |                             |                                |
| $\lambda_{BLV}$             | Rate of BLV discontinuation ( $\text{day}^{-1}$ )         | 0.00075 (14.4)              |                                |
| $\lambda_{PEG}$             | Rate of Peg-IFN discontinuation ( $\text{day}^{-1}$ )     | 0.00152 (3.39)              |                                |
| <b>Residual error model</b> |                                                           |                             |                                |
| $a_{HDV\ RNA}$              | Additive residual error on HDV RNA ( $\log_{10}$ IU/ml)   | 0.807 (3.28)                |                                |
| $b_{ALT}$                   | Proportional residual error on ALT                        | 0.304 (2.79)                |                                |

ALT, alanine aminotransferase; BLV, bulevirtide; Peg-IFN, pegylated interferon; RSE%, relative standard error %.

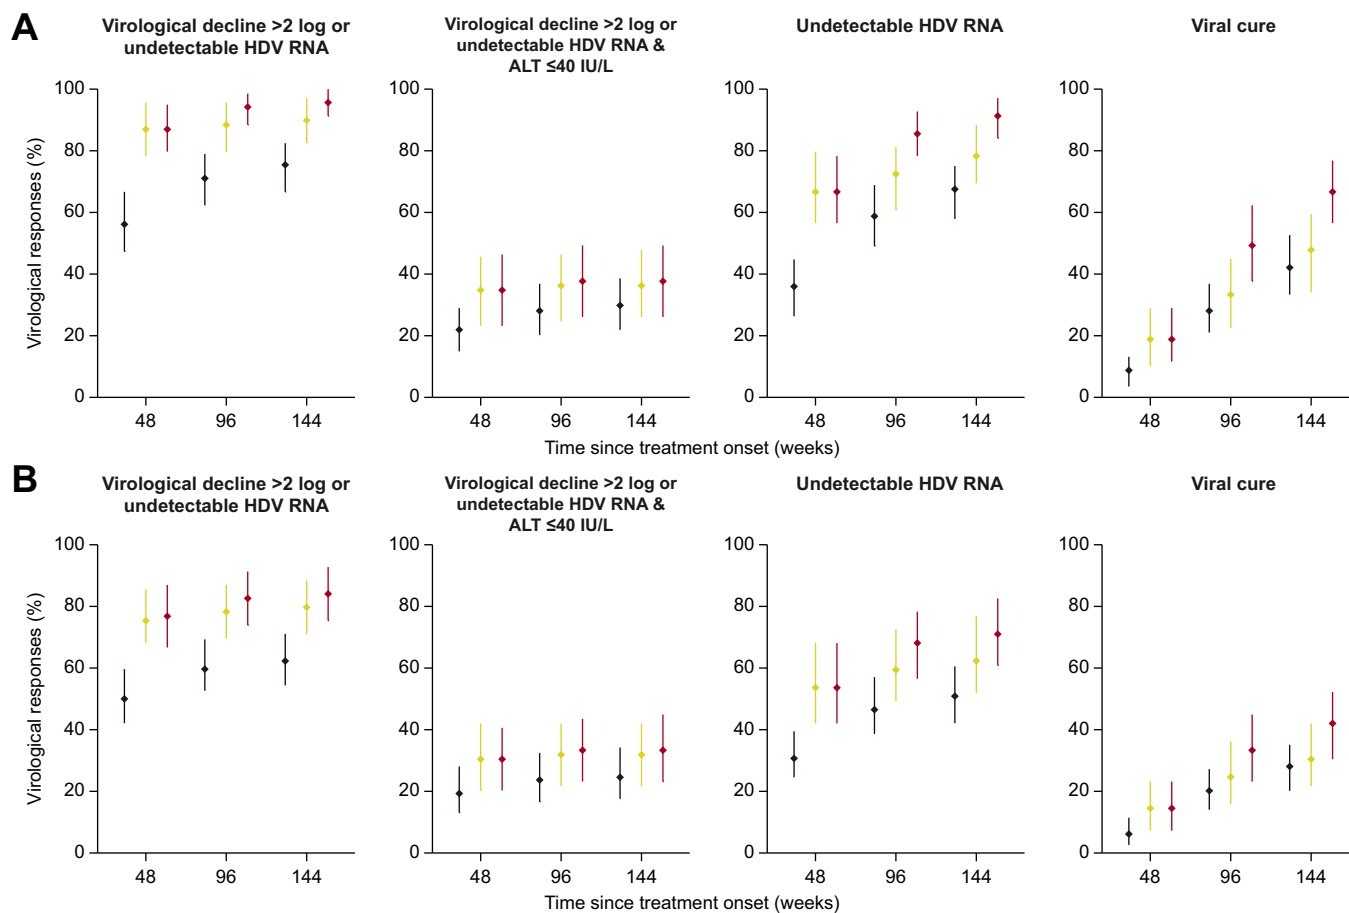

**Fig. 5. Viral and biochemical response rate predicted by the mathematical model in patients receiving BLV (black), BLV + Peg-IFN (red), and BLV + Peg-IFN for 48 weeks, followed by BLV alone (yellow), without taking into account treatment discontinuation (per-protocol analysis) (A) and when taken account treatment discontinuation (intention-to-treat analysis) (B).** The diamond and its associated line represent the median prediction of 500 simulated data sets and its 95% prediction interval. ALT, alanine transaminase; BLV, bulevirtide; Peg-IFN, pegylated interferon.

rates of 38.6% (95% PI = [29.8–46.5]) and 39.1% (95% PI = [27.5–50.7]) in patients treated with BLV or BLV + Peg-IFN for 48 weeks.

### Predicting the proportion of patients achieving HDV cure using the ‘cure boundary’ concept

Finally, we used the concept of cure boundary developed in HCV<sup>34</sup> to predict the rate of cure of HDV (see Materials and methods). The rate of viral cure after 48 weeks of treatment with BLV was equal to 8.8% (95% PI = [3.5–13.2]), compared with 18.8% (95% PI = [11.6–29.0]) after treatment with BLV + Peg-IFN. These rates would remain low after 96 weeks, with values of 28.1% (95% PI = [21.0–36.8]) and 49.3% (95% PI = [37.7–62.3]), with the monotherapy and the combination, respectively (Fig. 5A). The values obtained with the intermediate treatment strategy would be slightly lower to those obtained with BLV + Peg-IFN, with rates of 33.3% (95% PI = [22.4–44.9]) after 96 weeks of treatment. After 144 weeks of treatment, the predicted rates were equal to 42.1% (95% PI = [33.3–52.6]), 66.7% (95% PI = [56.5–76.8]), and 47.8% (95% PI = [34.0–59.4]), with BLV monotherapy, BLV + Peg-IFN and the intermediate treatment strategy, respectively.

The results of the intention-to-treat scenario are summarized in Fig. 5B and in the Supplementary material.

### Discussion

BLV has shown promising results in clinical trials, but little is known about its long-term antiviral activity and the potential benefit of its use in combination with Peg-IFN. The current study provides the first detailed analysis of viral kinetics in patients receiving BLV therapy, alone or in combination with Peg-IFN. Relying on the largest collection of ‘real world’ data so far, we identified a benefit of Peg-IFN on the virological response that could translate into an improved cure of HDV infection. BLV had a strong antiviral efficacy on blocking cell infection (90.3%), leading to a rate of virological response (defined as a decline of viral load from baseline >2 log or undetectable HDV RNA) of 56% (95% PI = [47–67]) after 48 weeks. Peg-IFN had a complementary mode of action and blocked viral production with an efficacy of 92.4%, leading to a rate of virological response in combination with BLV of 87% (95% PI = [80–95]).

To evaluate our predictions, we compared our results with the virological response after 96 weeks of therapy (N = 54). We found that 55% (CI = [39.3–71.8]) and 72.2% (CI = [51.5–92.9]) in monotherapy and in the combination group, respectively, achieved a virological response at 96 weeks. This is close to the values predicted by our model (59.6 and 82.6%, respectively, see Fig. 5B) and shows that our model provides reliable predictions



of the virological response. In theory, HDV infection, which is caused by an RNA virus without any integrated or episomal form, is curable. We therefore compared our predictions with the rates of sustained virological response (SVR) observed in the MYR204 study,<sup>19</sup> using SVR as a proxy for cure. Our model predicted that 25% of patients could achieve cure after 48 weeks of BLV + Peg-IFN followed by 48 weeks of BLV alone (Fig. 5B) which is close to the SVR rate of 32% (CI = [20–45]) reported in MYR204 (Table S4).

After 144 weeks of treatment, and when accounting for treatment discontinuation, the rates of virological response could reach 80% (PI = [71–88]) and 84% (PI = [75–93]) with the intermediate strategy (BLV + PEG for 1 year followed by BLV alone) and the combination, respectively. This shows that although the predicted rates of virological response is higher in patients treated with BLV + Peg-IFN than in those treated with BLV alone, the benefit of maintaining Peg-IFN could be lower in the long-term. However, a prolonged combined administration of BLV and Peg-IFN over 48 weeks of treatment may provide some additional benefits that were not accounted for by our model, such as the possibility to clear HBsAg.

From a modelling perspective, our model has some limitations. First, it neglects the dynamics of cell turnover and further assumes that all susceptible cells are infected with HBV at baseline. Second, we could not identify an effect of Peg-IFN on the clearance of infected cells, as found in some HBV studies.<sup>27</sup> Whether this is a genuine effect or simply reflects a lack of power to identify it, will need to be studied. Consequently, the dynamics of ALT was predicted to be similar between the two treatment groups as a reflection of our data (Figs. S10 and S11), whereas a slightly higher biochemical response was observed in the combination group in MYR204 study. Further, HBsAg data were missing in many individuals, and precluded its integration in the model.<sup>40</sup> Such data will be important to analyze in the future, and could help identify different populations of infected cells with a different half-life, as proposed by Shekhtman *et al.*<sup>33</sup> in a series of 18 patients treated with BLV monotherapy. Interestingly, the theoretical framework of this model supported the use of drugs blocking viral production, such as Peg-IFN, to potentiate BLV antiviral efficacy and accelerate viral kinetics. Although this prediction is corroborated by our results, our

model nonetheless emphasizes the large inter-patient variability in the response to both drugs and the risk of treatment dropout, both factors that may constitute an important hurdle to viral eradication in real life. With a substantial proportion of patients that may be non-responders despite prolonged therapy, it will be critical that future models identify baseline and on-treatment predictors of non-response.

Undoubtedly, the main limitation of these results is that it relies on two observational studies, and not on a randomized clinical trial. Although baseline characteristics were largely similar between the two treatment groups (except for platelet counts), a treatment bias is possible. The direction of this bias is difficult to anticipate, and could lead to overestimate the effect of Peg-IFN (if the combination was given to patients in better condition, as hinted by the higher level of platelet counts at baseline) or underestimate it (if treatment was given in priority to more severe patients). Also, the analysis of the synergism between BLV and Peg-IFN is hampered by the absence of a control group receiving Peg-IFN only. Consequently, our model cannot identify an effect of BLV on other viral kinetic parameters, making it possible that the effects of BLV could be underestimated. Another important limitation of our results is the use of the cure boundary<sup>34</sup> to predict the time needed to clear the last virus particle. This concept was successfully developed in HCV to guide treatment duration. However, the dynamics of HDV in the long term, and especially below the limit of quantification, could be more complex than HCV, and depend on unknown interaction with HBV proteins expressed from both cccDNA and integrated HBV DNA.

Finally, our results suggest that the addition of Peg-IFN may have some virological benefit. However, given the poor tolerance and the high variability in the response to Peg-IFN, the impact of a more rapid virological response on the liver functions and more generally on the clinical outcome will need to be evaluated. In that direction, larger prospective randomized studies will be needed to evaluate the predictive factors of response or non-response (Figs. S14 and S15).<sup>42</sup>

In summary, our analysis shows a clear effect of Peg-IFN in enhancing viral kinetics in patients treated with BLV. Randomized clinical trials are warranted to assess the virological and clinical benefit of the combination.

## Abbreviations

ALT, alanine transaminase; BLV, bulevirtide; CHB, chronic hepatitis B virus; CHD, chronic hepatitis Delta virus; CI, confidence interval; LLOQ, lower limit of quantification; LRT, likelihood-ratio test; NTCP, sodium/bile acid cotransporter; NUC, nucleos(t)ide analog; Peg-IFN, pegylated-interferon; PI, prediction interval; RSE, relative standard error; SAEM, stochastic approximation expectation–minimization; SVR, sustained virological response.

## Financial support

The ANRS HD EP01 BuleDelta cohort is funded and sponsored by the ANRS|MIE.

## Conflicts of interest

JG has received research funding and has consulted with Hoffman-LaRoche. SB, EG, and AG have received research funding from Eurobio Scientific. VdL received consulting fees from Gilead, AbbVie, BMS, GSK, Escopics, Alfasigma, Janssen, Orphalan, NovoNordisk, AstraZeneca. JMP has served as an advisor or speaker for Abbott, Abbvie, Gilead, and GSK. The other authors have no conflicts of interest to declare.

Please refer to the accompanying ICMJE disclosure forms for further details.

## Authors' contributions

Study design: SeM, JG, FZ, VdL. Provided the data: CFG, SB, AK, EG, AG, GL, MSL, FZ, VdL. Analyzed the data and wrote the manuscript: all authors.

## Data availability statement

The ANRS HD EP01 BULEDELTA cohort is a French nationwide cohort sponsored by the ANRS. Data are owned by ANRS and there are also legal restrictions to share data publicly. Nonetheless, data can be accessed upon demand to the scientific committee and the ANRS which can allow a contractual assess for collaboration purposes. Applicants will be asked to complete a Research Application Form specifying details for their planned study which will then be reviewed by the ANRS HD EP01 BULEDELTA Scientific committee. The ANRS HD EP01 BULEDELTA cohort is keen to promote collaboration among researchers and to see our unique coinfect HDV-HBV patient database and biobank used in studies which meet our ethics and consenting process.

## Supplementary data

Supplementary data to this article can be found online at <https://doi.org/10.1016/j.jhepr.2024.101070>.

## References

Author names in bold designate shared co-first authorship

- [1] Global progress report on HIV. viral Hepat Sex Transm infections 2021; <https://www.who.int/publications-detail-redirect/9789240027077>. [Accessed 28 February 2022].
- [2] Lok AS, Zoulim F, Dusheiko G, et al. Hepatitis B cure: from discovery to regulatory approval. *Hepatology* 2017;66:1296–1313.
- [3] Farci P. Delta hepatitis: an update. *J Hepatol* 2003;39:212–219.
- [4] Caviglia GP, Ciancio A, Rizzetto M. A review of HDV infection. *Viruses* 2022;14:1749.
- [5] Niro GA, Gioffreda D, Fontana R. Hepatitis delta virus infection: open issues. *Dig Liver Dis* 2011;43:S19–S24.
- [6] Sarin SK, Kumar M, Lau GK, et al. Asian-Pacific clinical practice guidelines on the management of hepatitis B: a 2015 update. *Hepatol Int* 2016;10:1–98.
- [7] European Association for the Study of the Liver. EASL 2017 Clinical Practice Guidelines on the management of hepatitis B virus infection. *J Hepatol* 2017;67:370–398.
- [8] **Wedemeyer H, Yurdaydin C, Hardtke S**, et al. Peginterferon alfa-2a plus tenofovir disoproxil fumarate for hepatitis D (HIDIT-II): a randomised, placebo controlled, phase 2 trial. *Lancet Infect Dis* 2019;19:275–286.
- [9] **Heller T, Rotman Y, Koh C**, et al. Long-term therapy of chronic delta hepatitis with peginterferon alfa. *Aliment Pharmacol Ther* 2014;40:93–104.
- [10] Sandmann L, Wedemeyer H. Interferon-based treatment of chronic hepatitis D. *Liver Int* 2023;43(Suppl 1):69–79.
- [11] Abbas Z, Memon MS, Mithani H, et al. Treatment of chronic hepatitis D patients with pegylated interferon: a real-world experience. *Antivir Ther* 2014;19:463–468.
- [12] **Wedemeyer H, Yurdaydin C, Dalekos GN**, et al. Peginterferon plus adefovir versus either drug alone for hepatitis delta. *New Engl J Med* 2011;364:322–331.
- [13] **Urban S, Neumann-Haefelin C, Lampertico P**. Hepatitis D virus in 2021: virology, immunology and new treatment approaches for a difficult-to-treat disease. *Gut* 2021;70:1782–1794.
- [14] Jachs M, Schwarz C, Panzer M, et al. Response-guided long-term treatment of chronic hepatitis D patients with bulevirtide—results of a “real world” study. *Aliment Pharmacol Ther* 2022;56:144–154.
- [15] **Durantal D, Zoulim F**. New antiviral targets for innovative treatment concepts for hepatitis B virus and hepatitis delta virus. *J Hepatol* 2016;64(Suppl 1):S117–S131.
- [16] Wedemeyer H, Aleman S, Brunetto MR, et al. A phase 3, randomized trial of bulevirtide in chronic hepatitis D. *New Engl J Med* 2023;389:22–32.
- [17] Ferenci P, Reiberger T, Jachs M. Treatment of chronic hepatitis D with bulevirtide—a fight against two foes—an update. *Cells* 2022;11:3531.
- [18] Soriano V, Moreno-Torres V, Treviño A, et al. Bulevirtide in the treatment of hepatitis delta: drug discovery, clinical development and place in therapy. *Drug Des Devel Ther* 2023;17:155–166.
- [19] Asselah T, Lampertico P, Wedemeyer H et al. Efficacy and safety of bulevirtide in combination with pegylated interferon alfa-2a in patients with chronic hepatitis delta: primary endpoint results from a phase 2b open-label, randomized, multicenter study MYR204. [https://www.natap.org/2023/AASLD/AASLD\\_60.htm](https://www.natap.org/2023/AASLD/AASLD_60.htm) Accessed December 1, 2023.
- [20] Wedemeyer H, Bogomolov P, Blank A et al. Final results of a multicenter, open-label phase 2b clinical trial to assess safety and efficacy of MyrcludexB in combination with Tenofovirin patients with HBV/HDV coinfection. [https://www.natap.org/2018/EASL/EASL\\_88.htm](https://www.natap.org/2018/EASL/EASL_88.htm) Accessed August 1, 2023.
- [21] Bogomolov P, Alexandrov A, Voronkova N, et al. Treatment of chronic hepatitis D with the entry inhibitor myrcludex B: first results of a phase Ib/Ia study. *J Hepatol* 2016;65:490–498.
- [22] Degasperis E, Anolli MP, Lampertico P. Bulevirtide-based treatment strategies for chronic hepatitis delta: a review. *J Viral Hepat* 2023;30(Suppl 1):26–32.
- [23] Snoeck E, Chanu P, Lavielle M, et al. A comprehensive hepatitis C viral kinetic model explaining cure. *Clin Pharmacol Ther* 2010;87:706–713.
- [24] Guedj J, Bazzoli C, Neumann AU, et al. Design evaluation and optimization for models of hepatitis C viral dynamics. *Stat Med* 2011;30:1045.
- [25] Nguyen T, Guedj J. HCV Kinetic models and their implications in drug development. *CPT Pharmacometrics Syst Pharmacol* 2015;4:231–242.
- [26] Ciupe SM. Modeling the dynamics of hepatitis B infection, immunity, and drug therapy. *Immunol Rev* 2018;285:38–54.
- [27] El Messaoudi S, Lemenuel-Diot A, Gonçalves A, et al. A semi-mechanistic model to characterize the long-term dynamics of hepatitis B virus markers during treatment with lamivudine and pegylated interferon. *Clin Pharmacol Ther* 2023;113:390–400.
- [28] Zakh R, Churkin A, Bietsch W, et al. A mathematical model for early HBV and -HDV kinetics during anti-HDV treatment. *Mathematics (Basel)* 2021;9:3323.
- [29] Gonçalves A, Lemenuel-Diot A, Cosson V, et al. What drives the dynamics of HBV RNA during treatment? *J Viral Hepat* 2021;28:383–392.
- [30] Ribeiro RM, Germanidis G, Powers KA, et al. Hepatitis B virus kinetics under antiviral therapy sheds light on differences in hepatitis B e antigen positive and negative infections. *J Infect Dis* 2010;202:1309–1318.
- [31] Dahari H, Cotler SJ, Layden TJ, et al. Hepatitis B virus clearance rate estimates. *Hepatology* 2009;49:1779–1780. author reply 1780–81.
- [32] Kadelka S, Dahari H, Ciupe SM. Understanding the antiviral effects of RNAi-based therapy in HBeAg-positive chronic hepatitis B infection. *Sci Rep* 2021;11:200.
- [33] Shekhtman L, Cotler SJ, Degasperis E, et al. Modelling HDV kinetics under entry-inhibitor Bulevirtide suggests the existence of two HDV-infected cell populations. *JHEP Rep* 2023;6:100966.
- [34] Perelson AS, Guedj J. Modelling hepatitis C therapy – predicting effects of treatment. *Nat Rev Gastroenterol Hepatol* 2015;12:437–445.
- [35] Goyal A, Lurie Y, Meissner EG, et al. Modeling HCV cure after an ultra-short duration of therapy with direct acting agents. *Antivir Res* 2017;144:281–285.
- [36] Dixit NM, Layden-Almer JE, Layden TJ, et al. Modelling how ribavirin improves interferon response rates in hepatitis C virus infection. *Nature* 2004;432:922–924.
- [37] Ribeiro RM, Layden-Almer J, Powers KA, et al. Dynamics of alanine aminotransferase during hepatitis C virus treatment. *Hepatology* 2003;38:509–517.
- [38] **Iannacone M, Guidotti LG**. Immunobiology and pathogenesis of hepatitis B virus infection. *Nat Rev Immunol* 2022;22:19–32.
- [39] **Neumann AU, Lam NP, Dahari H**, et al. Hepatitis C viral dynamics in vivo and the antiviral efficacy of interferon- $\alpha$  therapy. *Science* 1998;282:103–107.
- [40] Guedj J, Rotman Y, Cotler SJ, et al. Understanding early serum hepatitis D virus and hepatitis B surface antigen kinetics during pegylated interferon-alpha therapy via mathematical modeling. *Hepatology* 2014;60:1902–1910.
- [41] Guedj J, Dahari H, Shudo E, et al. Hepatitis C viral kinetics with the nucleoside polymerase inhibitor mericitabine (RG7128). *Hepatology* 2012;55:1030–1037.
- [42] Samiullah S, Bikharam D, Nasreen. Treatment of chronic hepatitis delta virus with peg-interferon and factors that predict sustained viral response. *World J Gastroenterol* 2012;18:5793–5798.

**Supplemental information**

**Effect of Peg-IFN on the viral kinetics of patients with HDV infection treated with bulevirtide**

**Selma El Messaoudi, Ségolène Brichler, Claire Fougerou-Leurent, Emmanuel Gordien, Athenaïs Gerber, Amal Kortebi, Garance Lagadic, Miroslava Subic-Levrero, Sophie Metivier, Stanislas Pol, Anne Minello, Vlad Ratziu, Vincent Leroy, Philippe Mathurin, Laurent Alric, Fatoumata Coulibaly, Jean-Michel Pawlotsky, Fabien Zoulim, Victor de Lédighen, Jérémie Guedj, and the ANRS HD EP01 BULEDELTA Study Group**

# Effect of Peg-IFN on the viral kinetics of HDV infected patients treated with bulevirtide

## Supplementary materials

Selma El Messaoudi, Ségolène Brichler, Claire Fougerou-Leurent, Emmanuel Gordien, Athenais Gerber, Amal Kortebi, Garance Lagadic, Miroslava Subic-Levrero, Sophie Metivier, Stanislas Pol, Anne Minello, Vlad Ratziu, Vincent Leroy, Philippe Mathurin, Laurent Alric, Fatoumata Coulibaly, Jean-Michel Pawlotsky, Fabien Zoulim, Victor de Lédighen, Jérémie Guedj and the ANRS HD EP01 BULEDELTA study group

|                                                                       |    |
|-----------------------------------------------------------------------|----|
| Table of contents                                                     |    |
| List of investigators.....                                            | 2  |
| Additional text.....                                                  | 3  |
| 1. Calibration curves.....                                            | 3  |
| 2. Model prediction : results of the intention-to-treat scenario..... | 4  |
| 2. Model code.....                                                    | 4  |
| Figures.....                                                          | 8  |
| 1. Observations and treatment assigned.....                           | 8  |
| 2. Doses of Peg-IFN.....                                              | 10 |
| 3. Treatment response.....                                            | 11 |
| 4. Calibration curves.....                                            | 15 |
| 5. Survival analysis : Probability of stopping treatment.....         | 17 |
| 6. Model evaluation.....                                              | 19 |
| Tables.....                                                           | 22 |
| 1. Limit of quantification.....                                       | 22 |
| 2. Estimation of treatment effect.....                                | 23 |
| 3. Sensitivity analysis taking into account the dose of Peg-IFN.....  | 24 |
| 4. Model prediction : comparison to MY204 study.....                  | 25 |

## 31 List of investigators

32  
 33 Sophie Metivier<sup>1</sup>, Victor de Ledinghen<sup>2</sup>, Stanislas Pol<sup>3</sup>, Anne Minello<sup>4</sup>, Vlad Ratziu<sup>5</sup>, Vincent Leroy<sup>6</sup>,  
 34 Philippe Mathurin<sup>7</sup>, Laurent Alric<sup>8</sup>, Nathalie Ganne<sup>9</sup>, Fabien Zoulim<sup>10</sup>, Véronique Loustaud-Ratti<sup>11</sup>,  
 35 Dominique Roulot<sup>9</sup>, Karine Lacombe<sup>12</sup>, Caroline Lascoux-Combe<sup>12</sup>, Georges-Philippe Pageaux<sup>13</sup>,  
 36 Isabelle Rosa<sup>14</sup>, Caroline Jezequel<sup>15</sup>, Jérôme Dumortier<sup>16</sup>, Ghassan Riachi<sup>17</sup>, Olivier  
 37 Chazaouilleres<sup>12</sup>, Dulce Alfaiate<sup>18</sup>, Dider Samuel<sup>19</sup>, Xavier Causse<sup>20</sup>, Armando Abergel<sup>21</sup>, Julie  
 38 Chas<sup>22</sup>, Anne Gervais<sup>23</sup>, Marc Bourlière<sup>24</sup>, Louis d'Alteroche<sup>25</sup>

- 39  
 40  
 41 1. Department of Hepatology, CHU Rangueil, Toulouse, France  
 42 2. Centre d'Investigation de la Fibrose Hépatique, Bordeaux University Hospital, Pessac,  
 43 France; INSERM U1312, Bordeaux University, Bordeaux, France.  
 44 3. Department of Hepatology, Hôpital Cochin, AP-HP, Université Paris-René Descartes,  
 45 INSERM U1016, Paris, France.  
 46 4. Department of Hepatology and Gastroenterology, University hospital Dijon, INSERM UMR  
 47 1231, France.  
 48 5. Sorbonne Université, Assistance Publique-Hôpitaux de Paris, Hôpital Pitié Salpêtrière-,  
 49 Institute of Cardiometabolism and Nutrition (ICAN), Paris, France.  
 50 6. Department of Hepatology and Gastroenterology, Centre Hospitalo-Universitaire, INSERM  
 51 U1209, Université Grenoble Alpes, Grenoble, France.  
 52 7. Service des maladies de l'appareil digestif, Université Lille 2 and Inserm U795, France.  
 53 8. Department of Internal Medicine and Digestive Diseases, UMR-152, Toulouse III University,  
 54 France.  
 55 9. Department of Hepatology, Hôpital Avicenne AP-HP, Bobigny, France  
 56 10. Department of Hepatology, Hospices Civils de Lyon, France.  
 57 11. Department of Hepatology ; Dupuytren Hospital, Limoges, France  
 58 12. Department of Infectious and Tropical Diseases, Saint-Antoine Hospital- APHP, Paris,  
 59 France  
 60 13. Department of Hepatology, Saint Eloi Hospital, Montpellier, France .  
 61 14. Department of Hepatology, CHIC, Créteil, France.  
 62 15. Department of Hepatology, Pontchaillou Hospital, Rennes, France.  
 63 16. Department of Hepatology, Edouard Herriot Hospital, Lyon, France.  
 64 17. Department of Hepatology, Charles Nicolle Hospital, Rouen, France  
 65 18. Department of Infectious and Tropical Diseases, Hospices Civils de Lyon, France.  
 66 19. Department of Hepatology, Paul Brousse Hospital- APHP, Villejuif, France

- 67 20. Department of Hepatology, La Source Hospital, Orléans, France  
68 21. Department of Hepatology, Estaing Hospital, Clermont-Ferrand, France  
69 22. Department of Infectious and Tropical Diseases, Tenon Hospital- APHP, Paris, France  
70 23. Department of Infectious and Tropical Diseases, Bichat Hospital- APHP, Paris, France  
71 24. Department of Hepatology, Saint Joseph Hospital- APHP, Paris, France  
72 25. Department of Hepatology, Trousseau Hospital- APHP, Paris, France

73  
74  
75  
76

77 Additional text

78

### 79 *1. Calibration curves*

80

81 We identified heterogeneity in the units informed in the data, with some observations informed in  
82 cp/mL, and others in IU/mL. We developed calibration curves to homogenize the concentrations.

### 83 *Methods*

84 The French National Reference Center for HDV organizes each year a program for external quality  
85 assessment of HDV RNA quantification. Therefore, the same samples are measured using both  
86 home-made techniques (in cp/mL), and the reference technique (in IU/mL). (**Figure S9**). Those data  
87 were used to derive linear regression curves.

88

89 For each center, linear regression (relationship between the concentration measured with the  
90 reference technique and in each center (home-made technique) to predict the concentration in  
91 IU/mL.

$$92 C_{Avicenne} = aC_{centre}^i + b$$

93 with  $C_{Avicenne}$  the concentration measured in Avicenne,  $C_{centre}^i$  : concentration measured in center  $i$ ,  
94  $a$  the slope,  $b$  the intercept

95 The linear regression curves are represented in **Figure S10**.

96

### 97 *2. Survival analysis*

98 The probability of treatment discontinuation (**Figure S11**) was estimated for each treatment  
99 independently with an exponential model as follow :

100

$$S(t) = \exp(-\lambda t)$$

101 The event was defined as a definitive cessation of treatment.

102

## 103 *2. Model prediction : results of the intention-to-treat scenario*

104

105 In the intention-to-treat scenario, where the risk of treatment discontinuation of both BLV and Peg-  
106 IFN is accounted for, these rates were slightly lower. After 48 weeks, we predicted a virological  
107 response of 48.2% (PI 95% = [41.2 ; 56.2]) and 78.3% (PI 95% = [66.7 ; 88.4]) in patients treated  
108 with BLV and BLV+Peg-IFN, respectively (**Figure 4B**).

109 After 144 weeks of treatment, these values were equal to 60.5% (95% PI = [54.4 ; 70.2]) and 85.5%  
110 (95% PI = [76.8 ; 92.8]), respectively, and 79.7% (95% PI = [71.0 ; 88.4]) for the  
111 intermediate treatment strategy.

112 The rates of combined response after 48 weeks were predicted to be 19.3% (PI 95% = [14.0 ; 27.42])  
113 and 30.4% (PI 95% = [20.3 ; 42.0]), with BLV monotherapy and BLV+Peg-IFN, respectively and  
114 increased to 24.6% (PI 95% = [17.5 ; 33.3]), 34.8% (PI 95% = [24.6 ; 44.9]) and 31.9% (PI 95% =  
115 [21.7 ; 43.5]) with BLV monotherapy, BLV+Peg-IFN, and the intermediate treatment strategy,  
116 respectively.

117 Regarding the rates of undetectability, after 48 weeks we predicted rates of 30.7% (PI 95% = [22.8  
118 ; 37.7]) and 55.8% (PI 95% = [43.5 ; 69.6]) with BLV monotherapy or BLV + Peg-IFN, respectively  
119 and after 144 weeks of treatment, those rates increased to 50% (PI 95% = [41.3 ; 58.7]), 73.9% (PI  
120 95% = [63.8 ; 85.5]) and 62.3% (PI 95% = [52.2 ; 76.8]) with BLV monotherapy, BLV+Peg-IFN and  
121 the intermediate treatment strategy, respectively.

122 The rate of viral cure would drop to 7.0% (95% PI = 2.6 ; 12.3]) and 15.9% (95% PI = [7.2 ; 24.6]) in  
123 patients treated with BLV and BLV+Peg-IFN, respectively, after 48 weeks. After 96 weeks, these  
124 rates were equal to 19.7% (95% PI = 14.0 ; 36.3]), 36.2% (95% PI = [24.6 ; 47.9]) and 23.2 (95% PI  
125 = [14.5 ; 34.8]) , for the monotherapy, the combination therapy and the intermediate treatment  
126 strategy, respectively.

127 The rate of viral cure would drop to 7.0% (95% PI = 2.6 ; 12.3]) and 15.9% (95% PI = [7.2 ; 24.6]) in  
128 patients treated with BLV and BLV+Peg-IFN, respectively, after 48 weeks. After 96 weeks, these  
129 rates were equal to 19.7% (95% PI = 14.0 ; 36.3]), 36.2% (95% PI = [24.6 ; 47.9]) and 23.2 (95% PI  
130 = [14.5 ; 34.8]) , for the monotherapy, the combination therapy and the intermediate treatment  
131 strategy, respectively.

132

133

## 134 *2. Model code*

135 DESCRIPTION: Neumann-Lam model (Neumann et al., Science, 282, 1998)

136

137 [LONGITUDINAL]

```

138 input = {beta_log, delta, p, c, eps_beta_BLV, eps_p_PEG, An, A0, ca, V0_log, tlag, lambda_BLV,
139 lambda_PEG, Start_PEG, End_PEG_1, Restart_PEG_1, End_PEG_2, Restart_PEG_2,
140 End_PEG_3, First_stop_BLV, Restart_BLV_1, End_BLV_2, Restart_BLV_2}
141 Start_PEG={use=regressor}
142 End_PEG_1={use=regressor}
143 Restart_PEG_1={use=regressor}
144 End_PEG_2={use=regressor}
145 Restart_PEG_2={use=regressor}
146 End_PEG_3={use=regressor}
147 First_stop_BLV={use=regressor}
148 Restart_BLV_1={use=regressor}
149 End_BLV_2={use=regressor}
150 Restart_BLV_2={use=regressor}
151
152 EQUATION:
153 ; Initial conditions
154 t0 = 0
155 beta=10^beta_log
156 V0= 10^V0_log
157 T0= (c*delta)/(beta*p)
158 IC_0 = (beta*V0*T0)/delta
159 VL_0 = V0
160
161
162 ; Before IFN both eta and epsilon equal 0. Once therapy is initiated, both are >0
163 ; inhibition before and after the end of treatment
164
165 ; Dates PEG
166
167 if t <0
168 BLV =0
169 end
170
171 if t >= First_stop_BLV & t < Restart_BLV_1
172 BLV =0
173 end
174

```



```
175  if t >= End_BLV_2 & t < Restart_BLV_2
176  BLV =0
177  end
178  if t >=0 & t < First_stop_BLV
179  BLV=1
180  end
181
182  if t >=Restart_BLV_1 & t < End_BLV_2
183  BLV=1
184  end
185
186  if t >=Restart_BLV_2
187  BLV=1
188  end
189
190  ; Dates PEG
191  if t < Start_PEG + tlag
192  PEG =0
193  end
194
195  if t >= End_PEG_1 & t < Restart_PEG_1
196  PEG =0
197  end
198
199  if t >= End_PEG_2 & t < Restart_BLV_2
200  PEG =0
201  end
202
203  if t >= End_PEG_3
204  PEG =0
205  end
206
207  if t >=Start_PEG + tlag & t < End_PEG_1
208  PEG =1
209  end
210
211  if t >=Restart_PEG_1 + tlag & t < End_PEG_2
```

```

212 PEG=1
213 end
214
215 if t >=Restart_PEG_2 + tlag & t < End_PEG_3
216 PEG=1
217 end
218
219 if BLV==0 & PEG==0
220 eps_beta = 0
221 eps_p = 0
222
223 elseif BLV==1 & PEG==0
224 eps_beta = eps_beta_BLV
225 eps_p = 0
226 elseif BLV==0 & PEG==1
227 eps_beta = 0
228 eps_p= eps_p_PEG
229 else
230 eps_beta =eps_beta_BLV
231 eps_p= eps_p_PEG
232 end
233
234 ALT = An*(1 - (A0-An)/(An*(ca-delta))*(delta*exp(-ca*t)-exp(-delta*t)))
235
236 ; Viral dynamic model
237 ddt_IC = beta*(1-eps_beta)*T0*VL - delta*IC
238 ddt_VL = p*(1-eps_p)*IC - c*VL
239
240 LVL = log10(max(VL,-3)) ; to have LVL positive
241
242 ; Survival model
243 haz_BLV = lambda_BLV
244 haz_PEG = lambda_PEG
245
246 DEFINITION:
247 Event_BLV= {type=event, maxEventNumber=1, hazard=haz_BLV}
248 Event_PEG= {type=event, maxEventNumber=1, hazard=haz_PEG}

```

249

250 OUTPUT:

251 output = {LVL, ALT, Event\_BLV, Event\_PEG}

252

253 Figures

254 1. Observations and treatment assigned

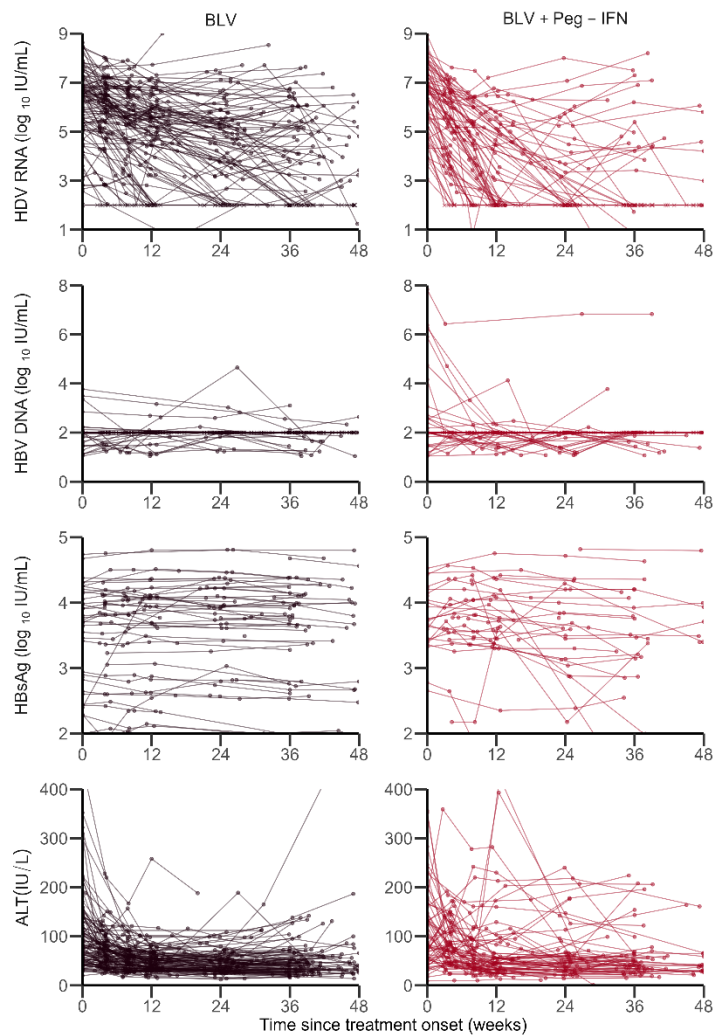

**Figure S1:** Dynamics of HDV RNA, HBV DNA, HBsAg and ALT during treatment in the group treated with bulevirtide alone (BLV) or in combination with Peg-IFN (BLV+Peg-IFN).

270

271

272

273

274

275

276

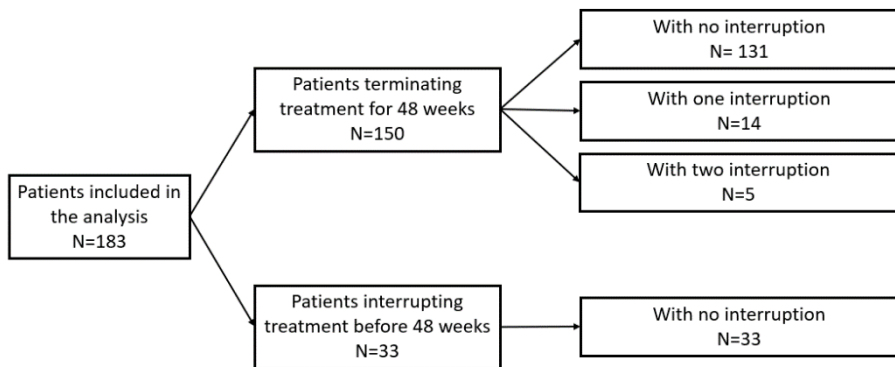

277 **Figure S2:** Workflow of the number of patients interrupting treatment during the analysis.

278

279

280

281

282

283

284

285

286

287

288

289

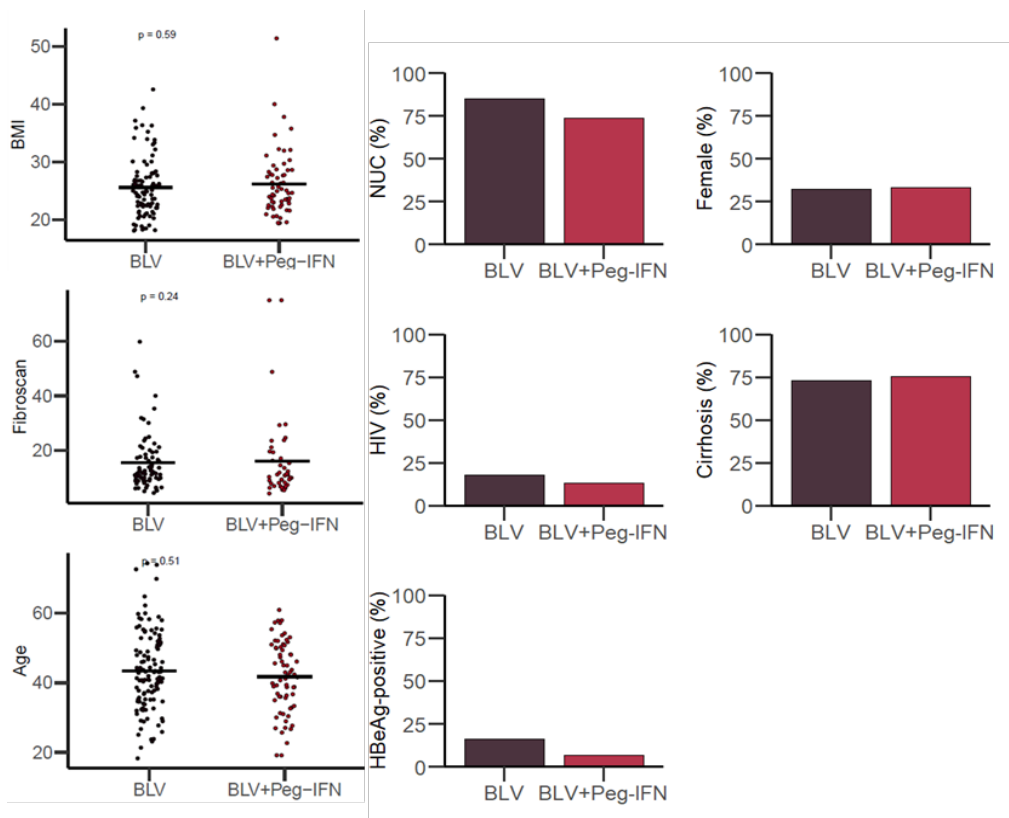

290 **Figure S3:** Patients characteristics versus treatment received at baseline. Black represents the group treated  
291 with monotherapy and red represents the group treated with the combination.

292

293

294 2. Doses of Peg-IFN

295 The dose of Peg-IFN was available in 46 patients. Among them, the dose was adjusted  
296 throughout the analysis in 10 patients (8 for whom the dose was reduced, and 2 for whom  
297 the dose was increased.) For 3 patients, the dose was reduced twice.

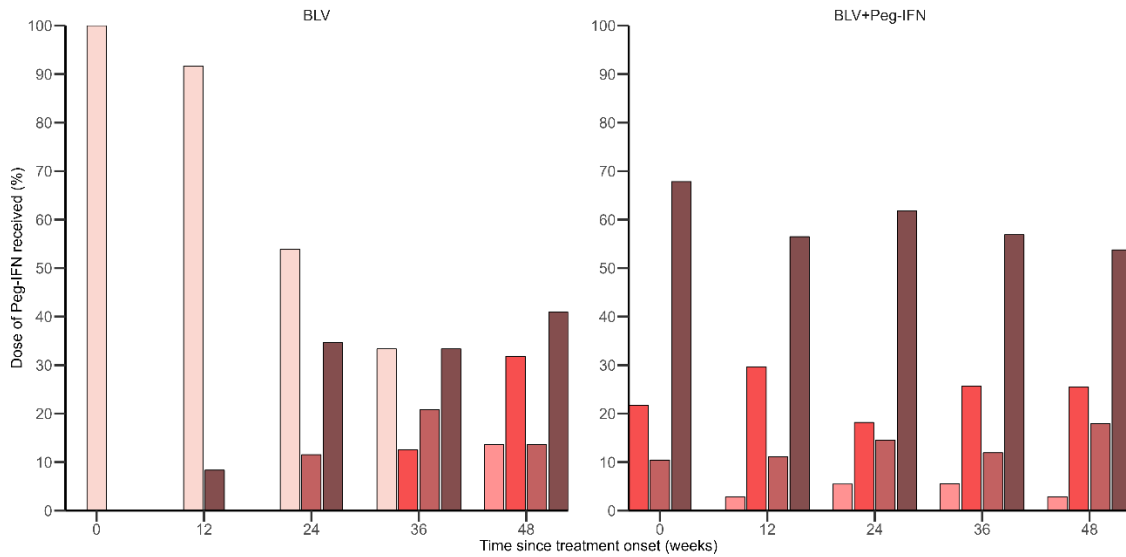

298 **Figure S4:** Percentage of doses of Peg-IFN available during the analysis. Each level of the gradient of reds  
299 correspond to a dose (0, 45, 90, 180), the higher the dose, the darker the red.  
300  
301  
302  
303  
304  
305  
306  
307  
308  
309  
310  
311

312 3. Treatment response

313

314

315

316

317

318

319

320

321

322

323

324

325

326

327

328

329

330

331

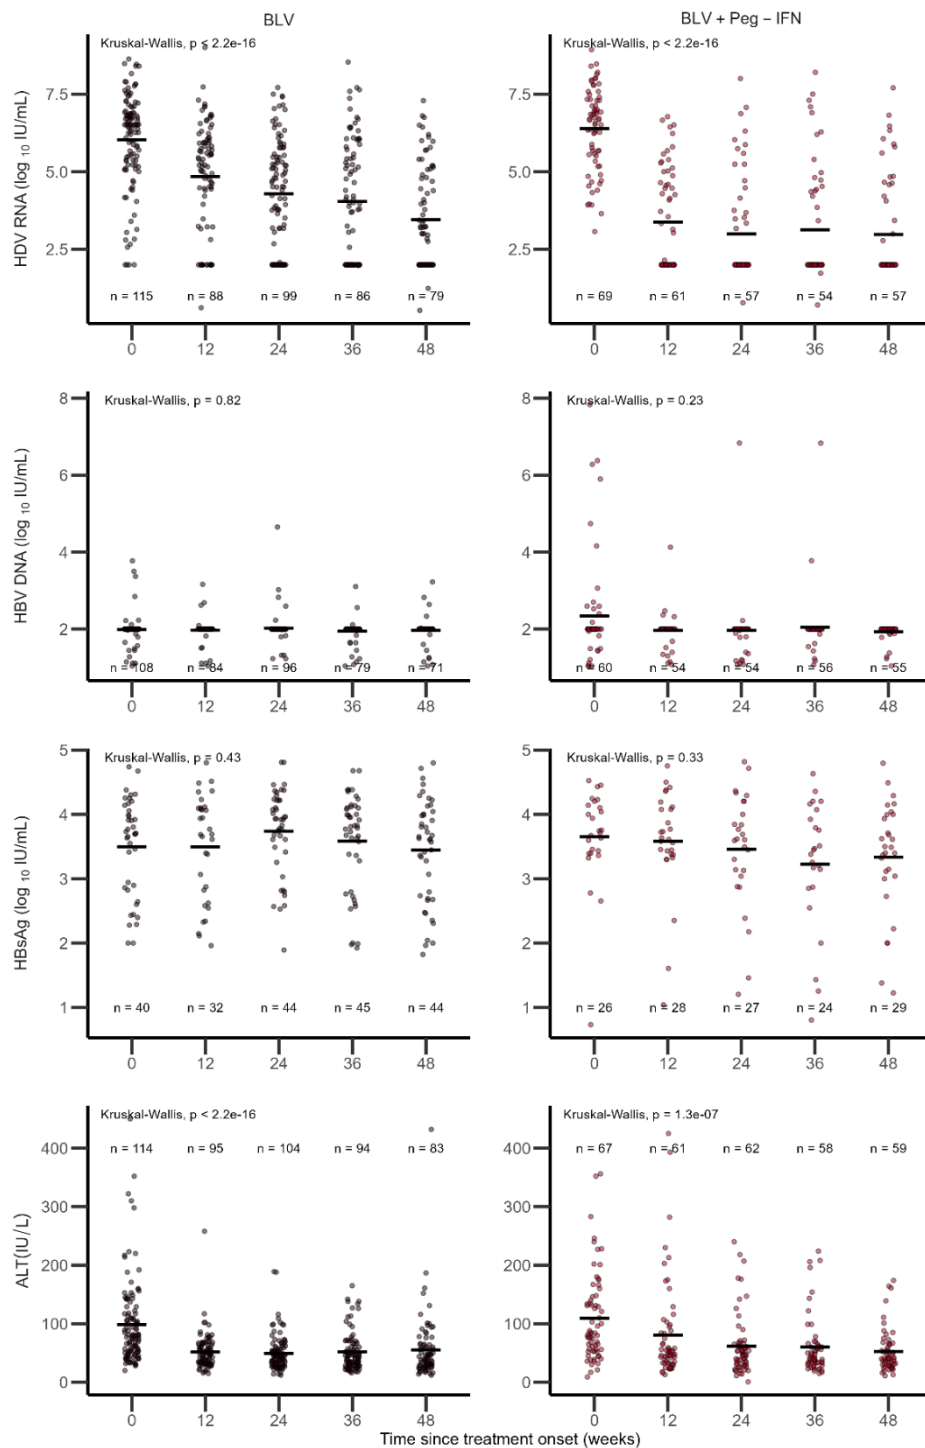

332 **Figure S5:** Virologic and biochemical decline kinetics in each group. The plain line represents the  
333 median, n represent the number of observations

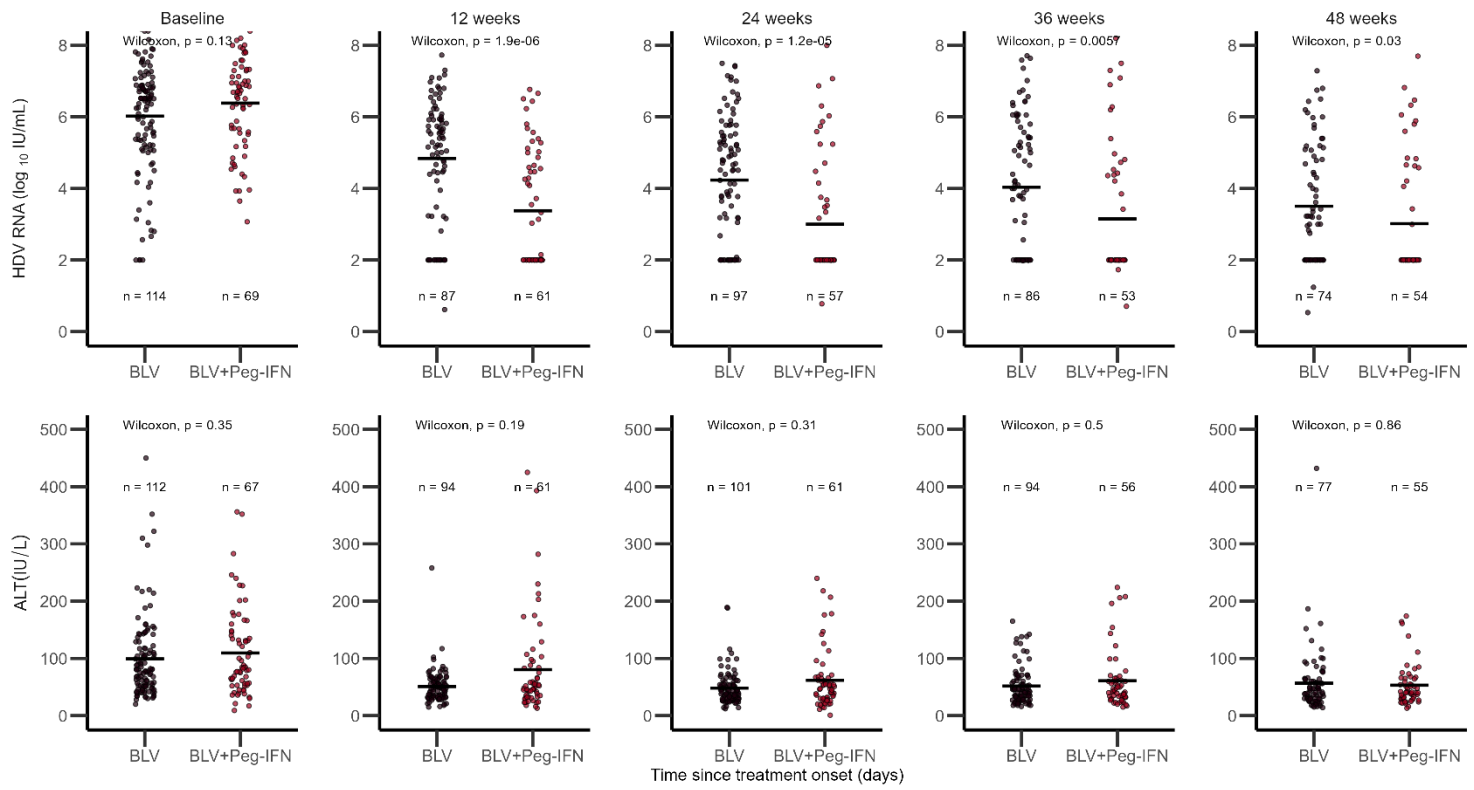

334 **Figure S6:** Distribution of the observed HDV RNA and ALT levels across the study in groups Bulevirtide (BLV)  
 335 and bulevirite+Peg-IFN (BLV+Peg-IFN). The plain line represents the median concentration, n represent the  
 336 number of observations.  
 337

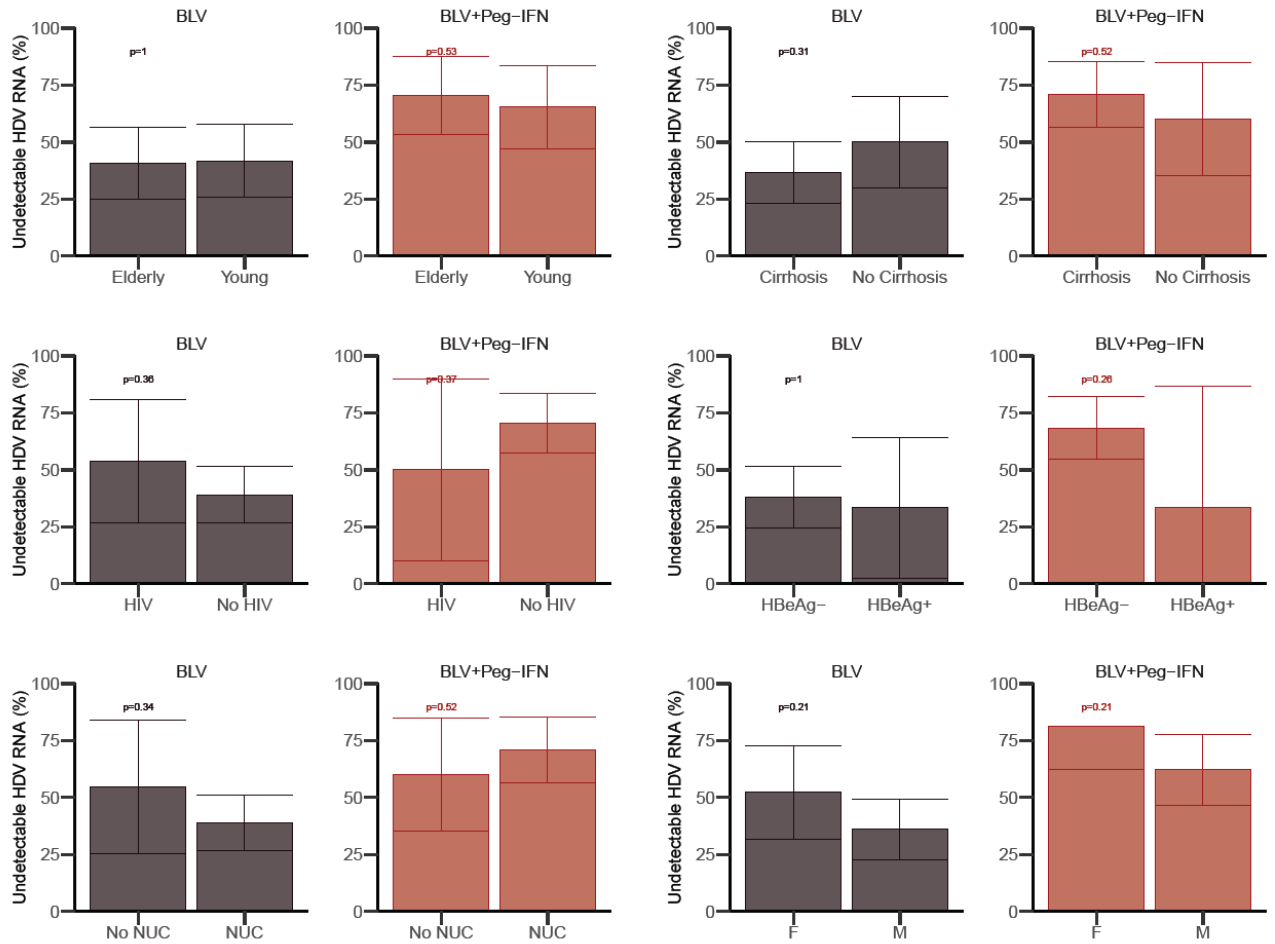

338  
 339  
 340 **Figure S7** : Percentage of undetectable HDV RNA in each group according to baseline covariates. The  
 341 errorbars correspond to the 95% confidence interval of a binomial law.

342  
 343  
 344  
 345  
 346  
 347  
 348  
 349  
 350



351  
352  
353  
354  
355  
356  
357  
358  
359  
360  
361  
362  
363  
364  
365  
366  
367  
368  
369  
370  
371  
372  
373  
374  
375  
376  
377  
378

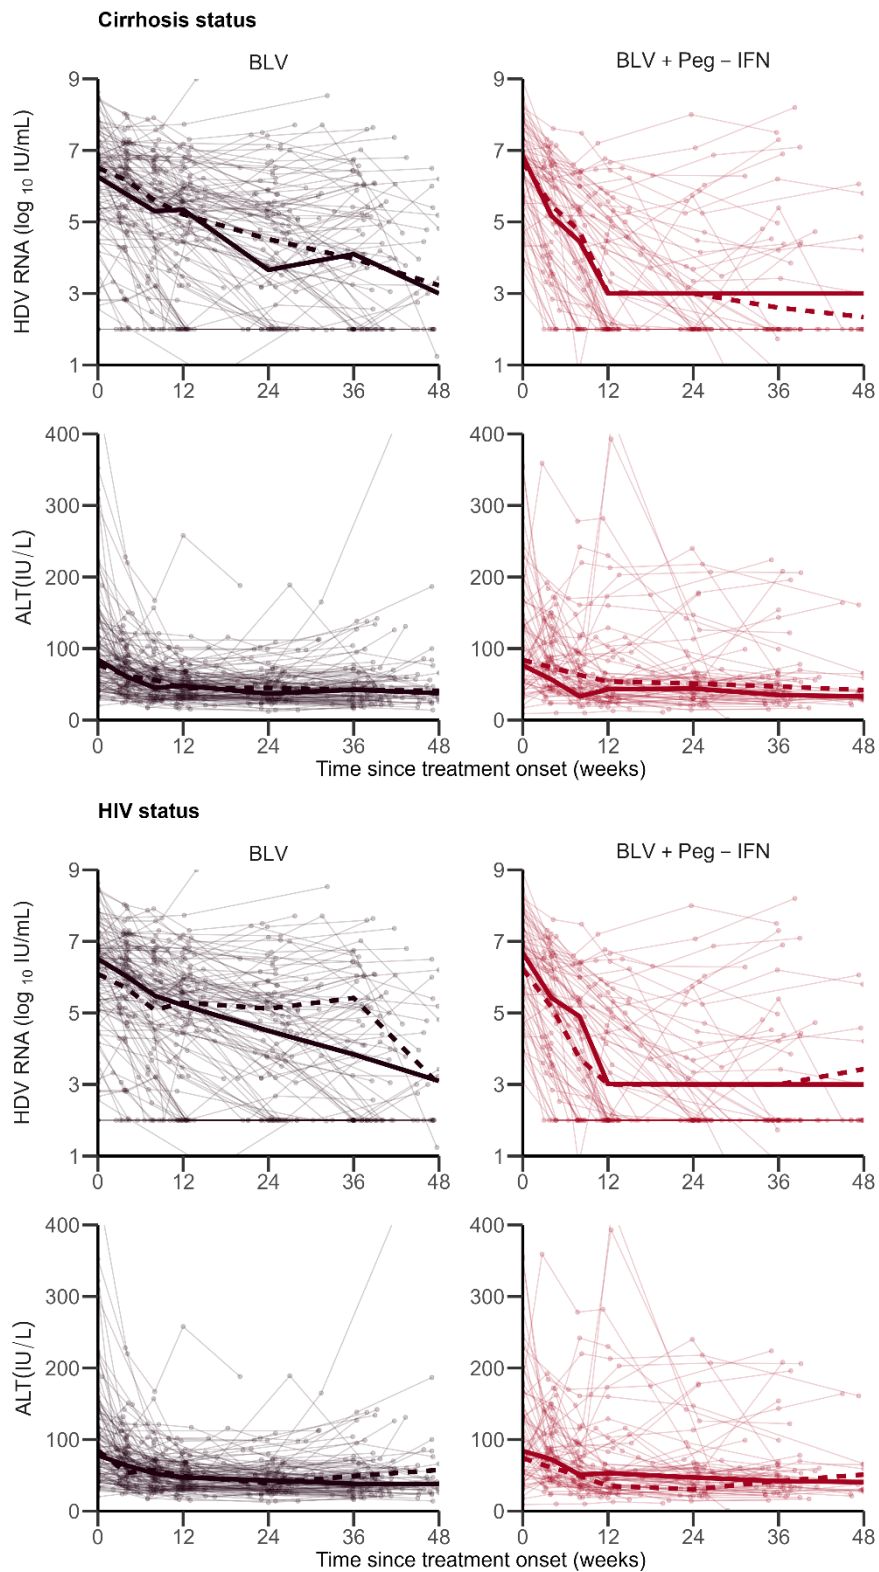

**Figure S8** : HDV RNA and ALT kinetics observed in each group. The large line correspond to the median observed in top : cirrhotic patients (plain line) versus non-cirrhotic patients (dashed line) ; bottom : HIV patients (plain line) versus non-HIV patients (dashed line).

379 4. Calibration curves

380  
381

382  
383  
384  
385  
386

387  
388  
389  
390  
391

392  
393  
394  
395  
396

397  
398

399

400 **Figure S9:** Measurements of the samples used to derive the linear regression, with their value with “home-  
401 made” techniques and the reference technique.  
402

403

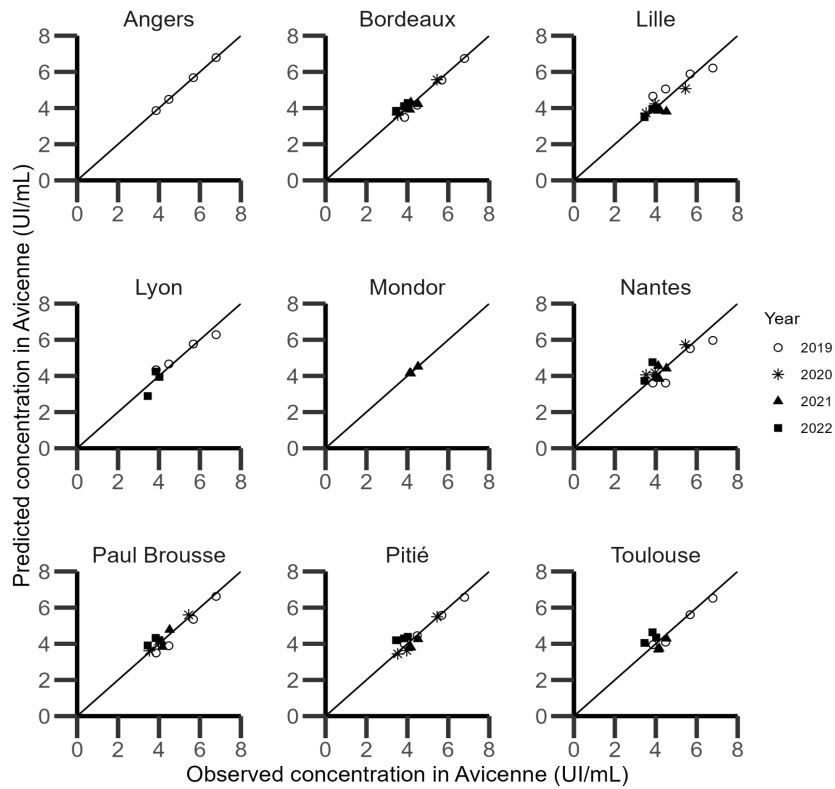

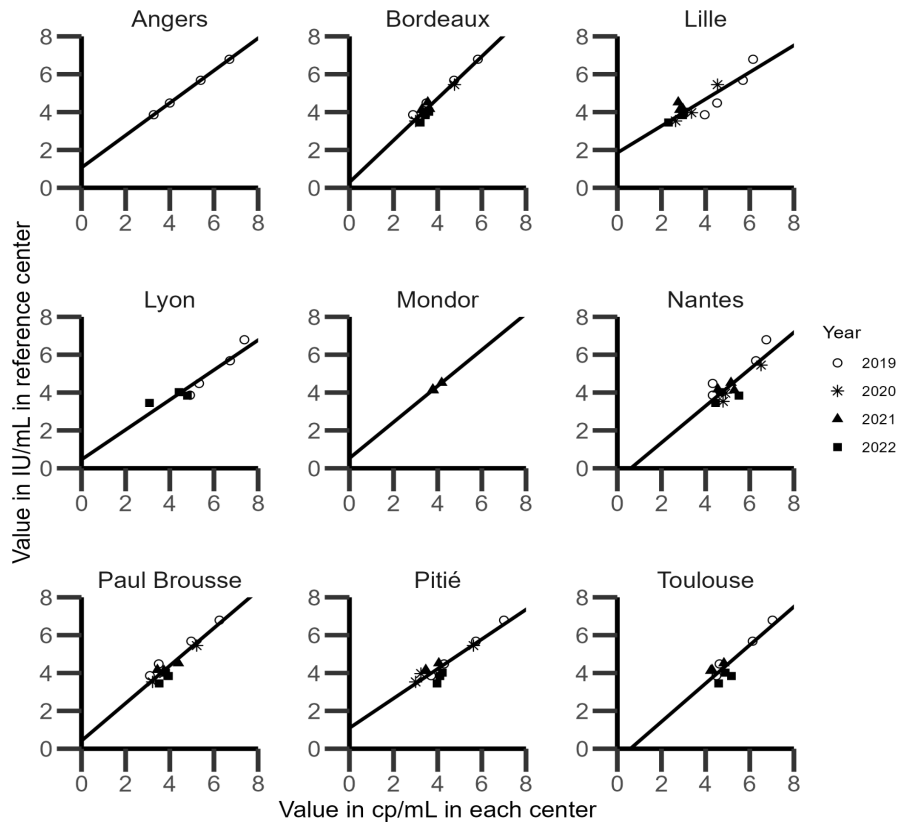

423 **Figure S10:** Linear regression curves allowing to derive concentrations from the reference technique.

424

425

426

427

428

429

430 5. Survival analysis : Probability of stopping treatment

431

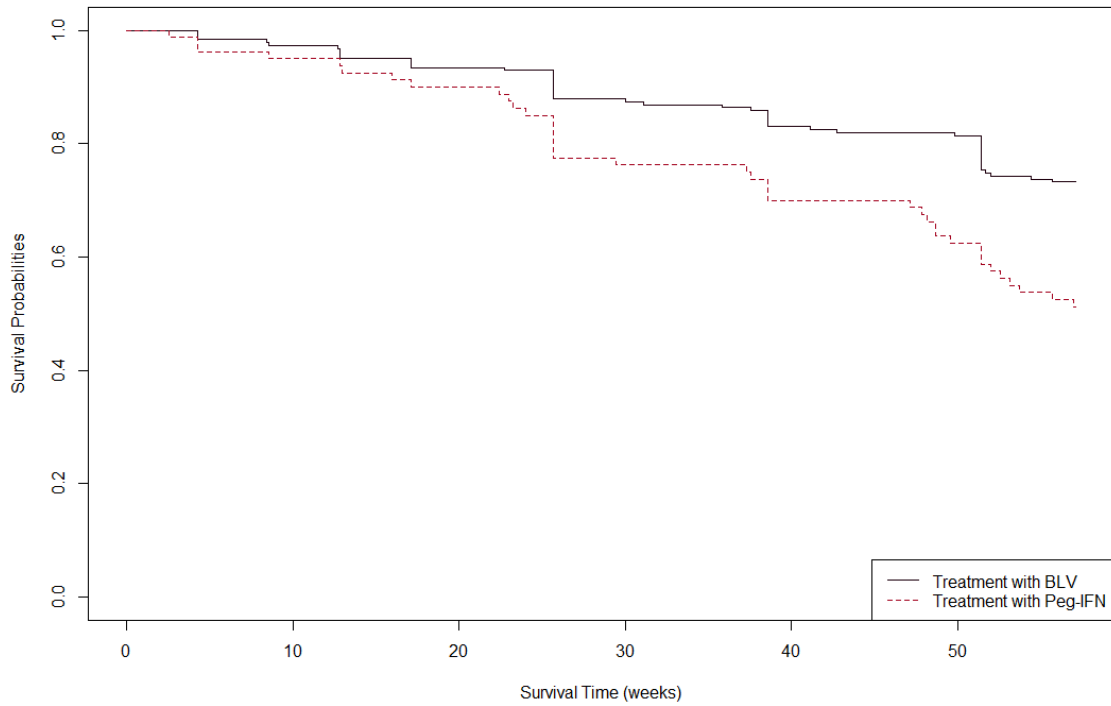

432 **Figure S11:** Kaplan-Meier curves on the survival probability of treatment cessation.

433

434

435

436

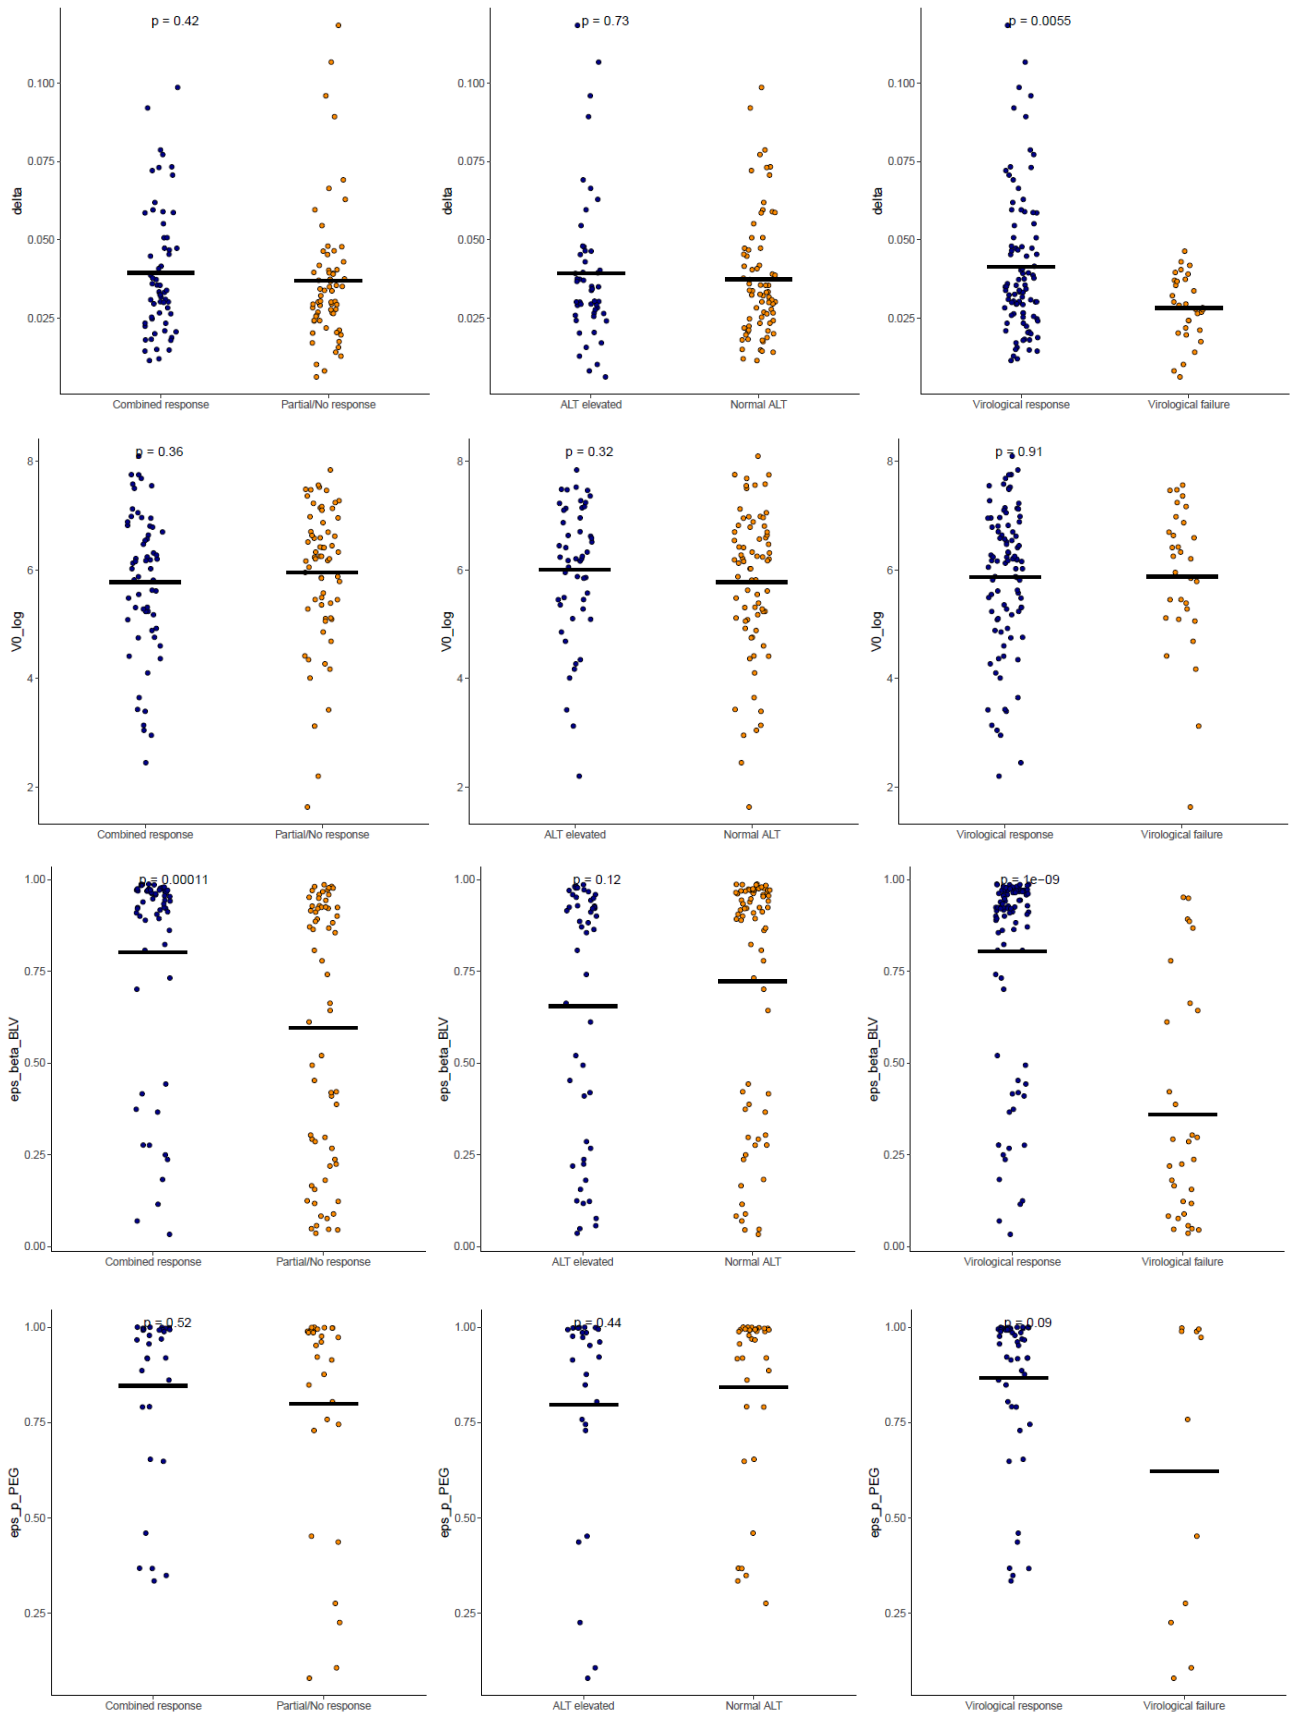

437  
 438 **Figure S12** : Distribution of parameters according to the virological, biochemical or combined response of  
 439 the patients.

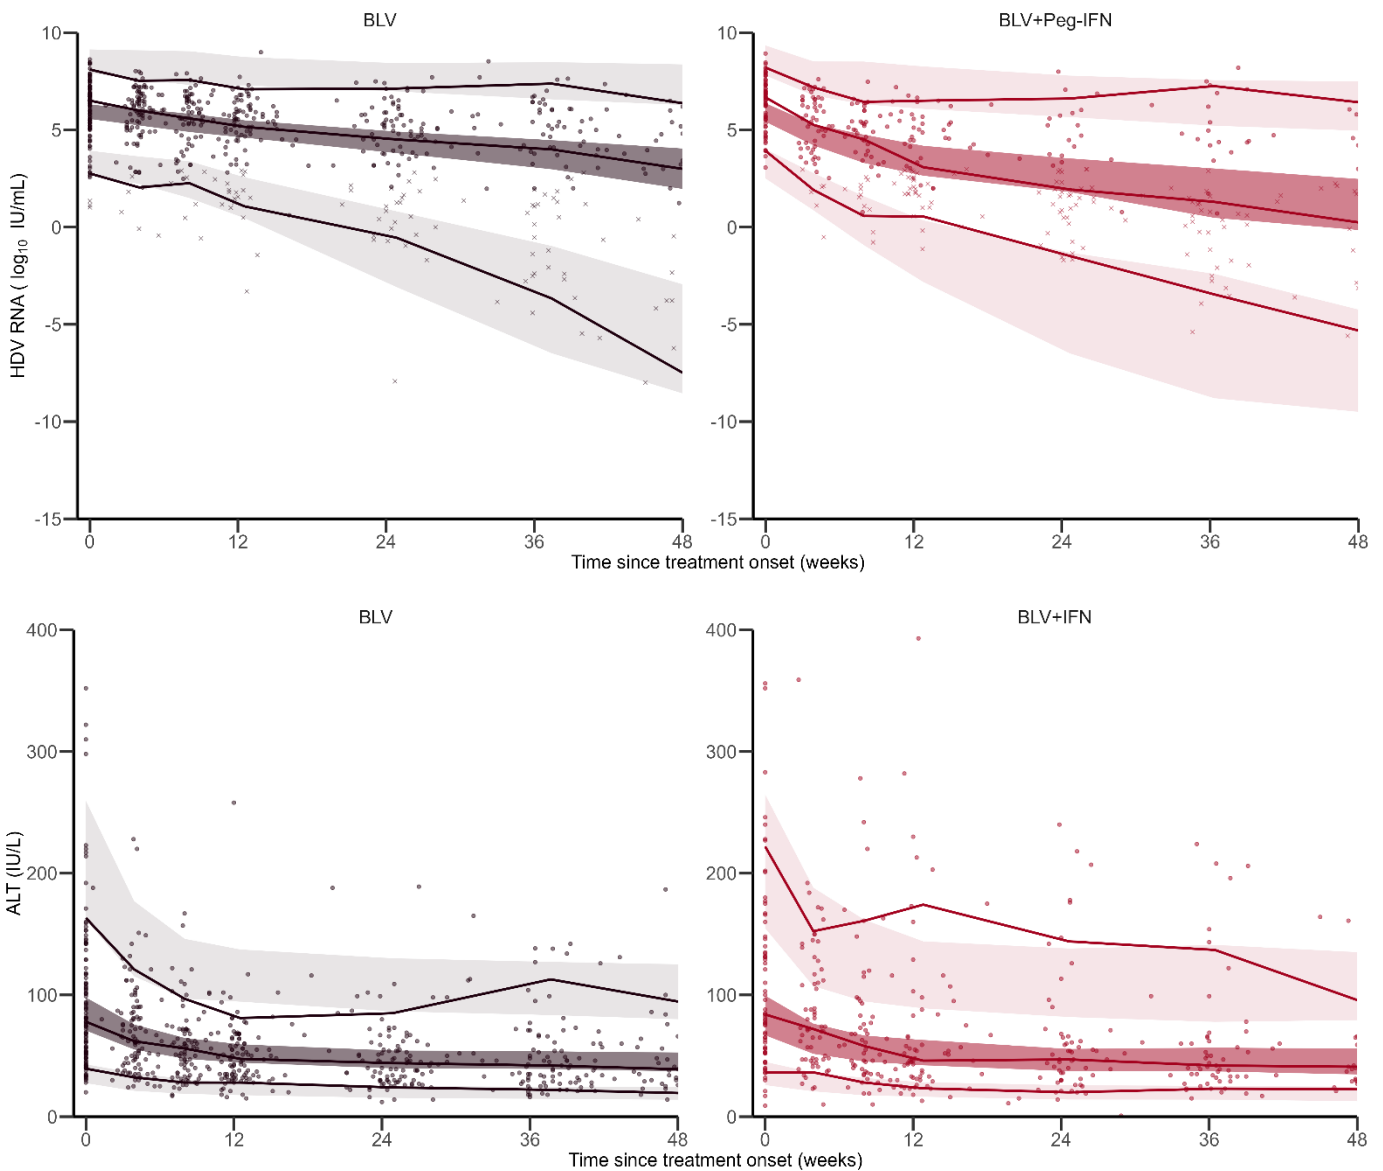

441 The model was evaluated using visual predictive checks (VPCs) and individual fits (Figure S2).

442 **Figure S13:** Visual predictive checks (VPCs) stratified on arms Bulevirtide monotherapy (BLV) or  
 443 in combination with Peg-IFN. Dots represent observed values, plain lines represent the 5th, 50th  
 444 and 95th empirical percentiles on observed data. Shaded areas represent the 95% prediction  
 445 interval around the corresponding percentiles.

446

447

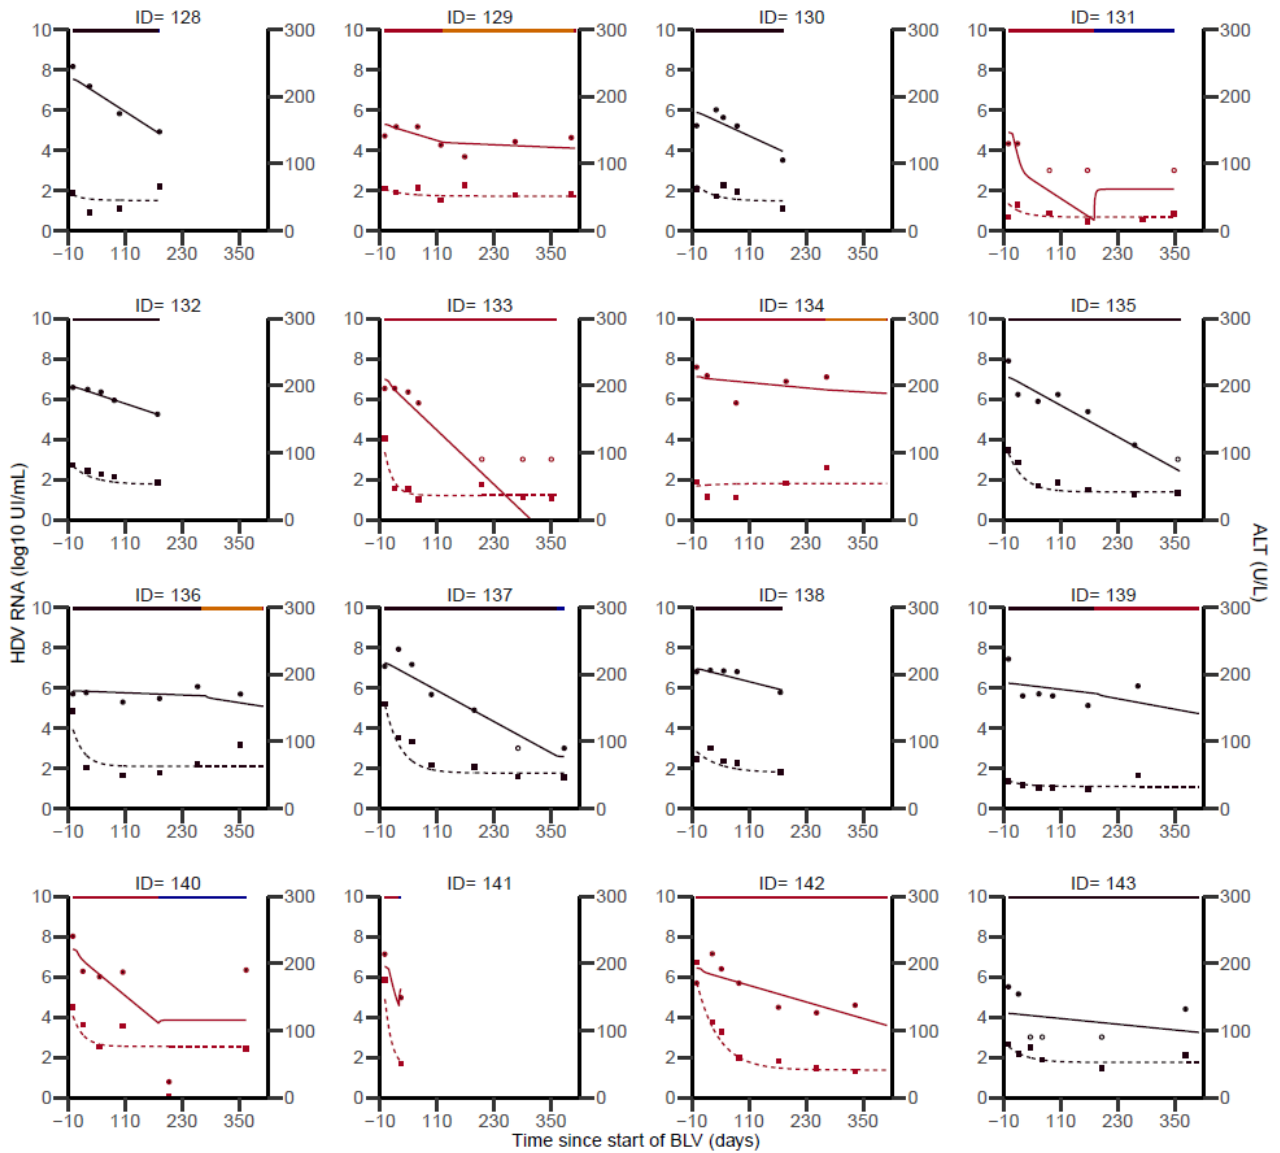

448  
 449 **Figure S14:** Individual predictions of HDV RNA (plain line) and ALT (dotted lines) in patients in the  
 450 group Bulevirtide (black lines) or bulevirtide+Peg-IFN (red lines). The top plain line indicates the  
 451 treatment received at each time (Red, Black, orange and blue for BLV+Peg-IFN, BLV only, Peg-  
 452 IFN only and off-treatment, respectively).

453  
 454  
 455  
 456  
 457  
 458  
 459

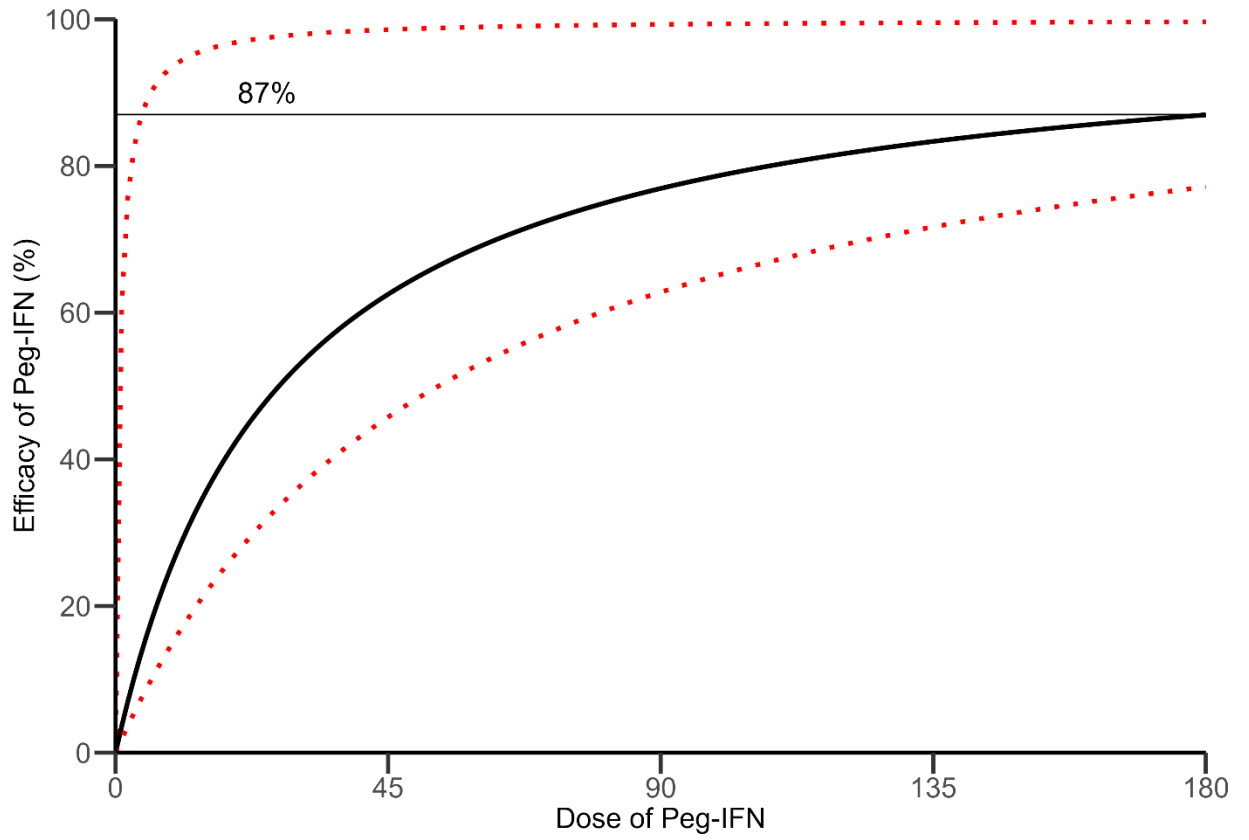

460  
461  
462  
463  
464  
465  
466  
467  
468  
469  
470

**Figure S15:** Relationship between the dose of Peg-IFN and the efficacy on blocking viral production in the sensitivity analysis taking into account the dose.



471 Tables

472 1. Limit of quantification

473

474 **Table S1** : Summary of the number of observation associated with the different limit of quantifications  
475 (LOQ) for HDV RNA available in our data.

| Limit of quantification (IU/mL) | Number of observations (n) |
|---------------------------------|----------------------------|
| 2                               | 117                        |
| 2.2                             | 13                         |
| 2.4                             | 3                          |
| 2.48                            | 3                          |
| 2.6                             | 4                          |
| 3                               | 141                        |

476

477

478

479

480

481

482

483 2. Estimation of treatment effect

484

485 **Table S2** : Results of the model building of drug inclusion

486

---

|                             |                                                                                           | <b>BIC</b> | <b>-2 LL</b> |
|-----------------------------|-------------------------------------------------------------------------------------------|------------|--------------|
| <i>Identifying the main</i> | Effect of BLV on $\beta$ only                                                             | 12567.07   | 12494.13     |
| <i>effect of Peg-IFN</i>    | Effect of BLV on $\beta$ + effect of Peg-IFN on $\beta$                                   | 12556.02   | 12472.67     |
|                             | Effect of BLV on $\beta$ + effect of Peg-IFN on $\delta$                                  | 12546.71   | 12463.36     |
|                             | Effect of BLV on $\beta$ + effect of Peg-IFN on $\rho$                                    | 12481.69   | 12398.34     |
| <i>Exploring additional</i> | Effect of BLV on $\beta$ + effect of Peg-IFN on $\rho$ +<br>effect of Peg-IFN on $\beta$  | 12480.88   | 12397.11     |
| <i>effects of Peg-IFN</i>   | Effect of BLV on $\beta$ + effect of Peg-IFN on $\rho$ +<br>effect of Peg-IFN on $\delta$ | 12490.00   | 12396.23     |

---

487

488

489

490

491

492

493

494

495

496

497

498

499

500

501

502

503

504

505 3. Sensitivity analysis taking into account the dose of Peg-IFN

506

507

**Table S3** : Parameters estimated in the sensitivity analysis accounting for the dose of Peg-IFN.

|                             |                                                           | Parameter estimate<br>(RSE%) | SD of the random<br>effect (RSE%) |
|-----------------------------|-----------------------------------------------------------|------------------------------|-----------------------------------|
| <i>Disease parameters</i>   |                                                           |                              |                                   |
| $\delta$                    | Loss rate of infected cells ( $d^{-1}$ )                  | $2.78 \cdot 10^{-2}$ (14.8)  | 0.814 (15.7)                      |
| $V_0$                       | Number of virions at baseline (log IU/mL)                 | 5.84 (2.15)                  | 1.39 (6.83)                       |
| $c_s$                       | ALT clearance ( $d^{-1}$ )                                | 2.38 (42.8)                  | 0.535 (101)                       |
| $A_0$                       | ALT value at baseline (U/L)                               | 123 (21.1)                   | 0.725 (8.9)                       |
| $A_{\text{co-young male}}$  | ALT value in absence of infection in young males (IU/L)   | 45.4 (9.01)                  | 0.528 (6.93)                      |
| $A_{\text{co-elderly}}$     | ALT value in absence of infection in elderly males (IU/L) | 58.4 (9.35)                  |                                   |
| $A_{\text{co-females}}$     | ALT value in absence of infection in young females (IU/L) | 35.9 (10.1)                  |                                   |
| <i>Drug effects</i>         |                                                           |                              |                                   |
| $\epsilon_s^{\text{BLV}}$   | Effect of BLV on blocking infection                       | 0.933 (10.7)                 | 5.25 (40.0)                       |
| $ED90^{\text{PEG}}$         | Effect of Peg-IFN on blocking viral production            | 243 (124)                    | 5.33 (32.8)                       |
| <i>Residual error model</i> |                                                           |                              |                                   |
| $a_{\text{HDV RNA}}$        | Additive residual error on HDV RNA ( $\log_{10}$ IU/mL)   | 0.754 (3.61)                 |                                   |
| $b_{\text{ALT}}$            | Proportional residual error on ALT                        | 0.310 (3.14)                 |                                   |

508

509

510

511

512

513

514

515

516 4. Model prediction : comparison to MY204 study

517

518 **Table S4** : Comparison of the prediction of the model in the intention-to-treat scenario versus MYR204.

519 The simulated LOQ was set to 50 IU/mL.

|                                              | <i>BLV+ PEG for 1y then BLV</i>          |                      | <i>BLV only (10 mg in MYR204, 2mg in the predictions)</i> |                    |
|----------------------------------------------|------------------------------------------|----------------------|-----------------------------------------------------------|--------------------|
|                                              | <i>Median predictions from the model</i> | <i>Myr 204</i>       | <i>Median predictions from the model</i>                  | <i>Myr 204</i>     |
| <b>Undetectable VL EoT</b>                   | 55%                                      | 44% (CI = [30 ; 60]) | 44%                                                       | 22% (CI=[15 ; 38]) |
| <b>Undetectable VL 24 FU (or Viral cure)</b> | 25%                                      | 32% (IC=[20 ; 45])   | 20%                                                       | 12% (CI=[5 ; 25])  |
| <b>ALT normalisation</b>                     | 40%                                      | 42% (IC=[30 ; 58])   | 39%                                                       | 30% (CI=[20 ; 45]) |

520

521

522

523

524

525

526

527

528

529

530

531

532

533

534

535

536

537

538

539

540

541
